# Supplementary material for: Phosphacycloalkyldiones: synthesis and coordinative behaviour of 6- and 7-member cyclic diketophosphanyls
Source: Royal Society of Chemistry journal article supplement (doi:10.1039/d0dt00864h), 2020-01-01
Supplement: d0dt00864h1.pdf [file d0dt00864h1.pdf]

# Phosphacycloalkyldiones: Synthesis and coordinative behaviour of 6- and 7-member cyclic diketophosphanyls

Kyle G. Pearce, Vladimir Simenok and Ian R. Crossley\*

*Department of Chemistry, University of Sussex, Falmer, Brighton, UK*

## Electronic Supplementary Information

|                                                                                |            |
|--------------------------------------------------------------------------------|------------|
| <b>Figure S1:</b> Molecular structure of MesP(SiMe <sub>3</sub> ) <sub>2</sub> | <b>S2</b>  |
| <b>Figure S2:</b> Molecular structure of Compound <b>5a</b>                    | <b>S2</b>  |
| <b>Figure S3:</b> Molecular structure of Compound <b>5d</b>                    | <b>S3</b>  |
| <b>Figures S4-S8:</b> NMR Spectra for Compound <b>2a</b> .                     | <b>S4</b>  |
| <b>Figures S9-S14:</b> NMR Spectra for Compound <b>2b</b> .                    | <b>S6</b>  |
| <b>Figures S15-S18:</b> NMR Spectra for Compound <b>2c</b> .                   | <b>S9</b>  |
| <b>Figures S19-S23:</b> NMR Spectra for Compound <b>2d</b> .                   | <b>S11</b> |
| <b>Figures S24-S29:</b> NMR Spectra for Compound <b>2e</b> .                   | <b>S14</b> |
| <b>Figures S30-S35:</b> NMR Spectra for Compound <b>3a</b> .                   | <b>S17</b> |
| <b>Figures S36-S41:</b> NMR Spectra for Compound <b>3b</b> .                   | <b>S20</b> |
| <b>Figures S42-S46:</b> NMR Spectra for Compound <b>3c</b> .                   | <b>S23</b> |
| <b>Figures S47-S50:</b> NMR Spectra for Compound <b>3d</b> .                   | <b>S25</b> |
| <b>Figures S51-S56:</b> NMR Spectra for Compound <b>4</b> .                    | <b>S27</b> |
| <b>Figures S57-S62:</b> NMR Spectra for Compound <b>5a</b> .                   | <b>S30</b> |
| <b>Figures S63-S68:</b> NMR Spectra for Compound <b>5b</b> .                   | <b>S33</b> |
| <b>Figures S69-S72:</b> NMR Spectra for Compound <b>5c</b> .                   | <b>S36</b> |
| <b>Figures S73-S78:</b> NMR Spectra for Compound <b>5d</b> .                   | <b>S38</b> |
| <b>Figures S79-S87:</b> NMR Spectra for Compound <b>6</b> .                    | <b>S41</b> |
| <b>Figures S88-S92:</b> HRMS-EI for Compounds <b>2a-2e</b> .                   | <b>S46</b> |
| <b>Figures S93-S96:</b> HRMS-EI for Compounds <b>3a-3d</b> .                   | <b>S48</b> |
| <b>Figures S97-S98:</b> LRMS-EI for Compound <b>6</b> .                        | <b>S51</b> |

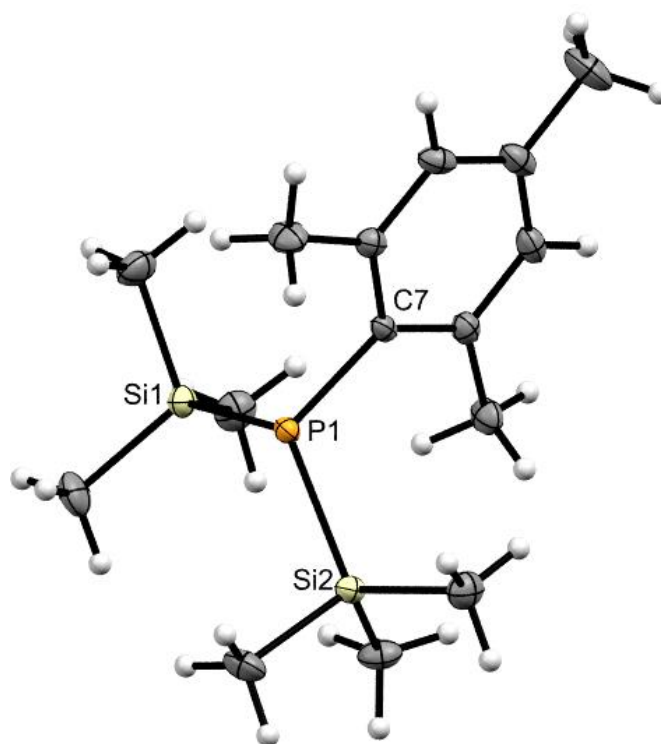

**Figure S1.** Molecular structure of  $\text{MesP}(\text{SiMe}_3)_2$  with displacement ellipsoids at 50 %. The asymmetric unit contains two independent molecules of comparable geometry. Selected geometric parameters ( $\text{\AA}$ , deg.): P1–Si1 2.2465(5), P1–Si2 2.2529(5), P1–C7 1.8505(13), Si–P–Si 111.04(2), Si1–P1–C7 103.07(5), Si2–P1–C7 114.58(4)

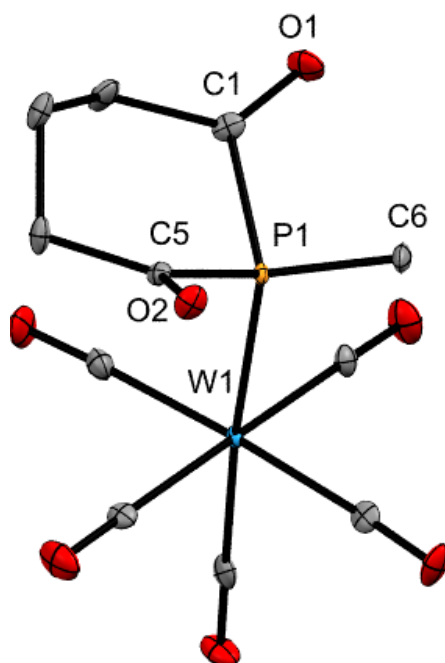

**Figure S2.** Molecular structure of **5a** with displacement ellipsoids at 50 % and hydrogen atoms omitted for clarity. Selected geometric parameters ( $\text{\AA}$ ): W1–P1 2.5065(7), W1–C<sub>trans</sub> 1.998(3), W1–C<sub>cis</sub> 2.045(3)–2.064(4), C–O<sub>trans</sub> 1.145(4), C–O<sub>cis</sub> 1.133(5)–1.143(4), P1–C6 1.815(3), P1–C5 1.881(4), P1–C1 1.880(3), C1–O1 1.202(4) C5–O2 1.206(4).

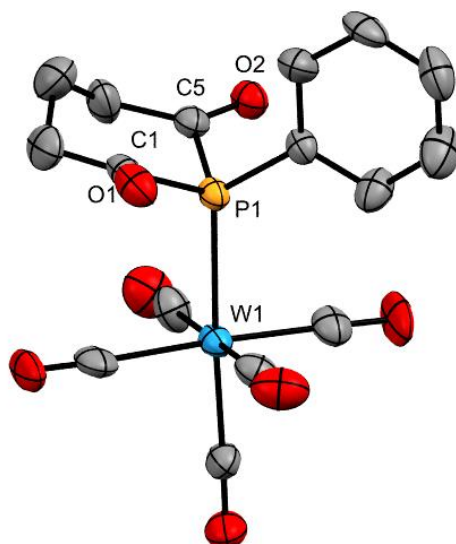

**Figure S3.** Molecular structure of **5d** with displacement ellipsoids at 50 % and hydrogen atoms omitted for clarity. The asymmetric unit includes a second molecule that is subject to disorder. Selected geometric parameters (Å): W1–P1 2.490(3), W1–C<sub>trans</sub> 2.009(11), W1–C<sub>cis</sub> 2.02(1) – 2.05(1), C–O<sub>trans</sub> 1.14 (2), C–O<sub>cis</sub> 1.13(1) – 1.17(2), P1–C6 1.818(10), P1–C5 1.889(12), P1–C1 1.882(10), C1–O1 1.212(13) C5–O2 1.205(10).

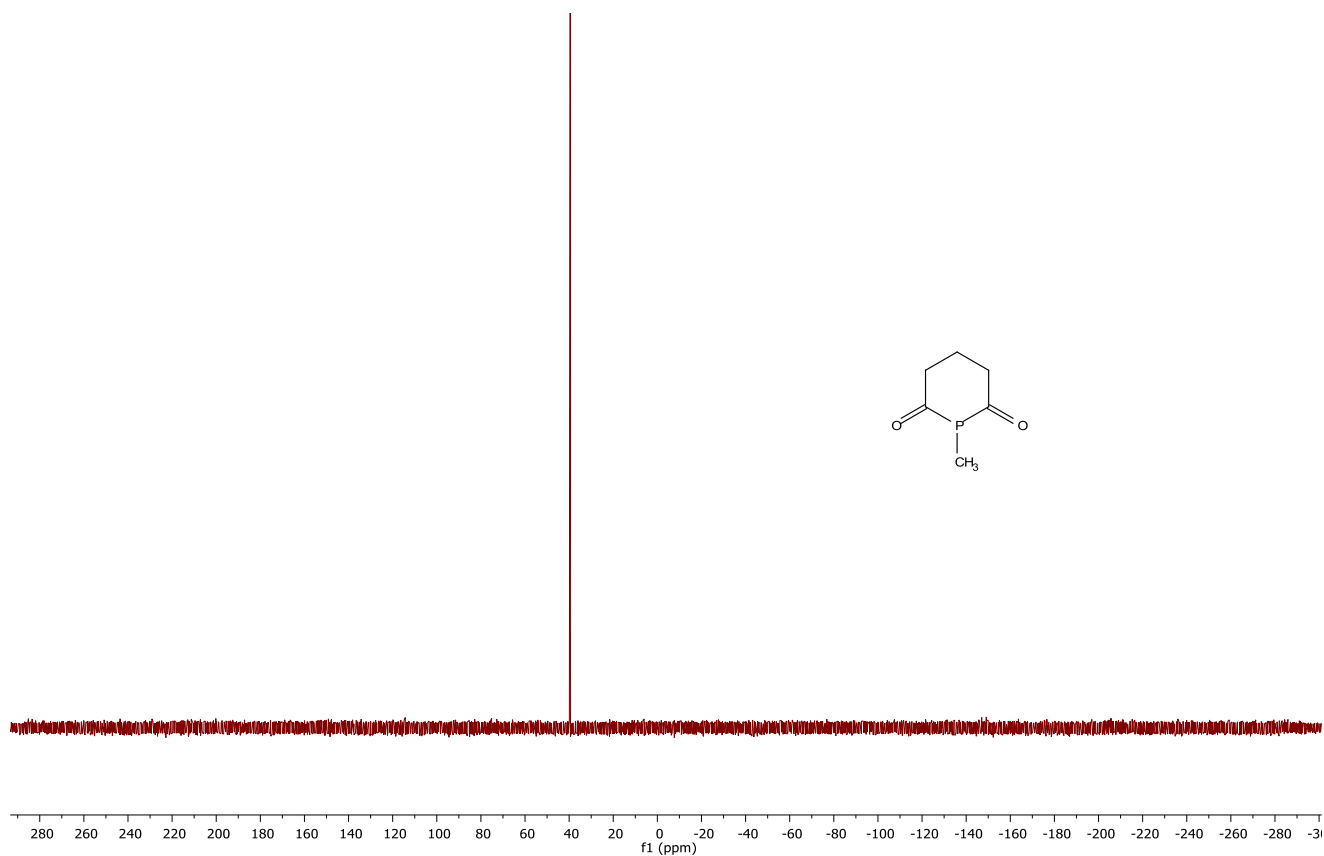

**Figure S4.**  $^{31}\text{P}\{^1\text{H}\}$  NMR Spectrum ( $\text{CDCl}_3$ , 303 K, 161.72 MHz) for compound **2a**.

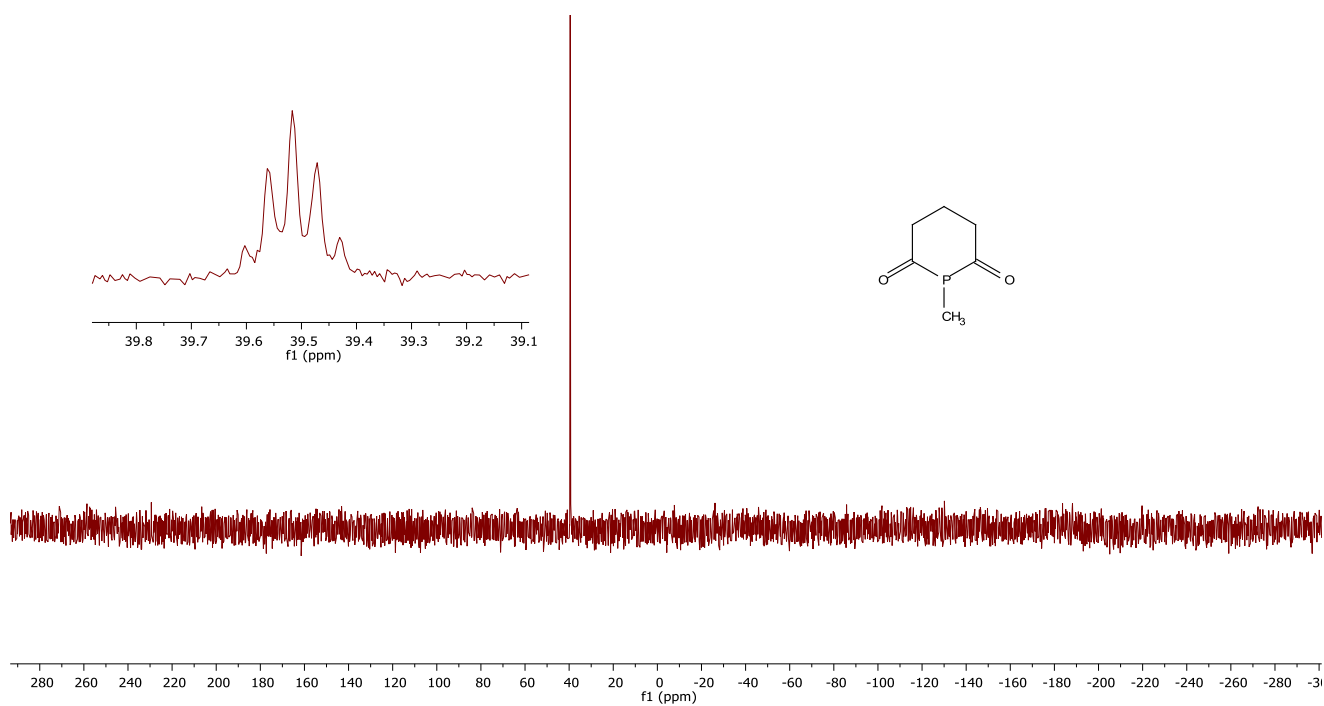

**Figure S5.**  $^{31}\text{P}$  NMR Spectrum ( $\text{CDCl}_3$ , 303 K, 161.72 MHz) for compound **2a**.

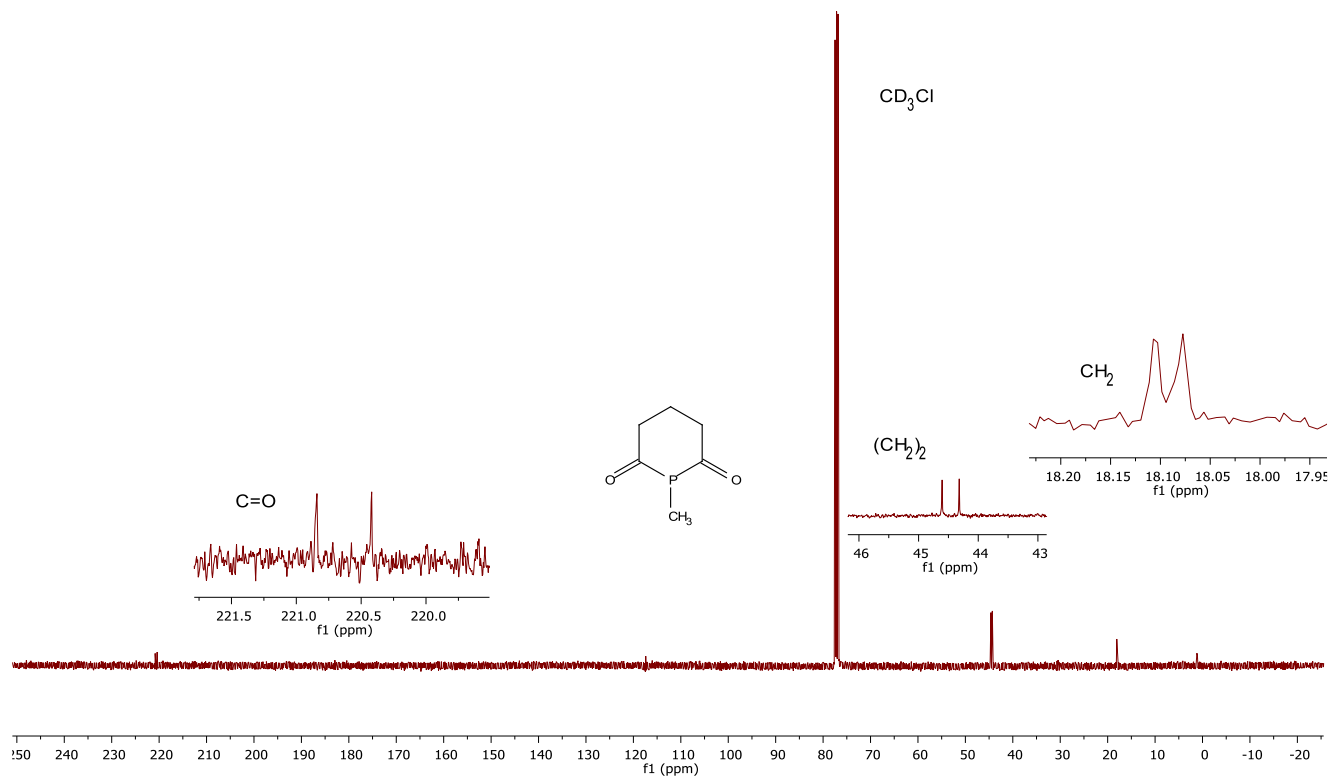

Figure S6.  $^{13}\text{C}\{^1\text{H}\}$  NMR Spectrum ( $\text{CDCl}_3$ , 303 K, 100.46 MHz) for compound **2a**.

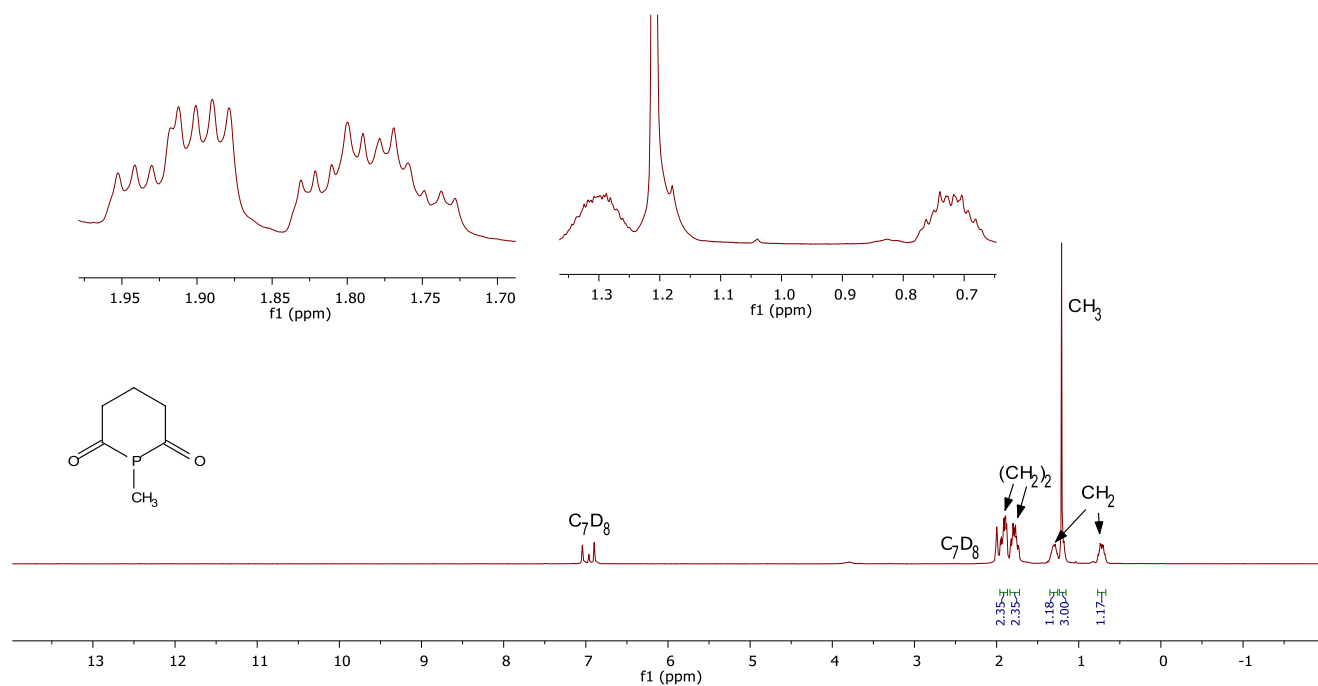

Figure S7.  $^1\text{H}$  NMR Spectrum ( $\text{C}_7\text{D}_8$ , 238 K, 399.49 MHz) for compound **2a**.

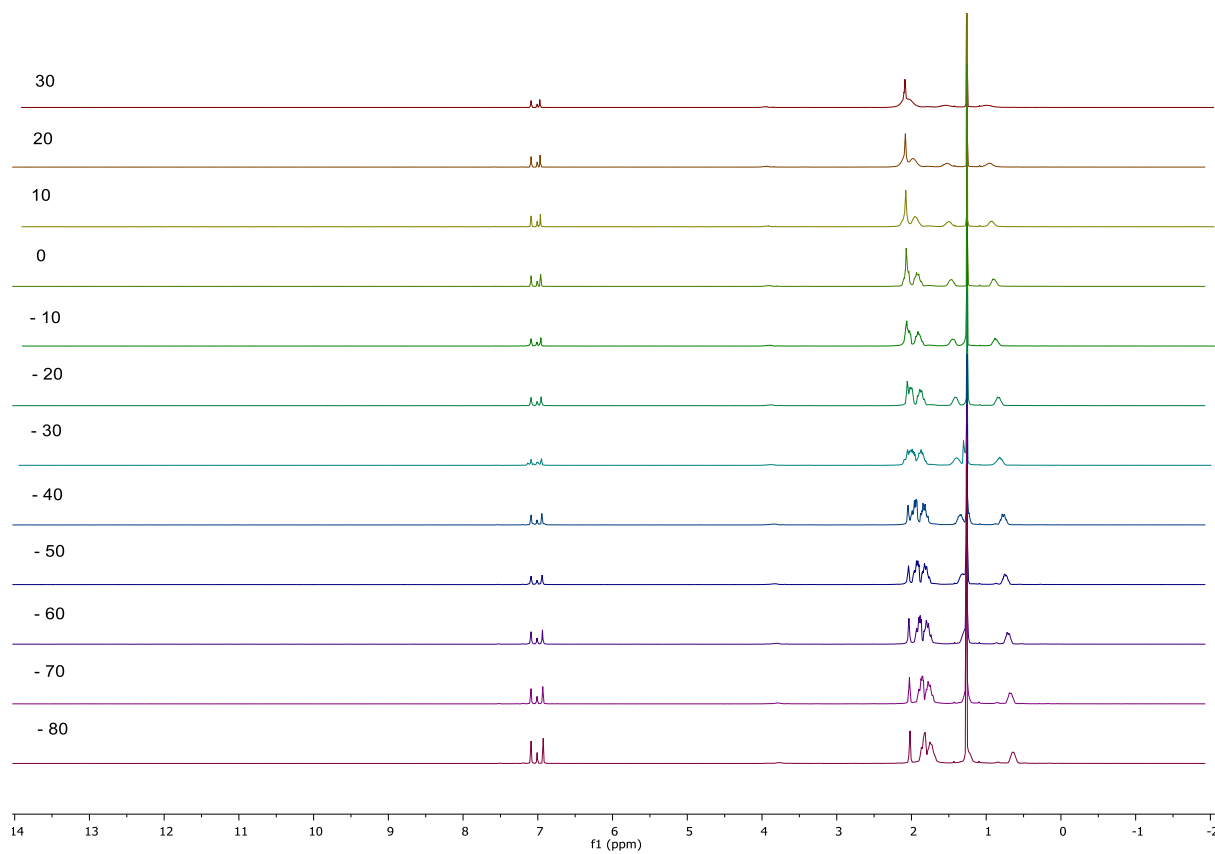

**Figure S8.** Stacked Variable Temperature  $^1\text{H}$  NMR Spectra ( $\text{C}_7\text{D}_8$ , 303 K – 193 K, 399.49 MHz) for compound **2a**.

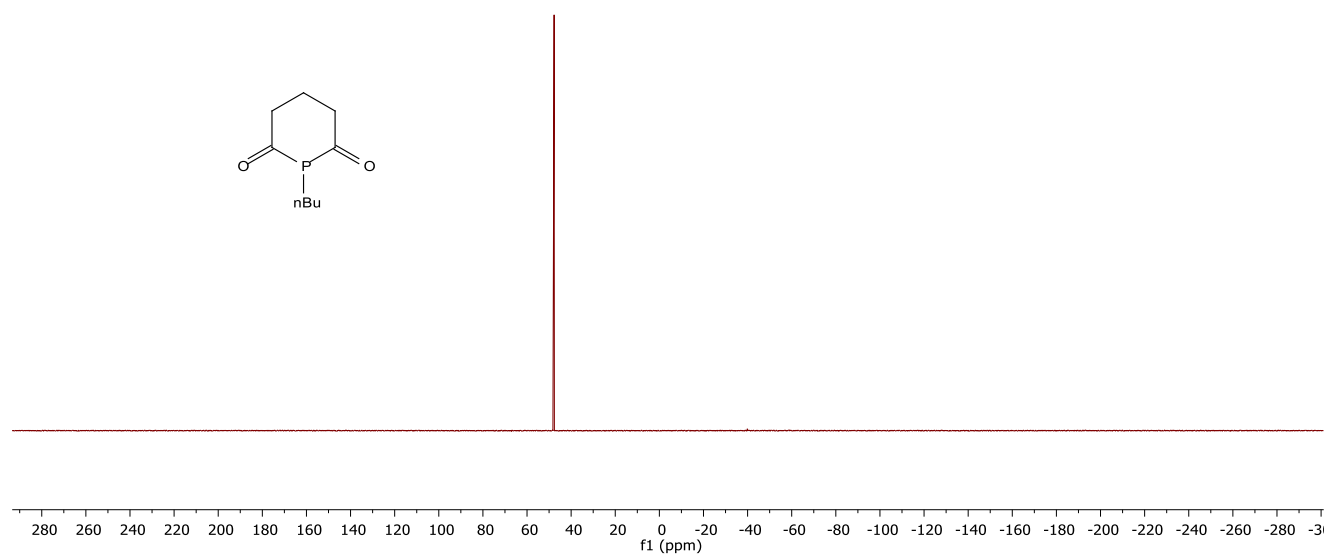

**Figure S9.**  $^{31}\text{P}\{^1\text{H}\}$  NMR Spectrum ( $\text{C}_6\text{D}_6$ , 303 K, 161.72 MHz) for compound **2b**.

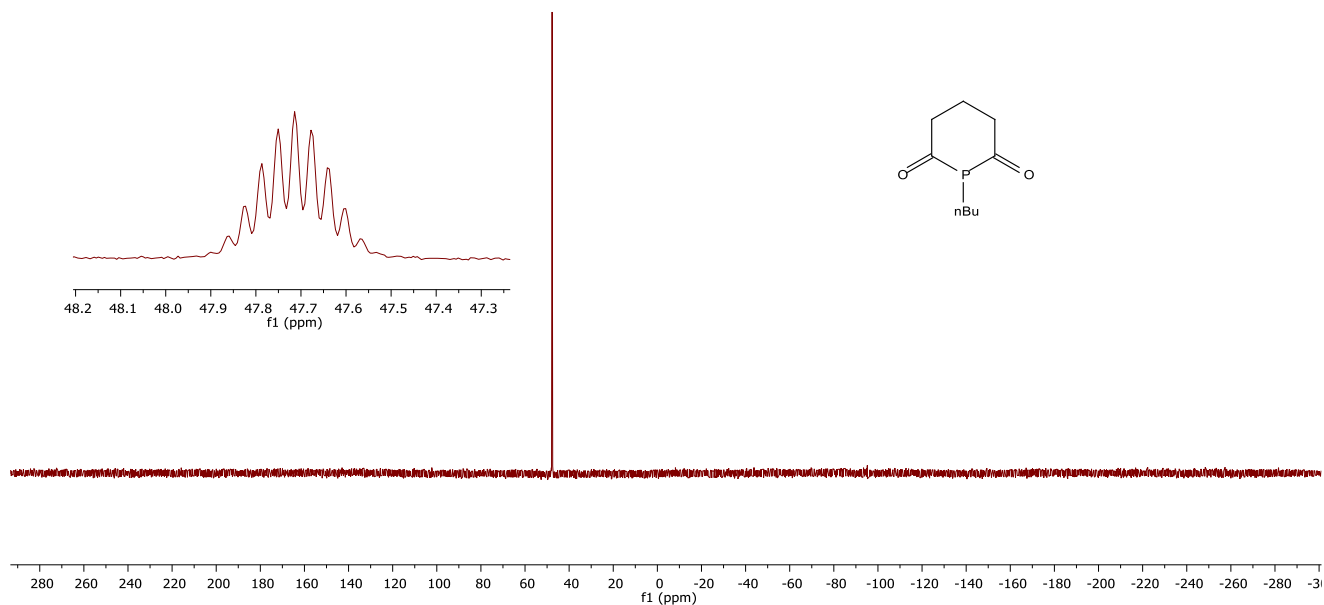

Figure S10.  $^{31}\text{P}$  NMR Spectrum ( $\text{C}_6\text{D}_6$ , 303 K, 161.72 MHz) for compound **2b**.

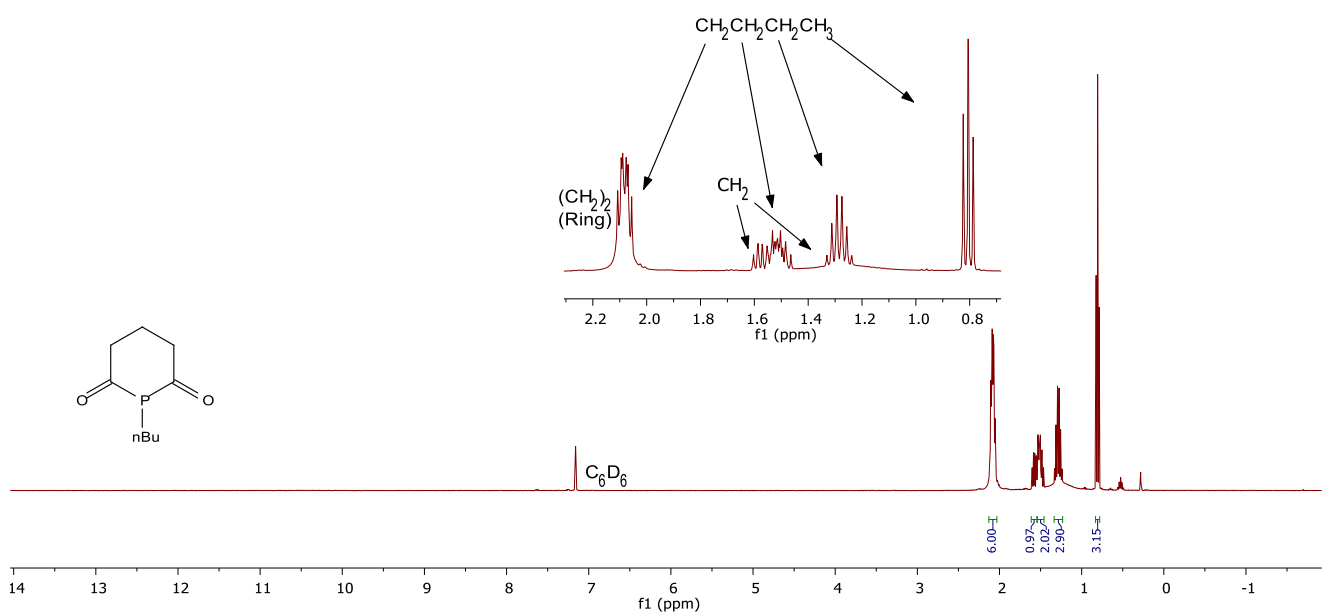

Figure S11.  $^1\text{H}$  NMR Spectrum ( $\text{C}_6\text{D}_6$ , 303 K, 399.49 MHz) for compound **2b**.

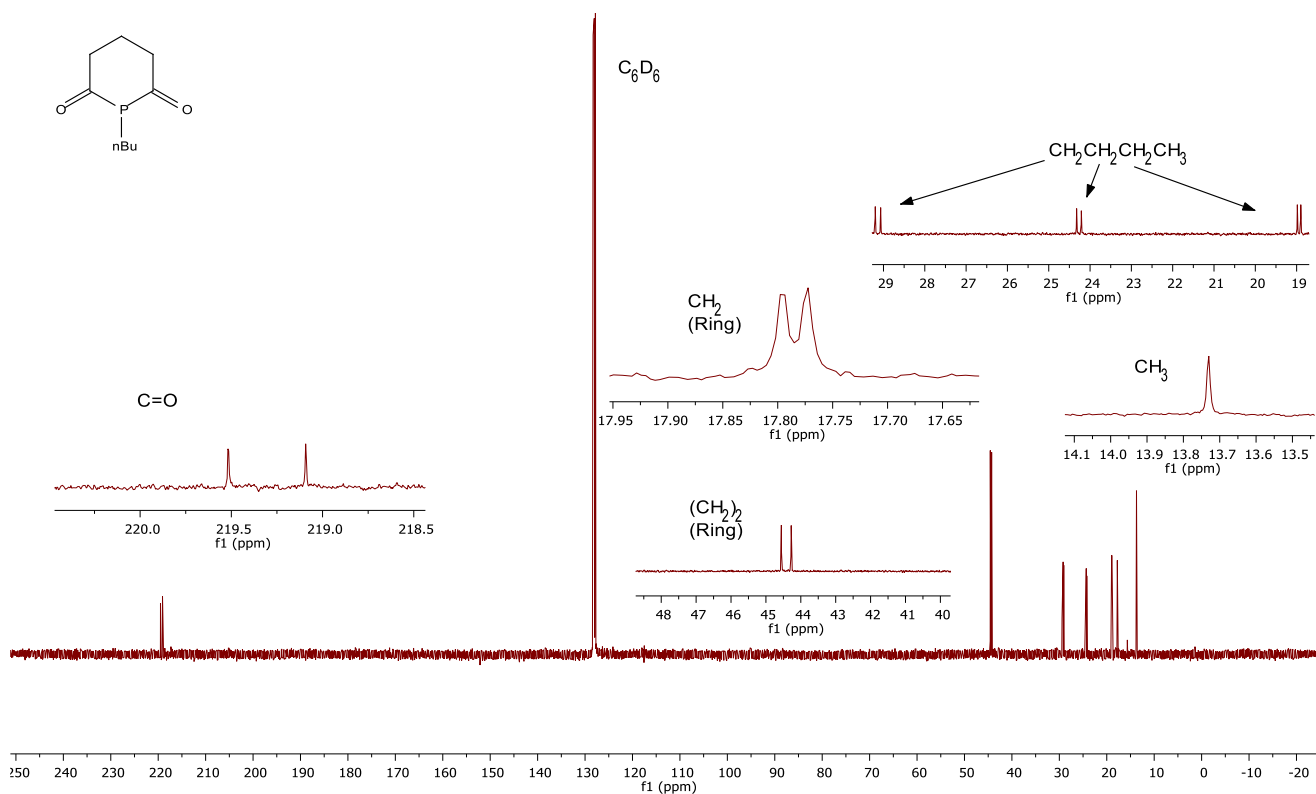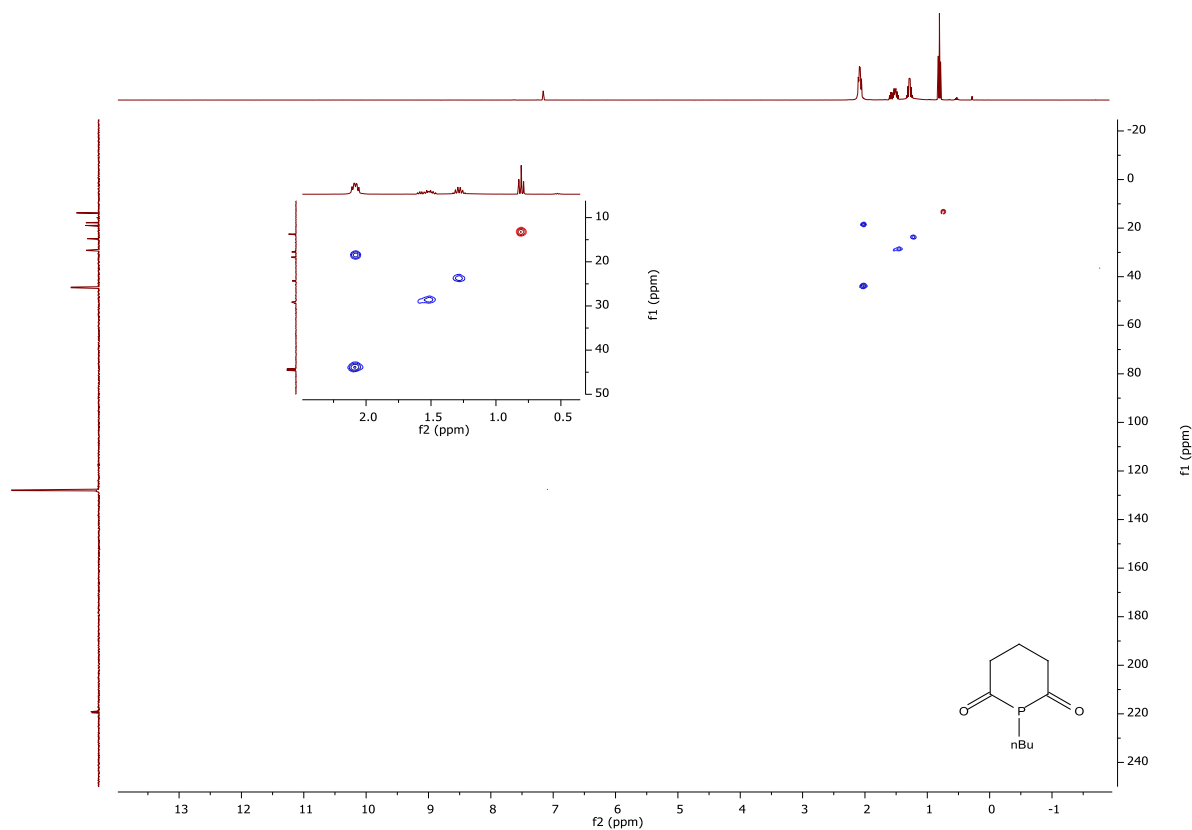



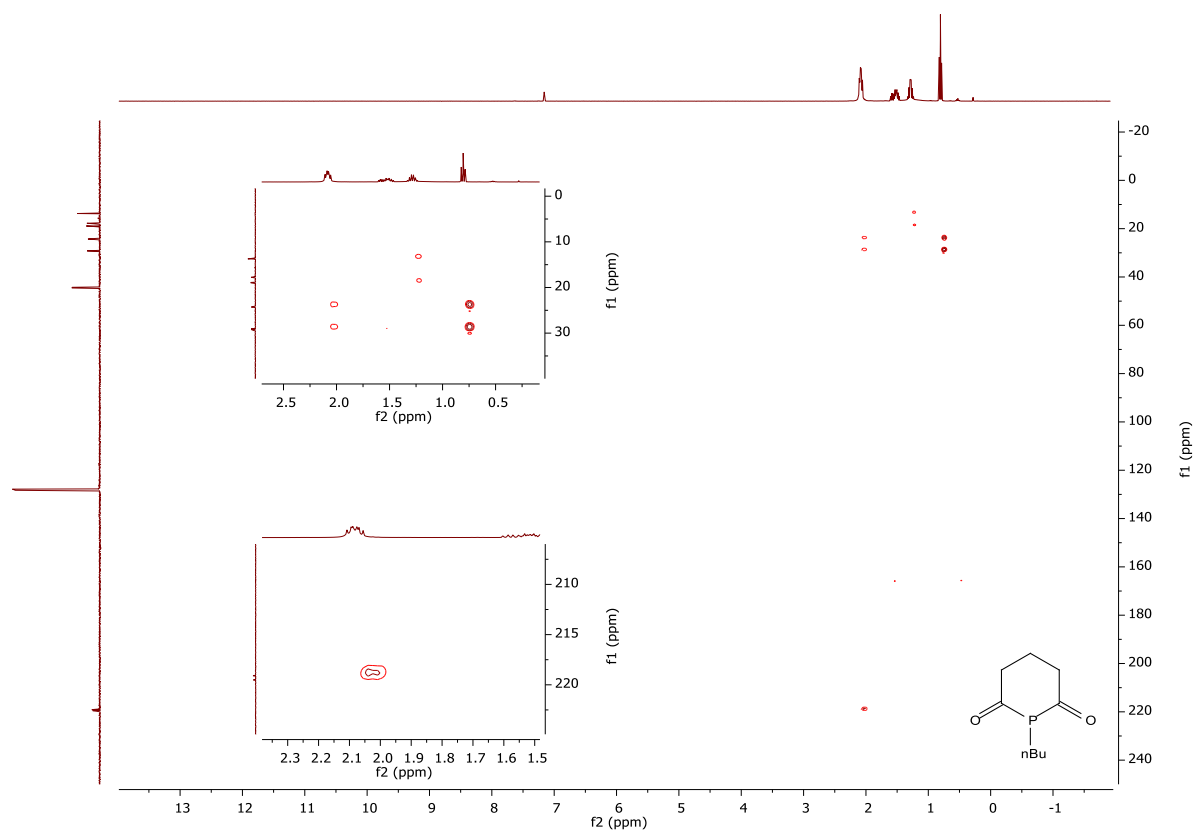

**Figure S14.**  $^1\text{H}$ - $^{13}\text{C}$  HMBC trace ( $\text{C}_6\text{D}_6$ , 303 K, 399.49, 100.46 MHz) for Compound **2b**.

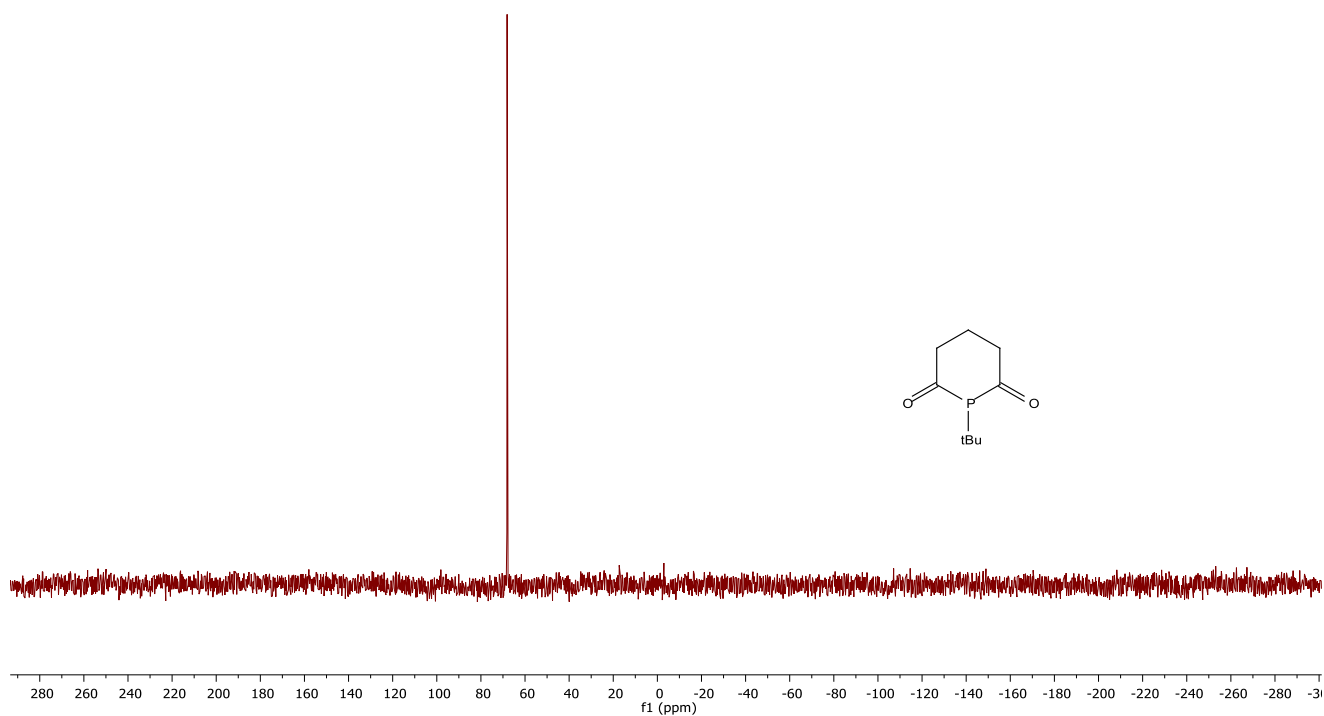

**Figure S15.**  $^{31}\text{P}\{^1\text{H}\}$  NMR Spectrum ( $\text{C}_6\text{D}_6$ , 303 K, 161.72 MHz) for compound **2c**.

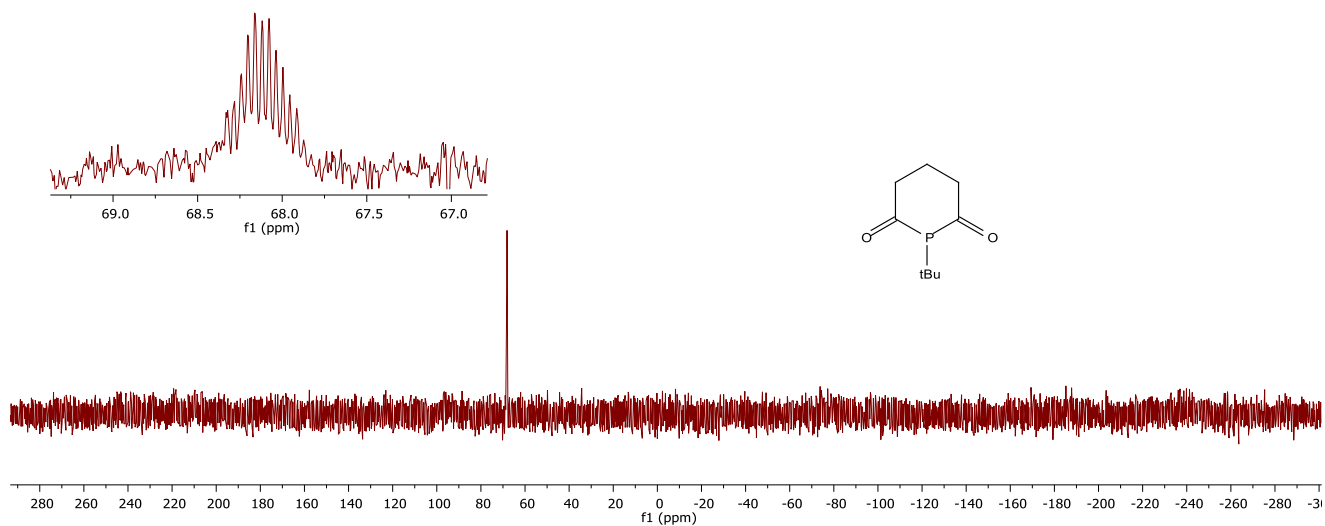

**Figure S16.**  $^{31}\text{P}$  NMR Spectrum ( $\text{C}_6\text{D}_6\text{O}$ , 303 K, 161.72 MHz) for compound **2c**.

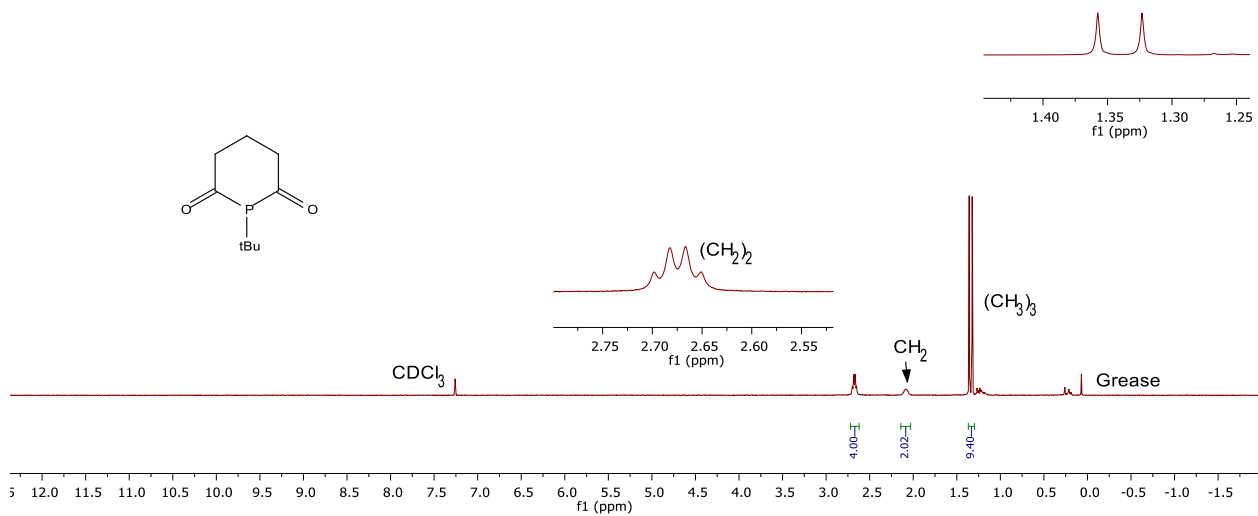

**Figure S17.**  $^1\text{H}$  NMR Spectrum ( $\text{CD}_3\text{Cl}$ , 303 K, 399.49 MHz) for compound **2c**.

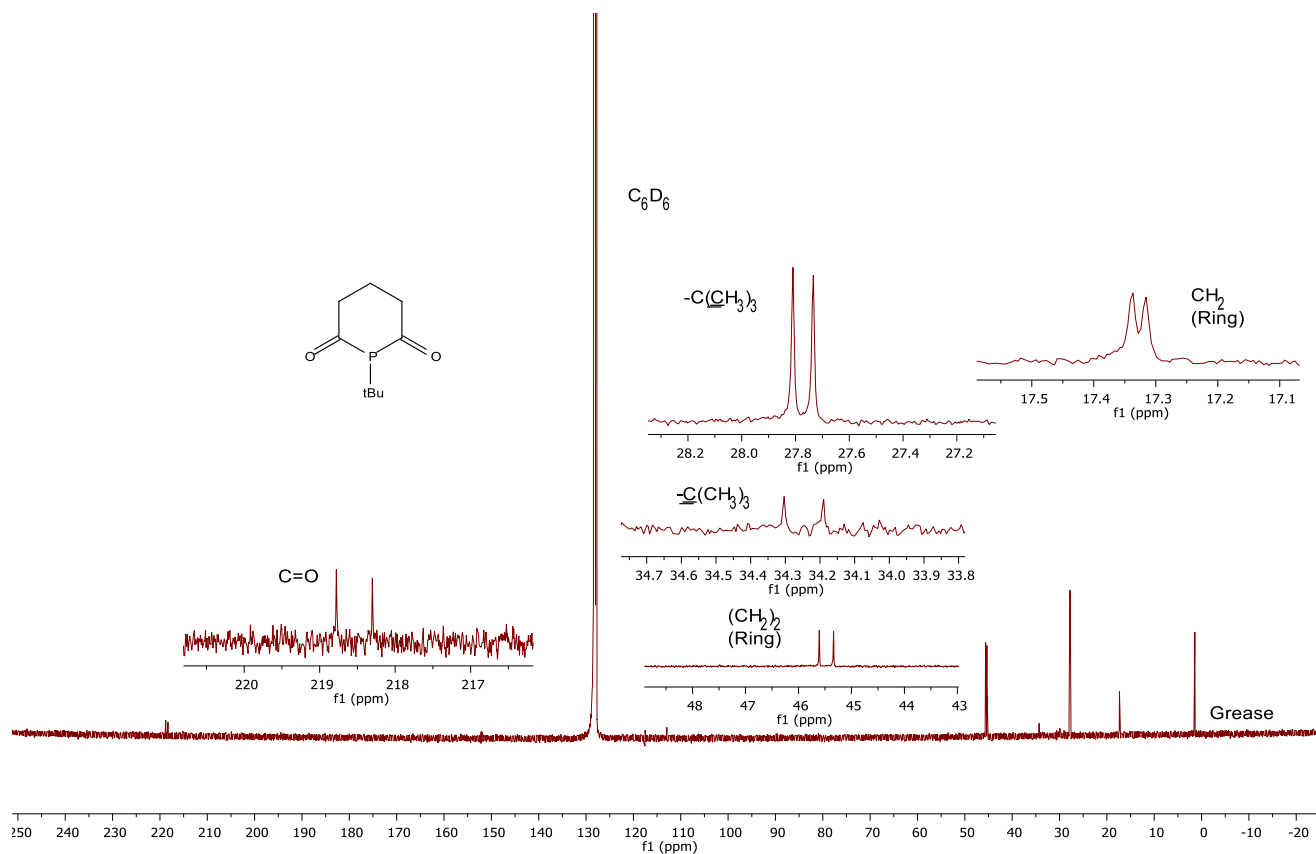

Figure S18.  $^{13}C\{^1H\}$  NMR Spectrum ( $C_6D_6$ , 303 K, 100.46 MHz) for compound **2c**.

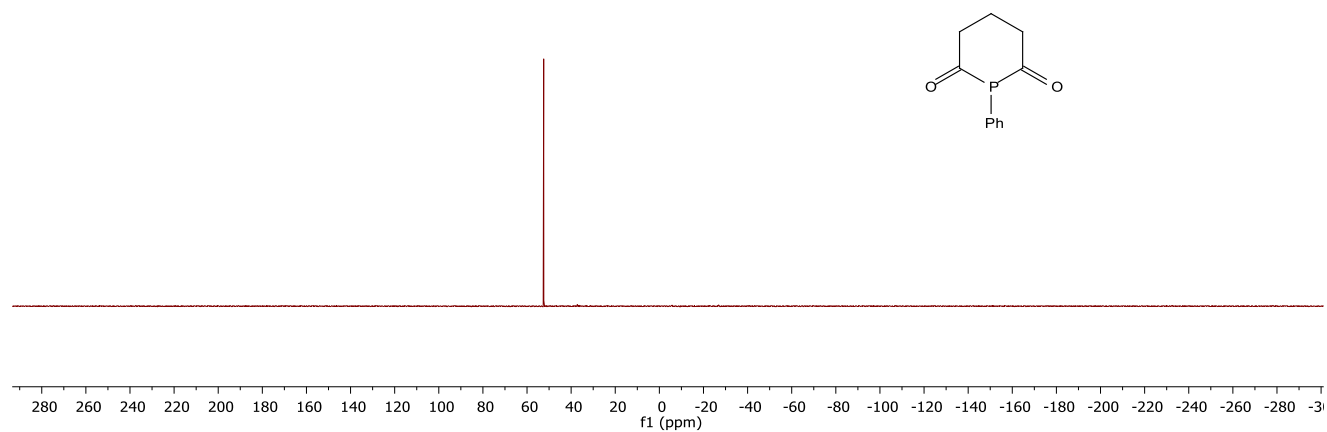

Figure S19.  $^{31}P\{^1H\}$  NMR Spectrum ( $CD_2Cl_2$ , 303 K, 161.72 MHz) for compound **2d**.

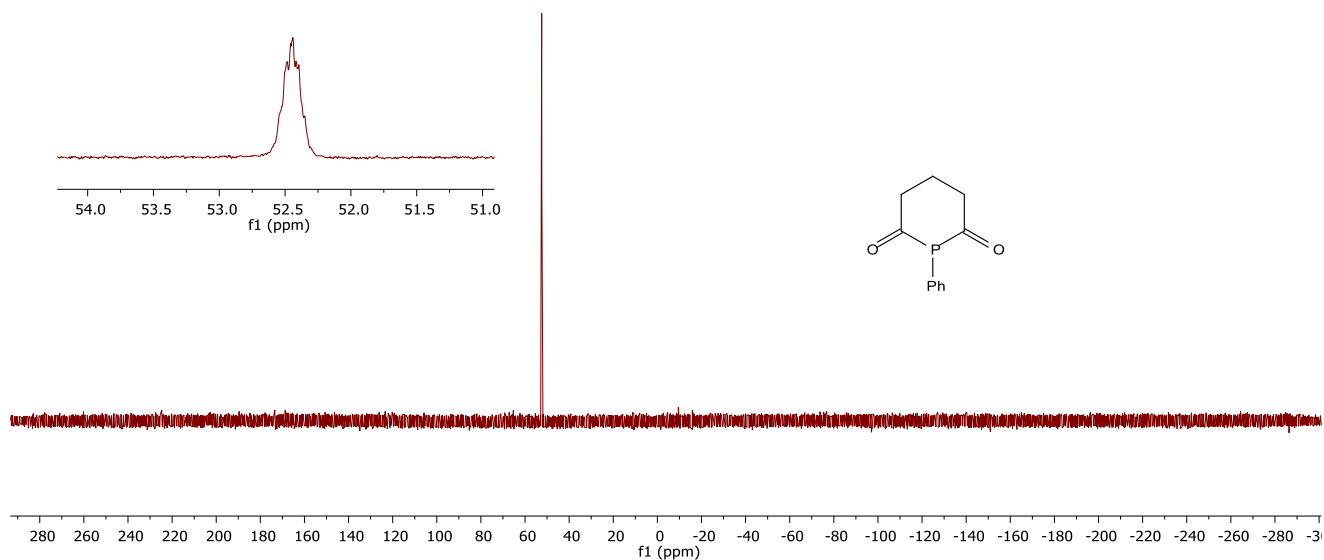

Figure S20.  $^{31}\text{P}$  NMR Spectrum ( $\text{CD}_2\text{Cl}_2$ , 303 K, 161.72 MHz) for compound 2d.

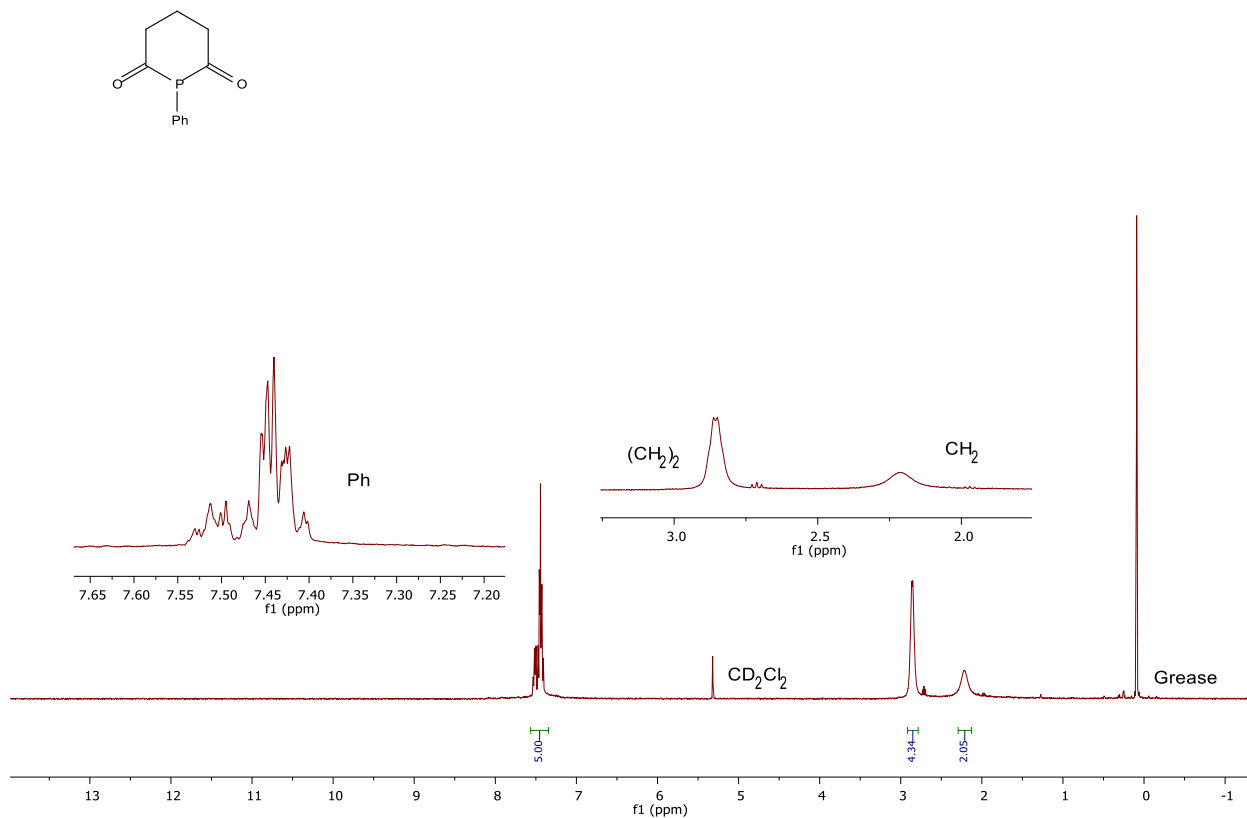

Figure S21.  $^1\text{H}$  NMR Spectrum ( $\text{CD}_2\text{Cl}_2$ , 303 K, 399.49 MHz) for compound 2d.

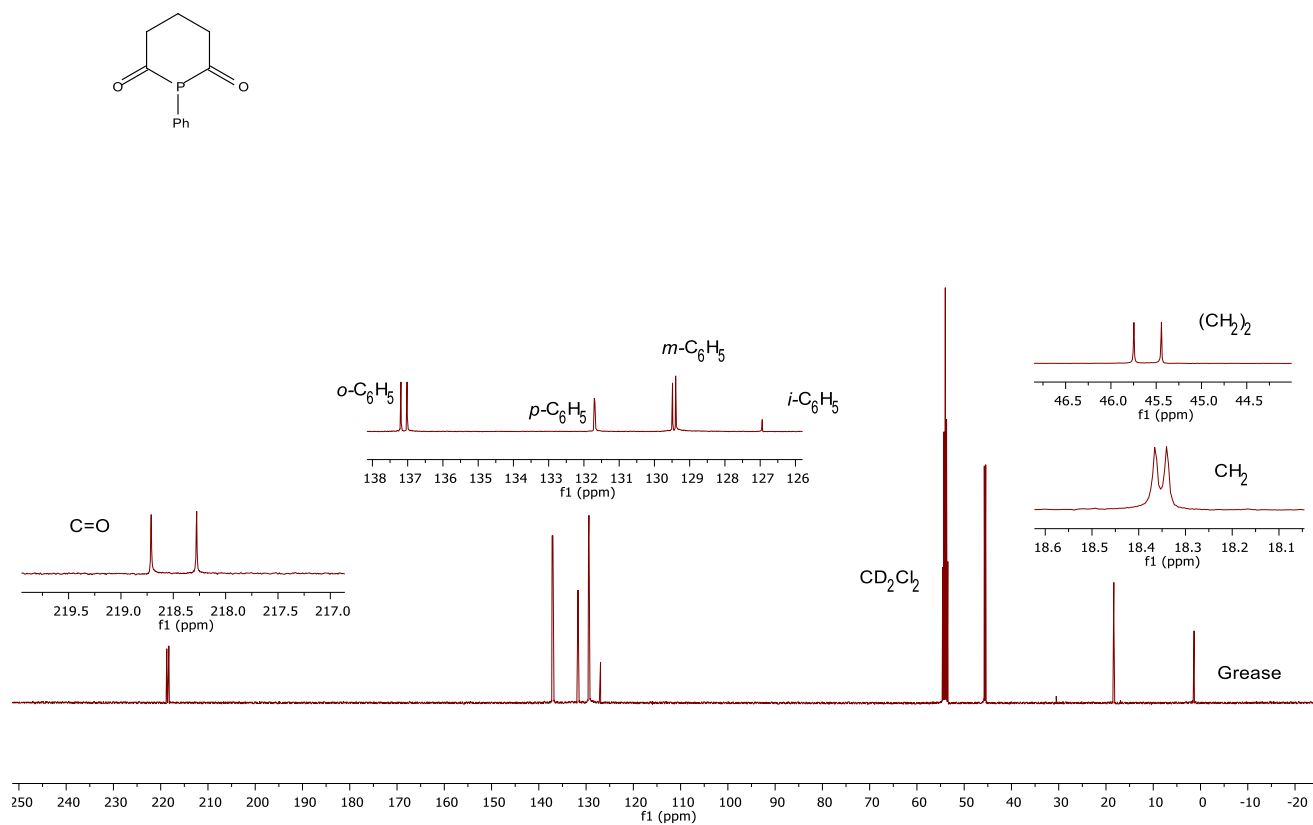

**Figure S22.**  $^{13}\text{C}\{^1\text{H}\}$  NMR Spectrum ( $\text{CD}_2\text{Cl}_2$ , 303 K, 100.46 MHz) for compound **2d**.

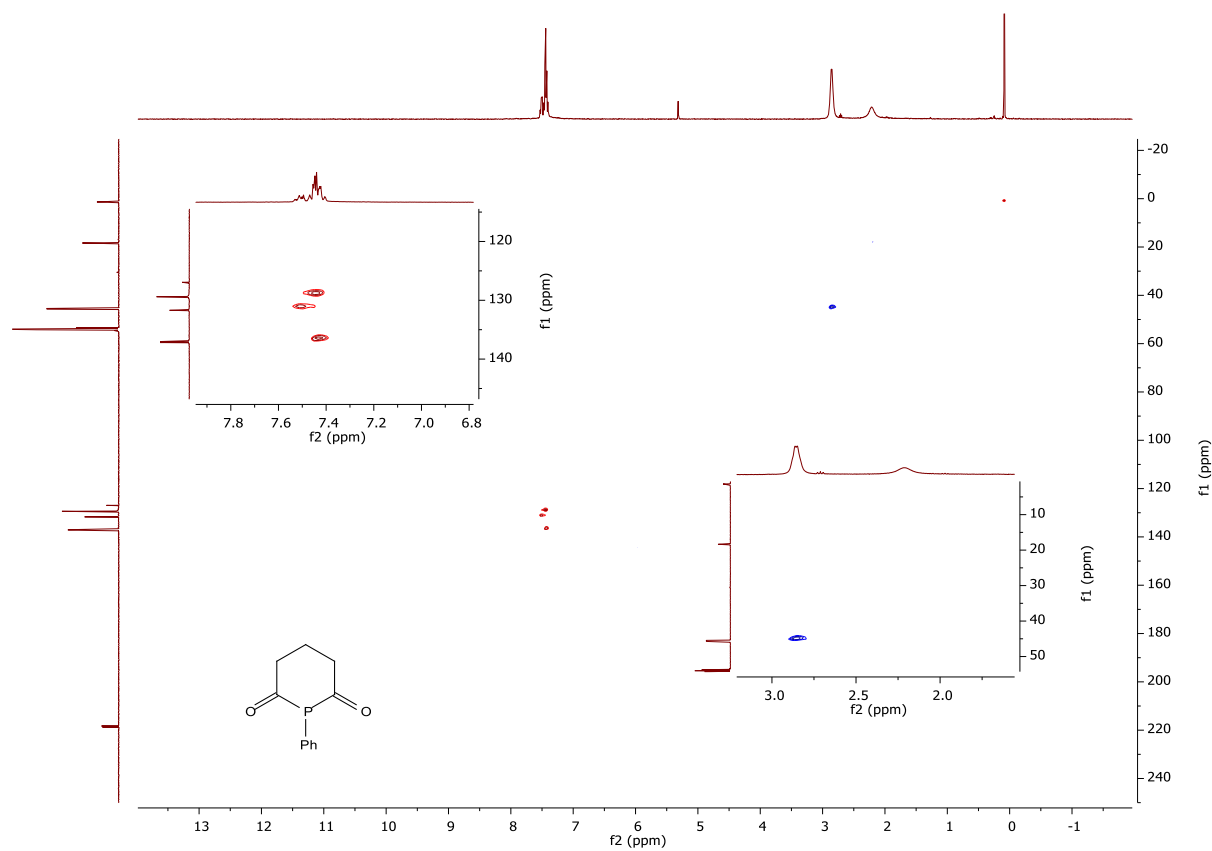

**Figure S23.**  $^1\text{H}\text{-}^{13}\text{C}$  HSQC trace ( $\text{CD}_2\text{Cl}_2$ , 303 K, 399.49, 100.46 MHz) for Compound **2d**.

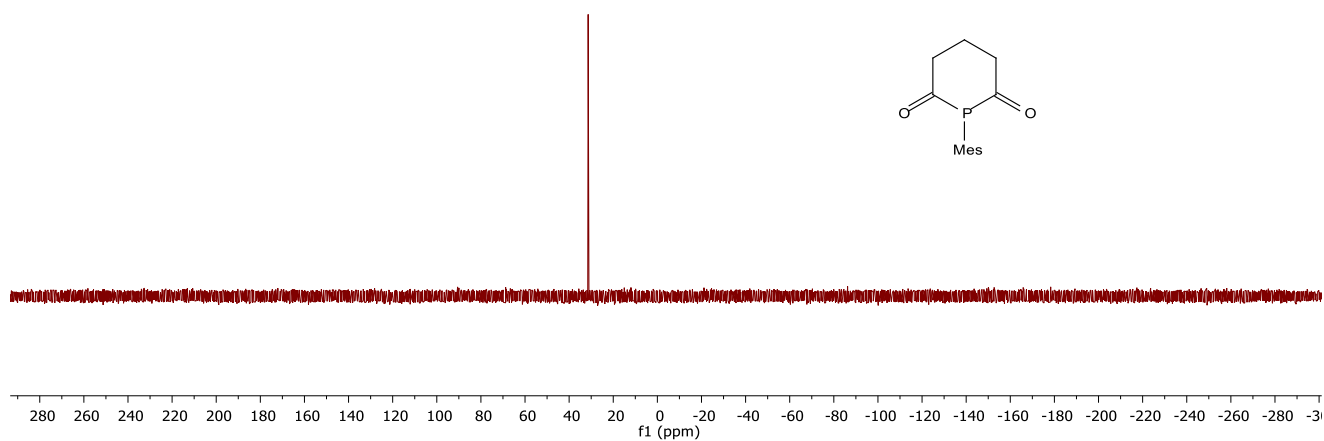

**Figure S24.**  $^{31}\text{P}\{^1\text{H}\}$  NMR Spectrum ( $\text{C}_6\text{D}_6$ , 303 K, 161.72 MHz) for compound **2e**.

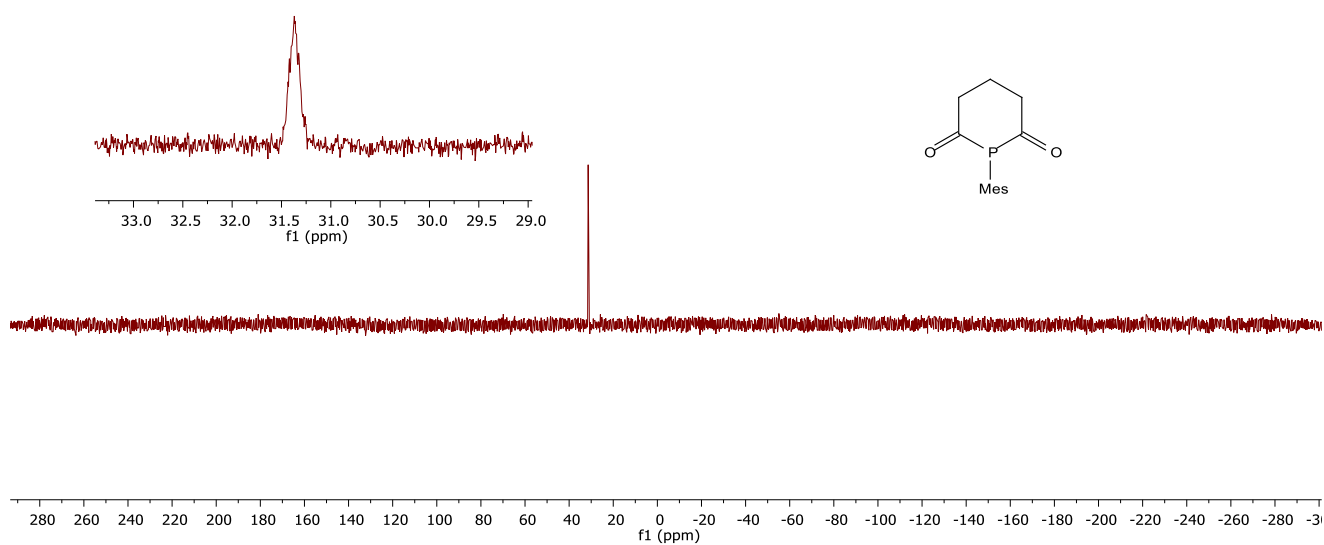

**Figure S25.**  $^{31}\text{P}$  NMR Spectrum ( $\text{C}_6\text{D}_6$ , 303 K, 161.72 MHz) for compound **2e**.

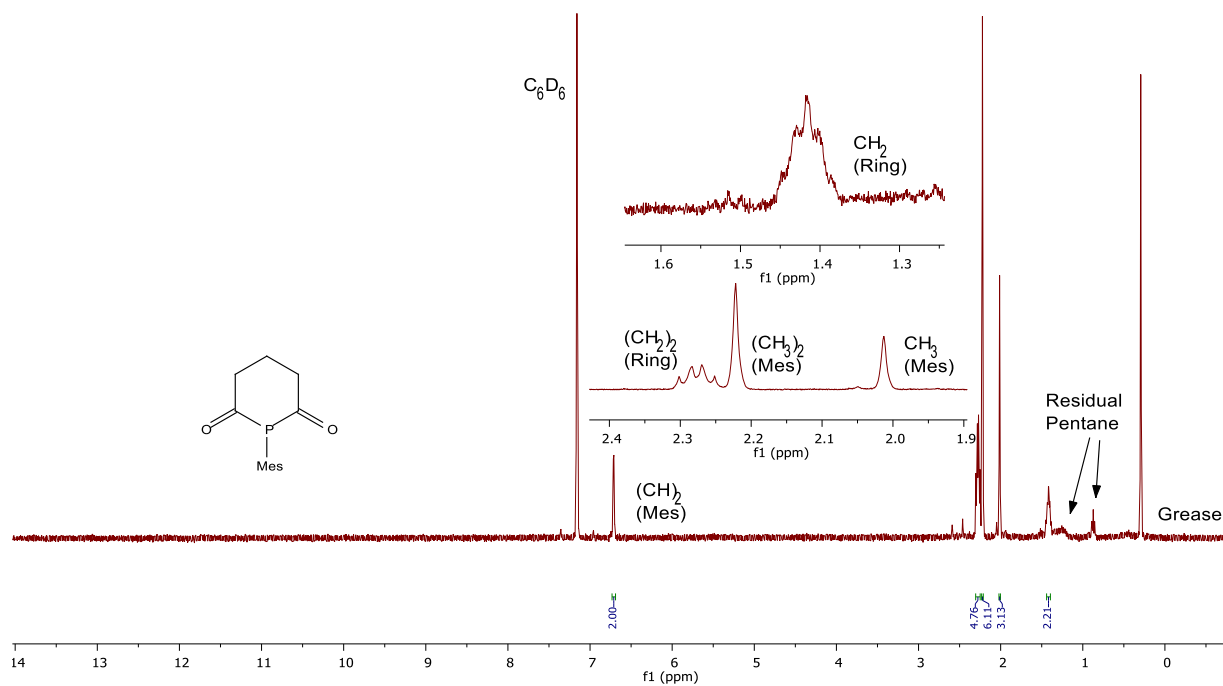

Figure S26.  $^1\text{H}$  NMR Spectrum ( $\text{C}_6\text{D}_6$ , 303 K, 399.49 MHz) for compound 2e.

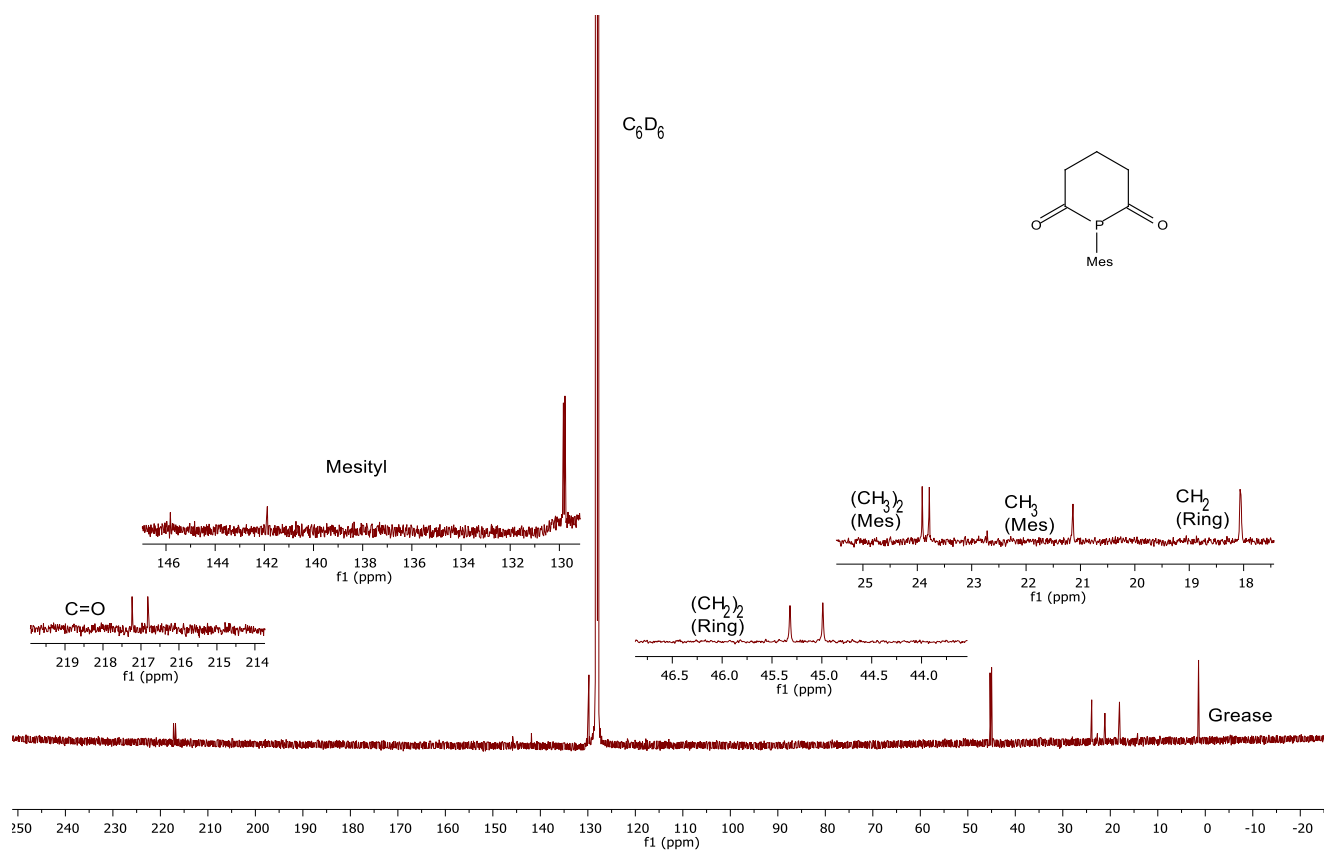

Figure S27.  $^{13}\text{C}\{^1\text{H}\}$  NMR Spectrum ( $\text{C}_6\text{D}_6$ , 303 K, 100.46 MHz) for compound 2e.

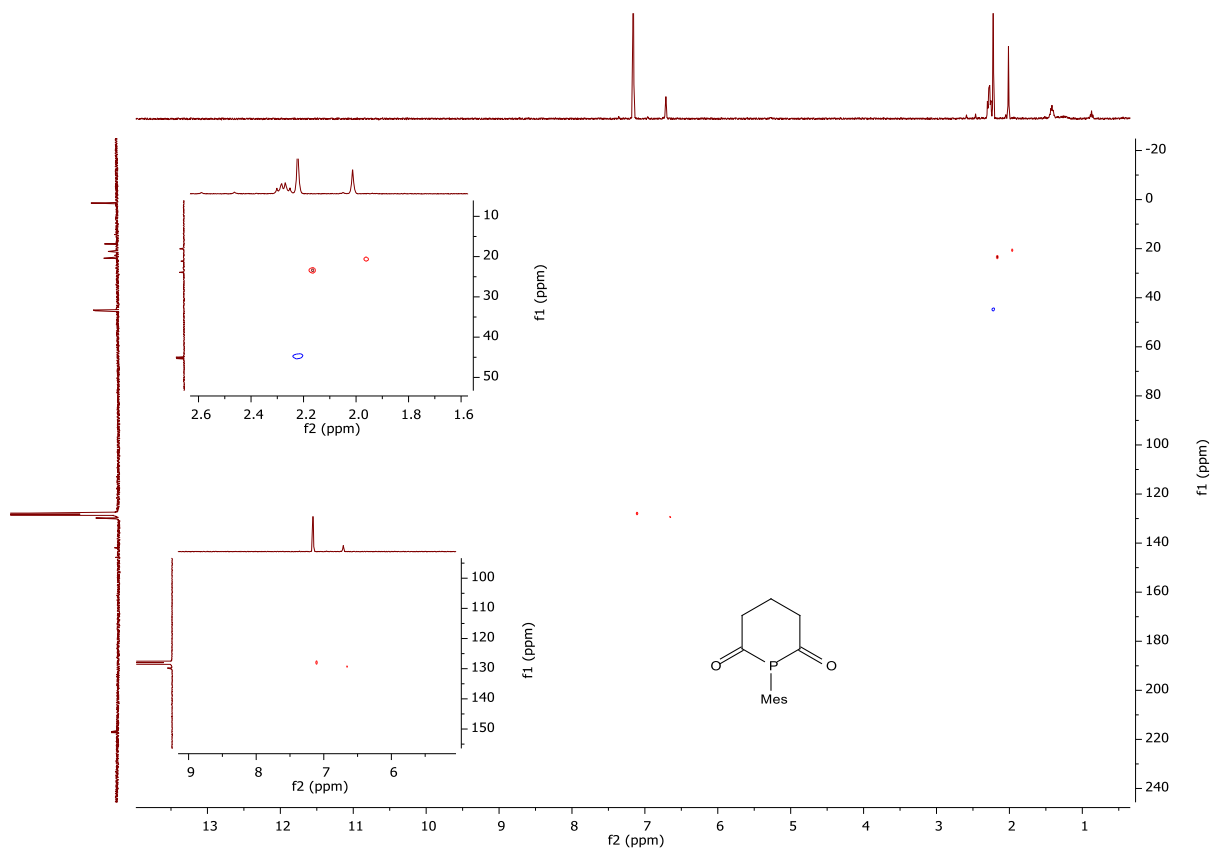

**Figure S28.**  $^1\text{H}$ - $^{13}\text{C}$  HSQC trace ( $\text{C}_6\text{D}_6$ , 303 K, 399.49, 100.46 MHz) for Compound **2e**.

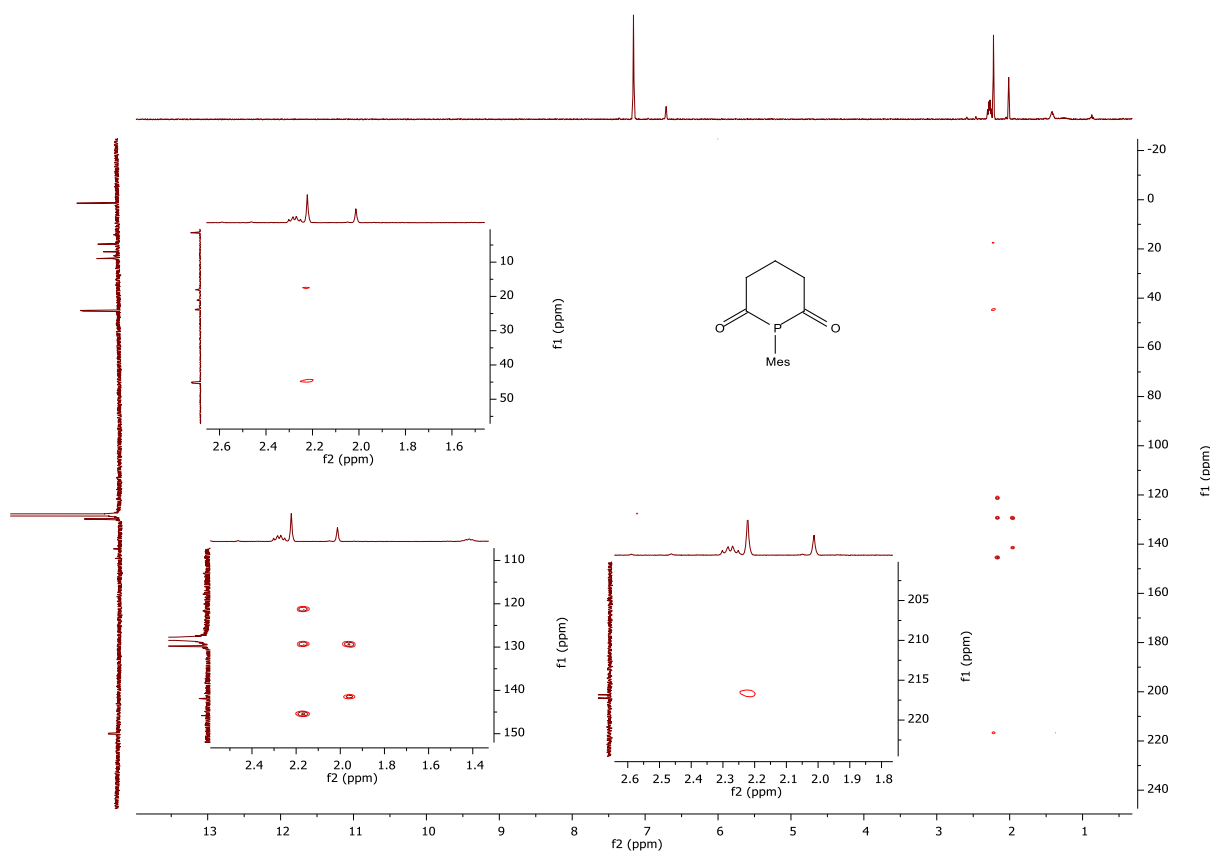

**Figure S29.**  $^1\text{H}$ - $^{13}\text{C}$  HMBC trace ( $\text{C}_6\text{D}_6$ , 303 K, 399.49, 100.46 MHz) for Compound **2e**.



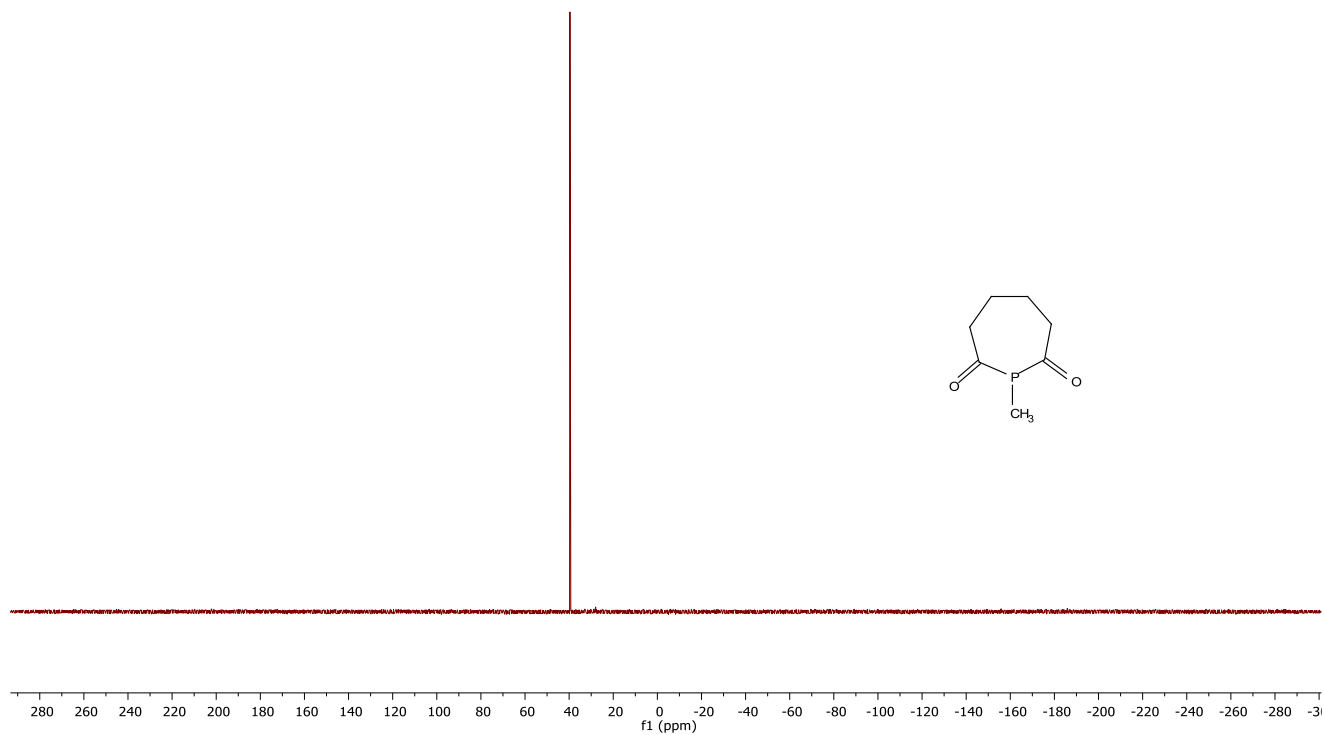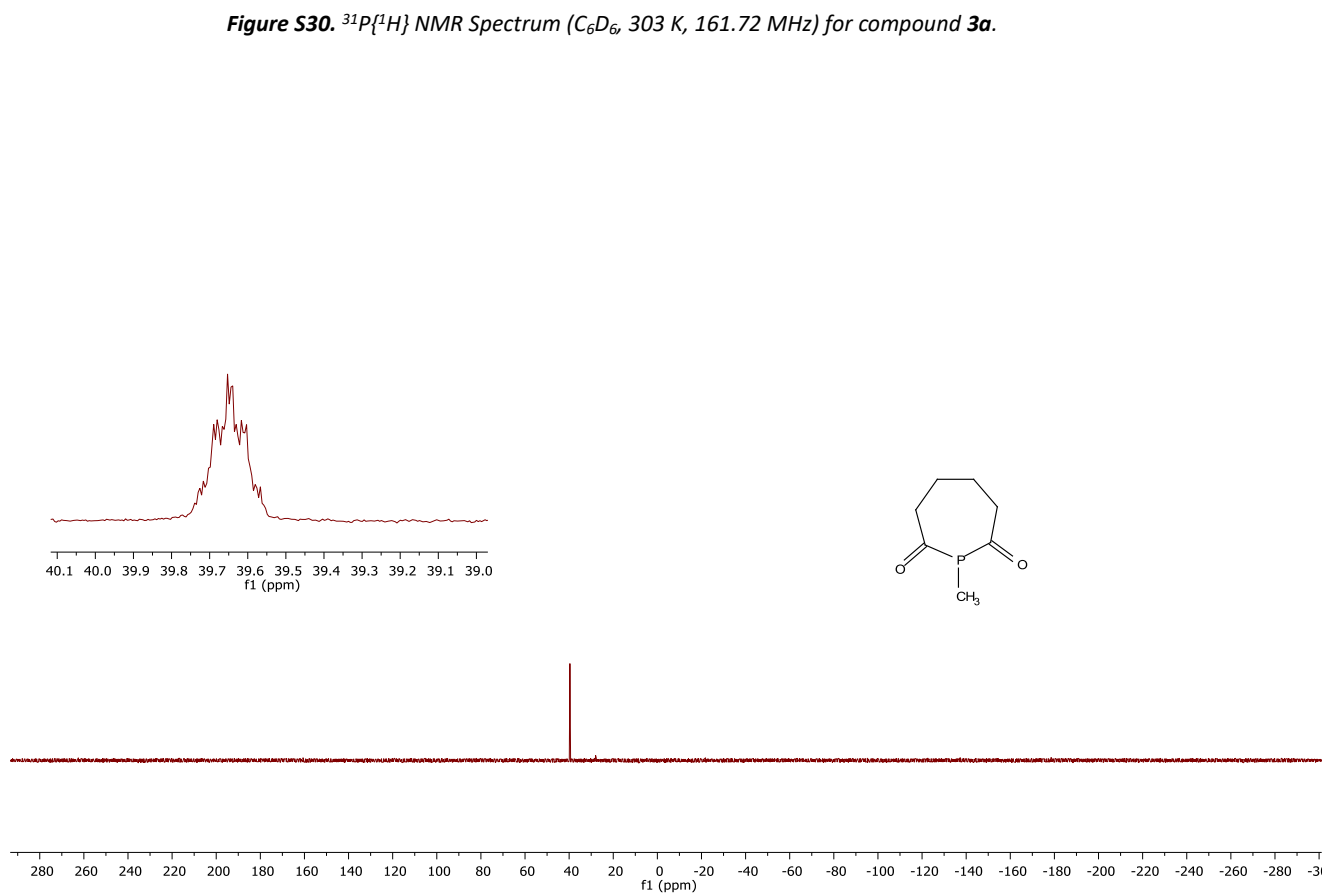

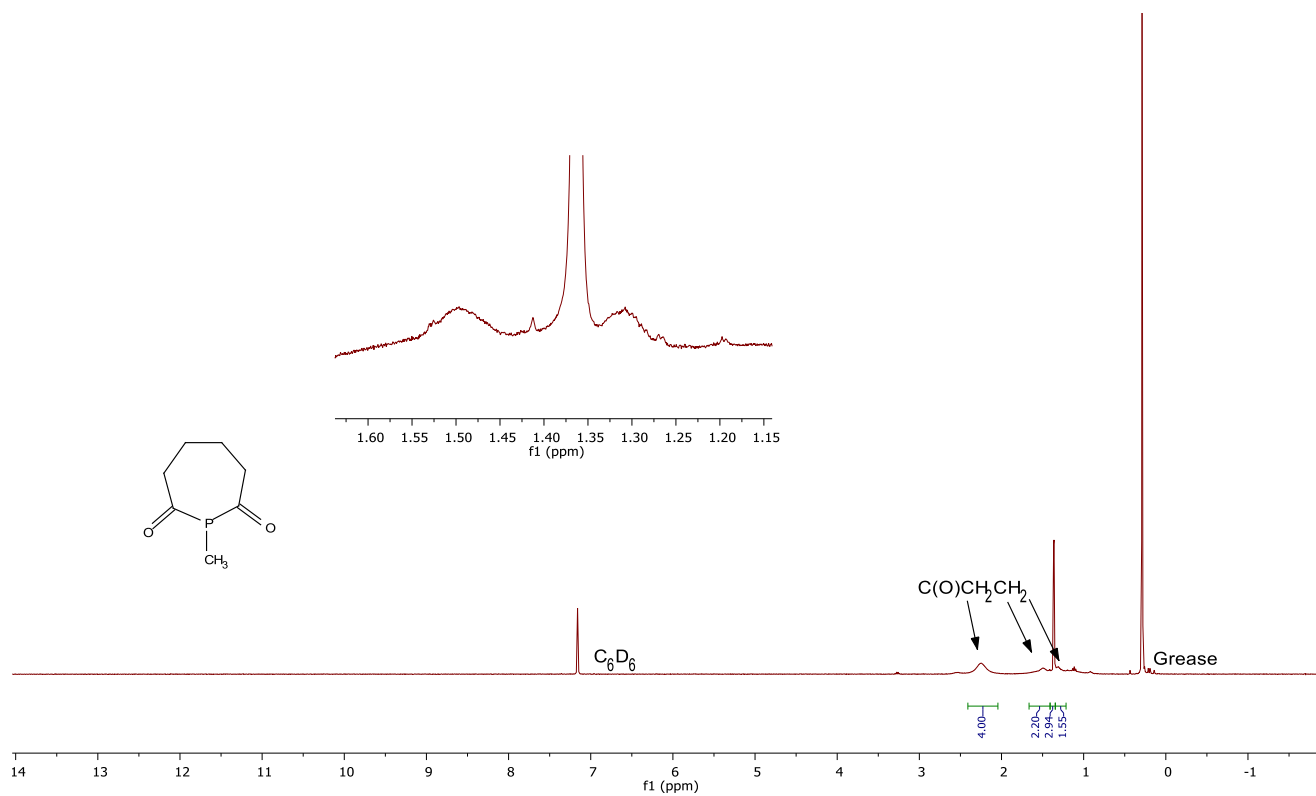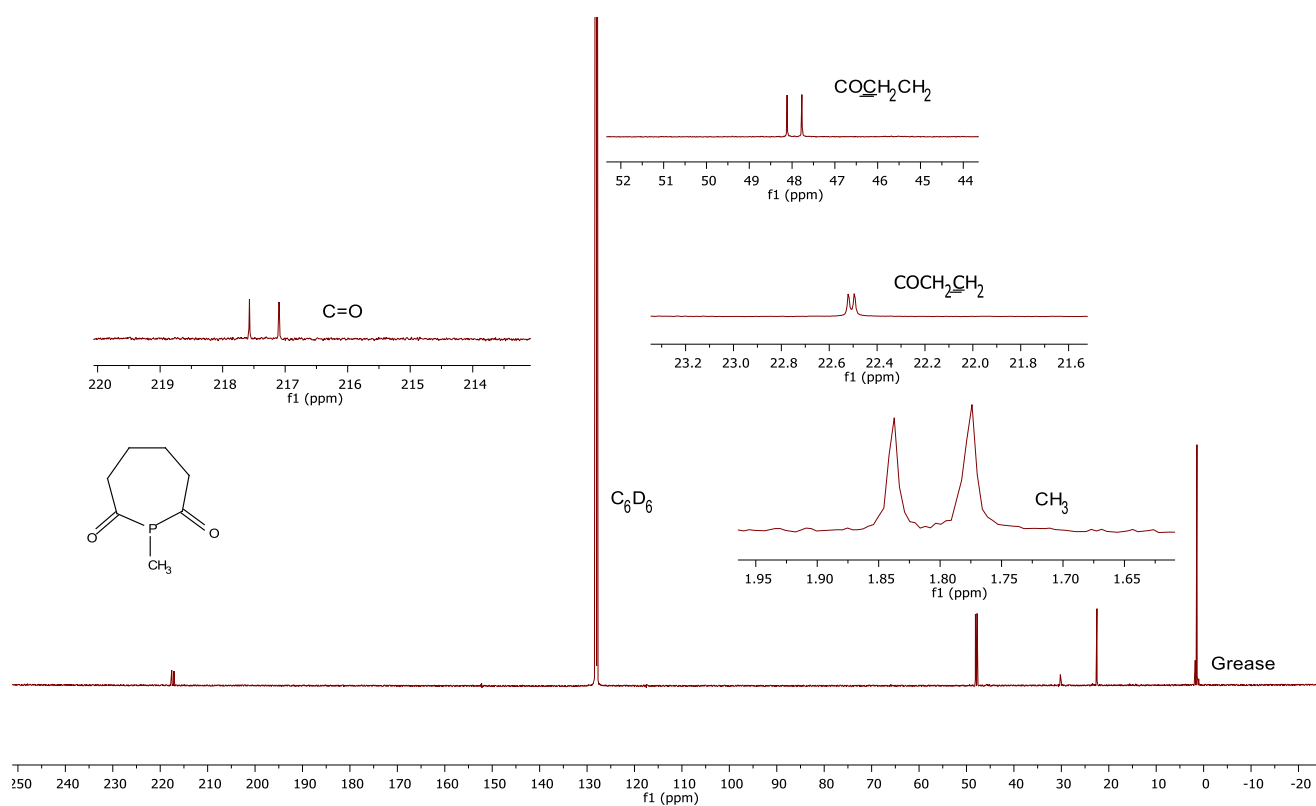

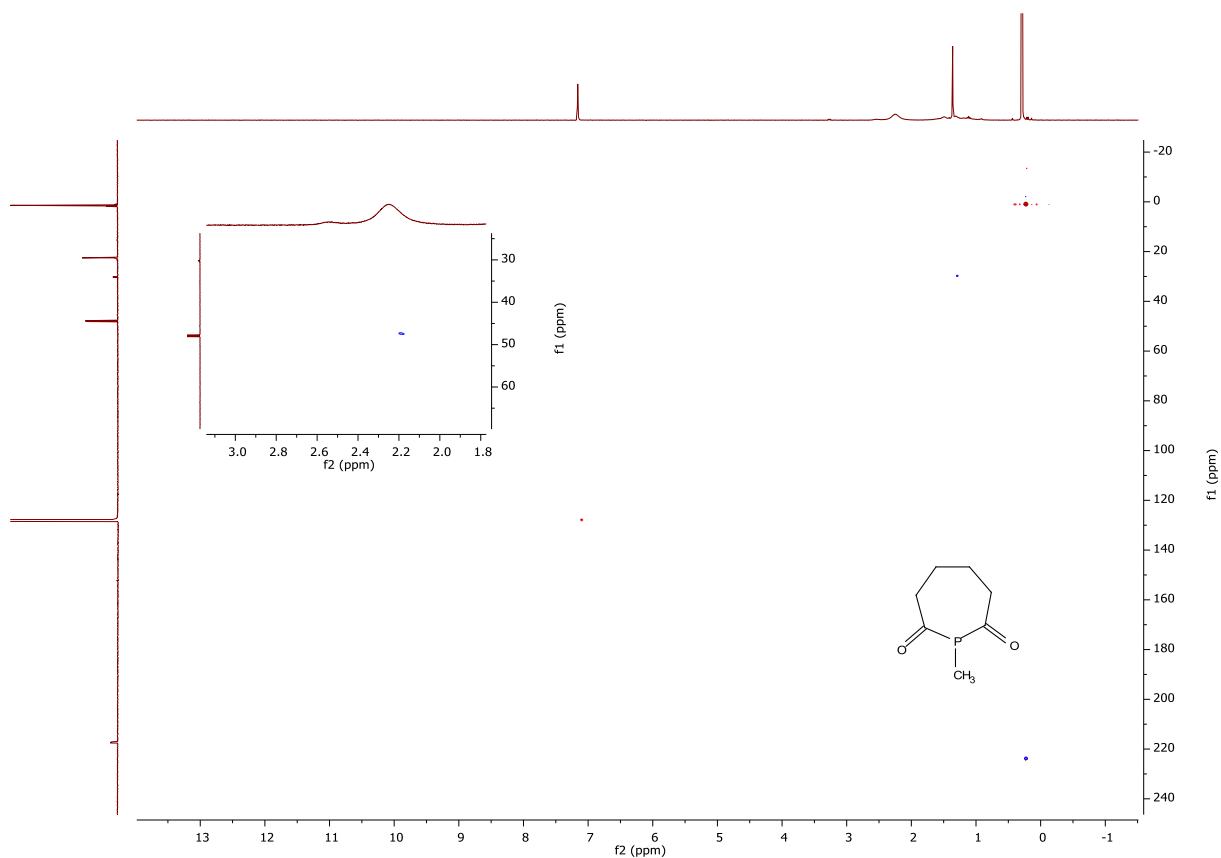

**Figure S34.**  $^1\text{H}$ - $^{13}\text{C}$  HSQC trace ( $\text{C}_6\text{D}_6$ , 303 K, 399.49, 100.46 MHz) for Compound **3a**.

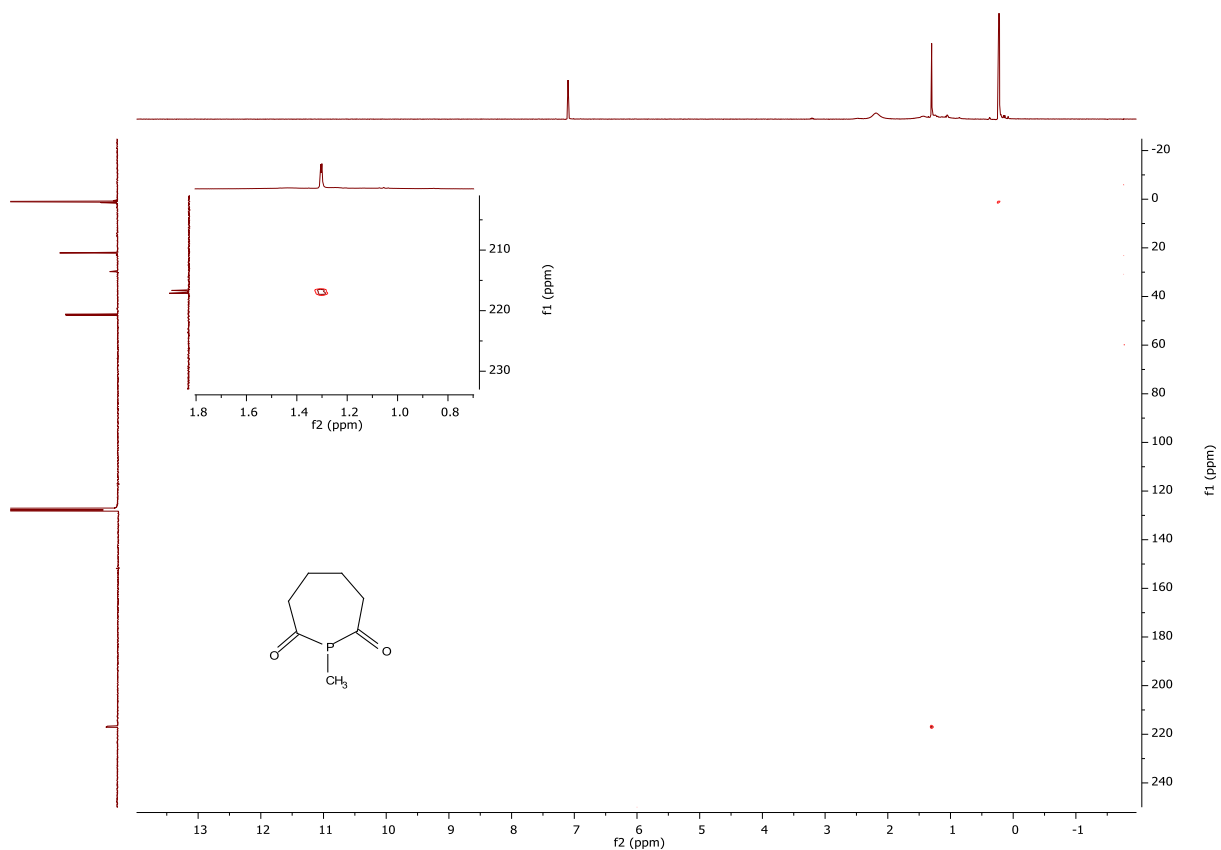

**Figure S35.**  $^1\text{H}$ - $^{13}\text{C}$  HMBC trace ( $\text{C}_6\text{D}_6$ , 303 K, 399.49, 100.46 MHz) for Compound **3a**.

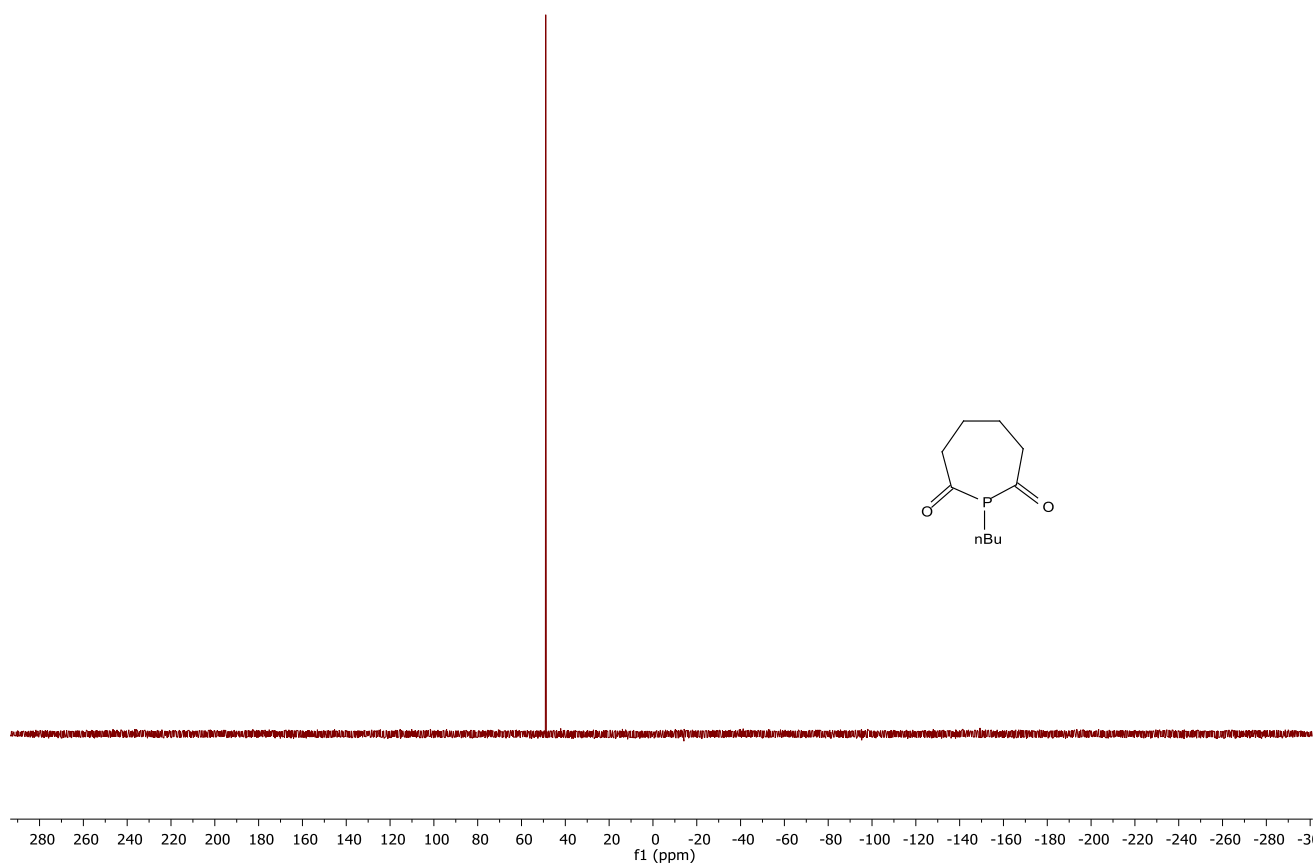

**Figure S36.**  $^{31}\text{P}\{^1\text{H}\}$  NMR Spectrum ( $\text{C}_6\text{D}_6$ , 303 K, 161.72 MHz) for compound **3b**.

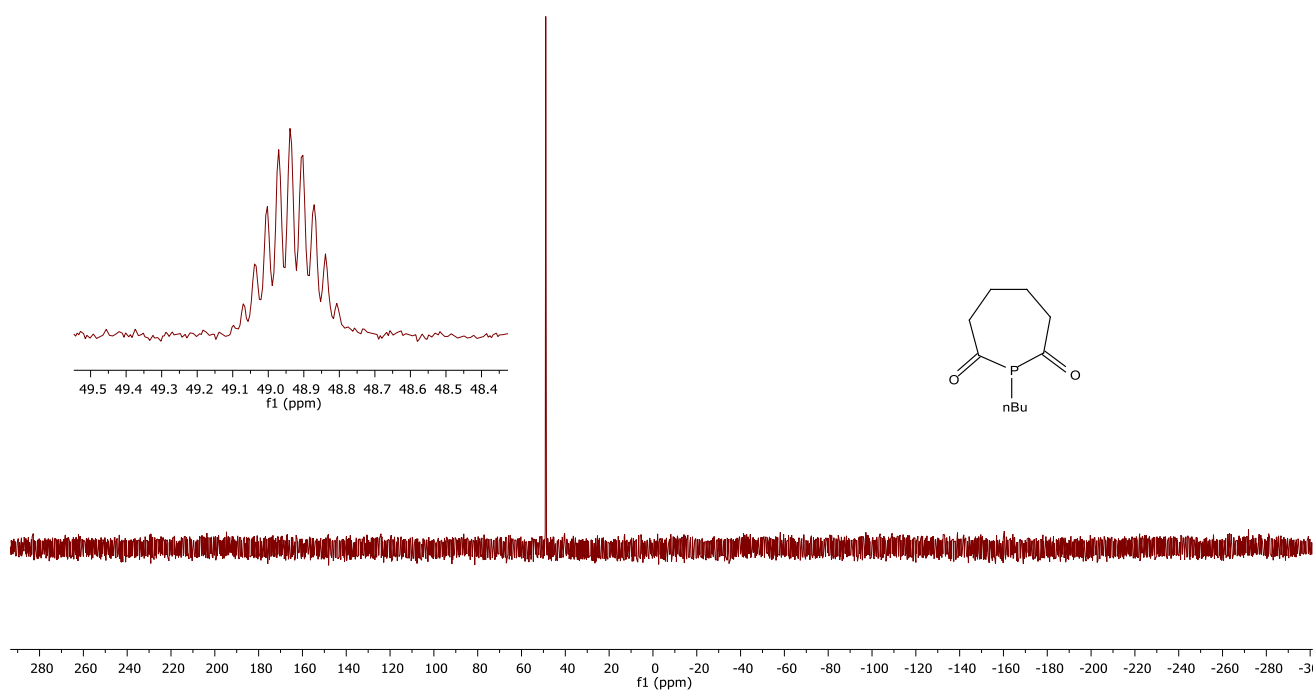

**Figure S37.**  $^{31}\text{P}$  NMR Spectrum ( $\text{C}_6\text{D}_6$ , 303 K, 161.72 MHz) for compound **3b**.

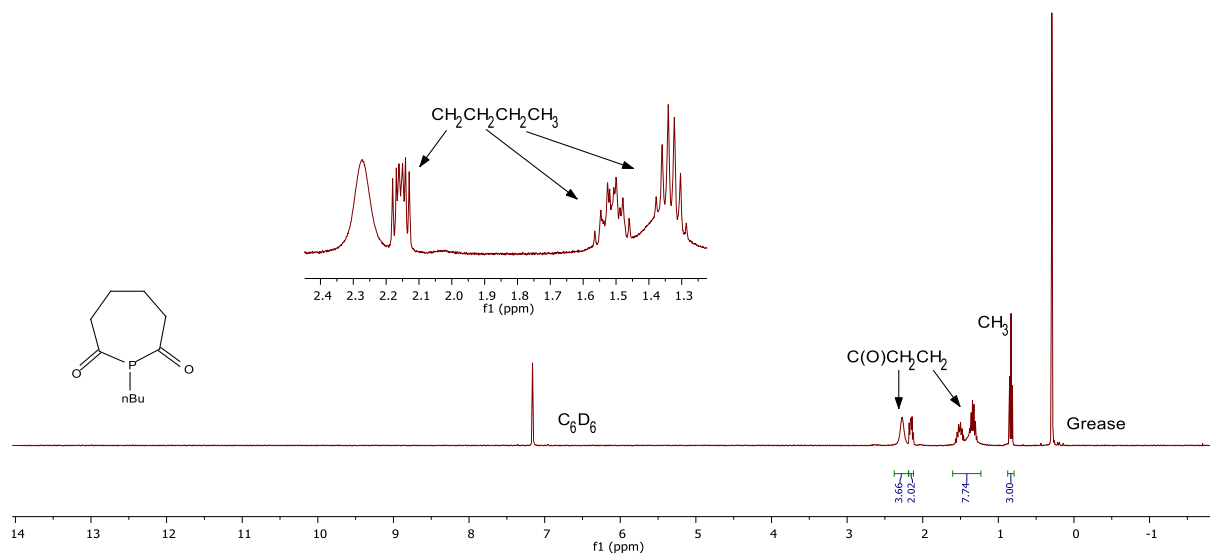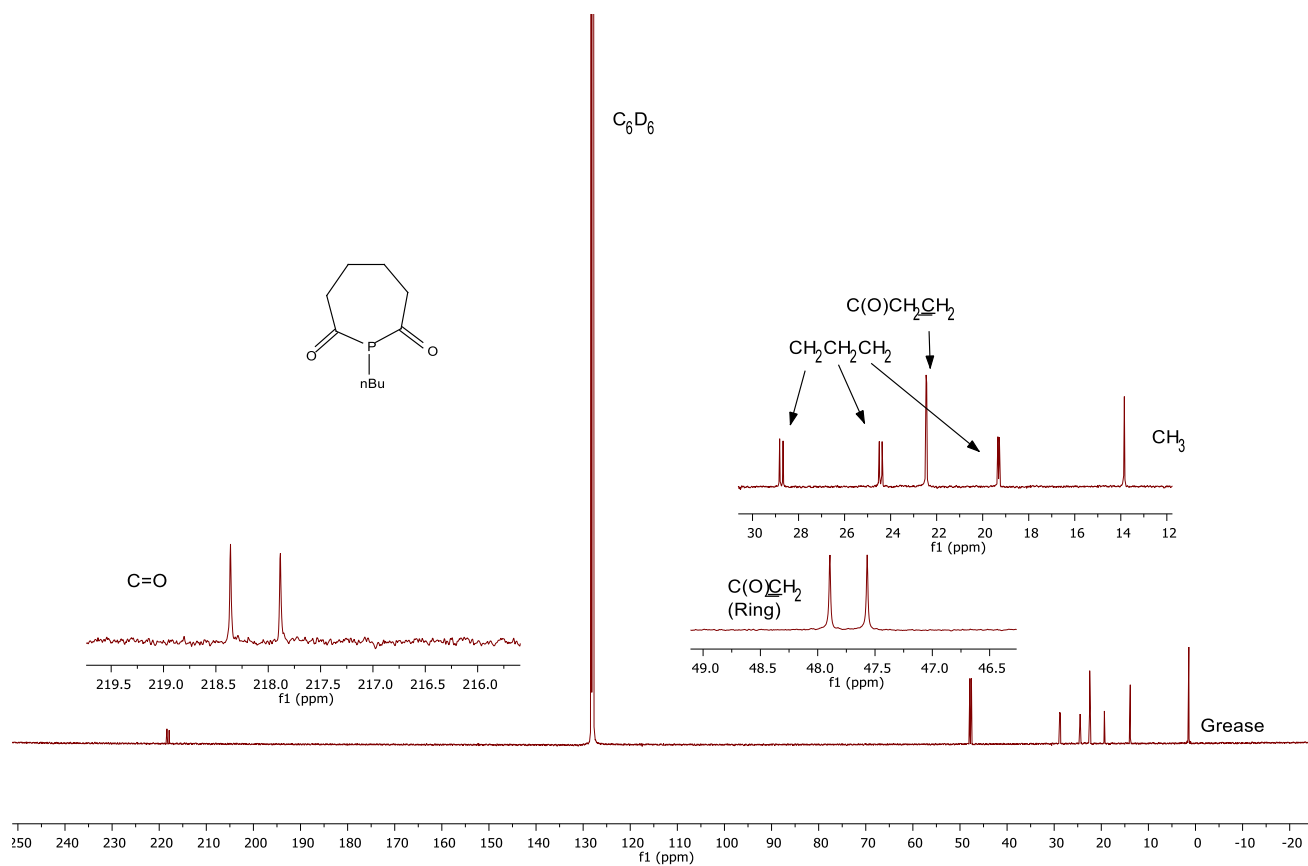

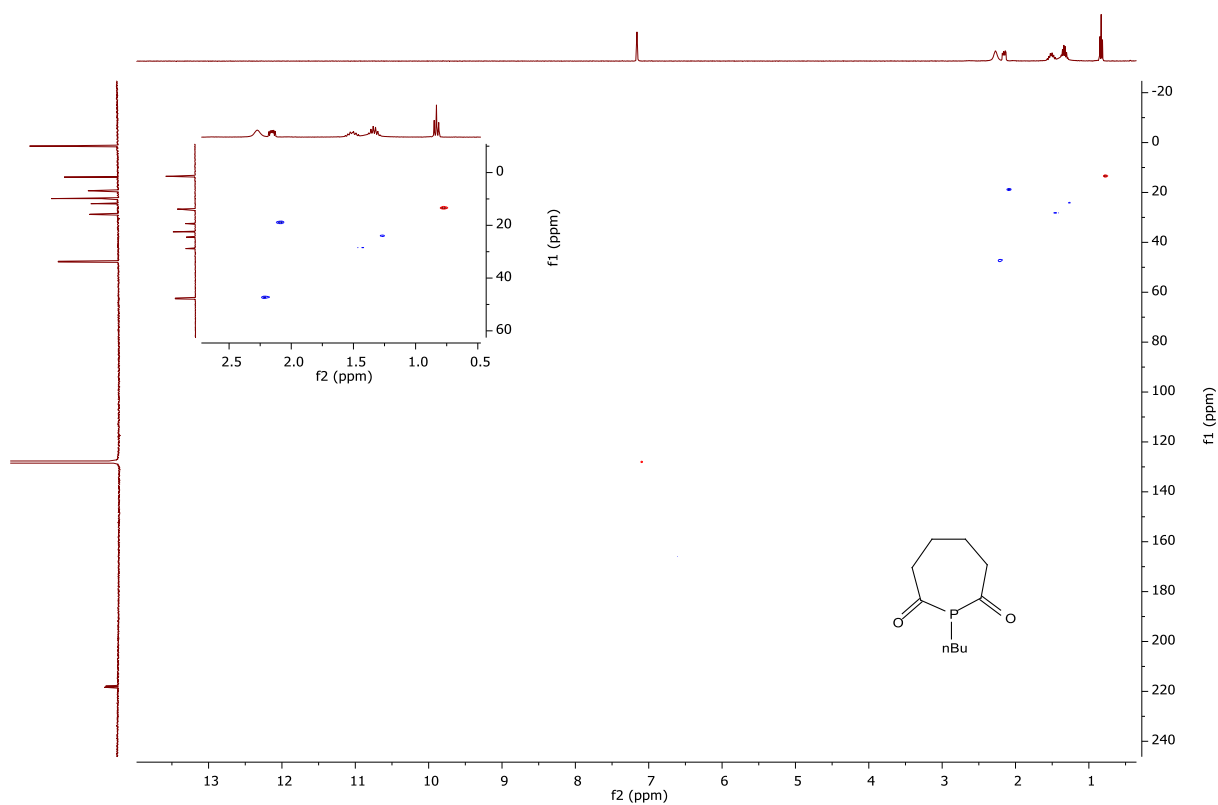

**Figure S40.**  $^1\text{H}$ - $^{13}\text{C}$  HSQC trace ( $\text{C}_6\text{D}_6$ , 303 K, 399.49, 100.46 MHz) for Compound **3b**.

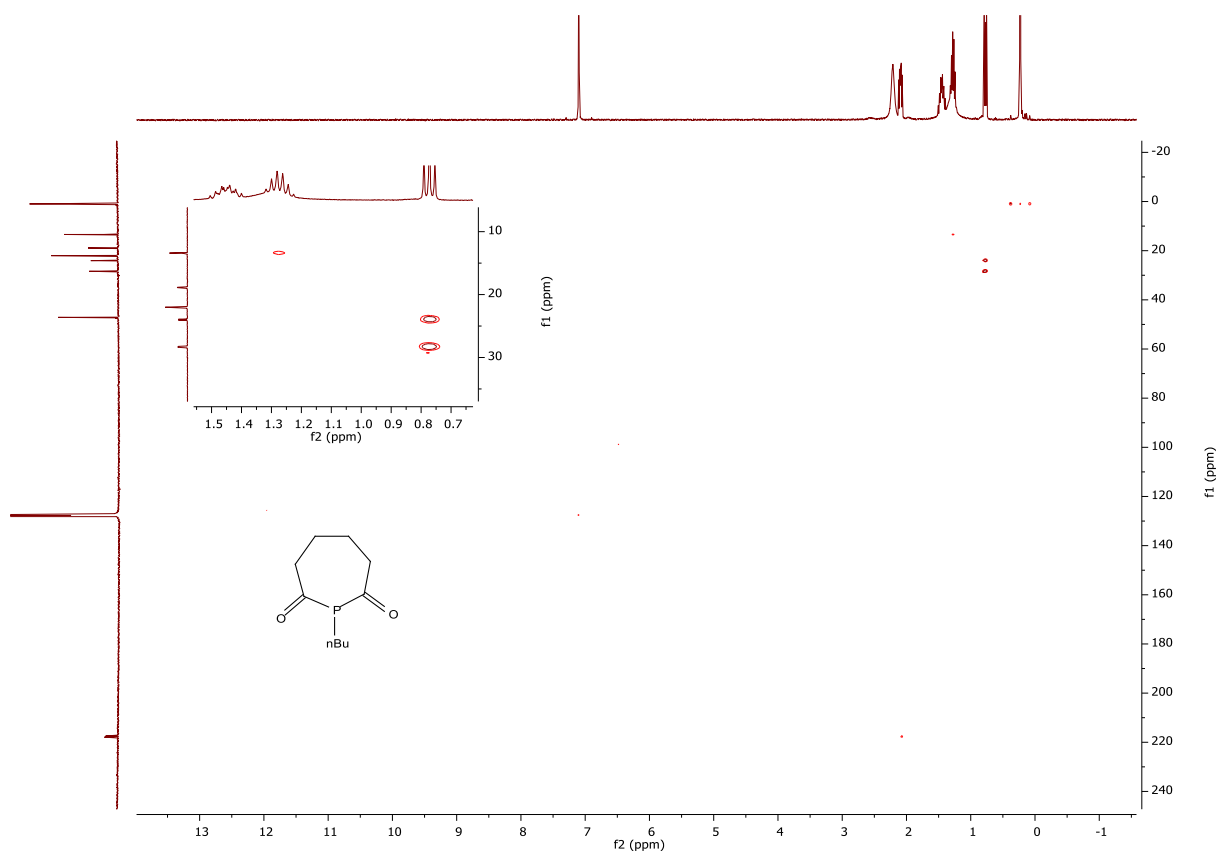

**Figure S41.**  $^1\text{H}$ - $^{13}\text{C}$  HMBC trace ( $\text{C}_6\text{D}_6$ , 303 K, 399.49, 100.46 MHz) for Compound **3b**.

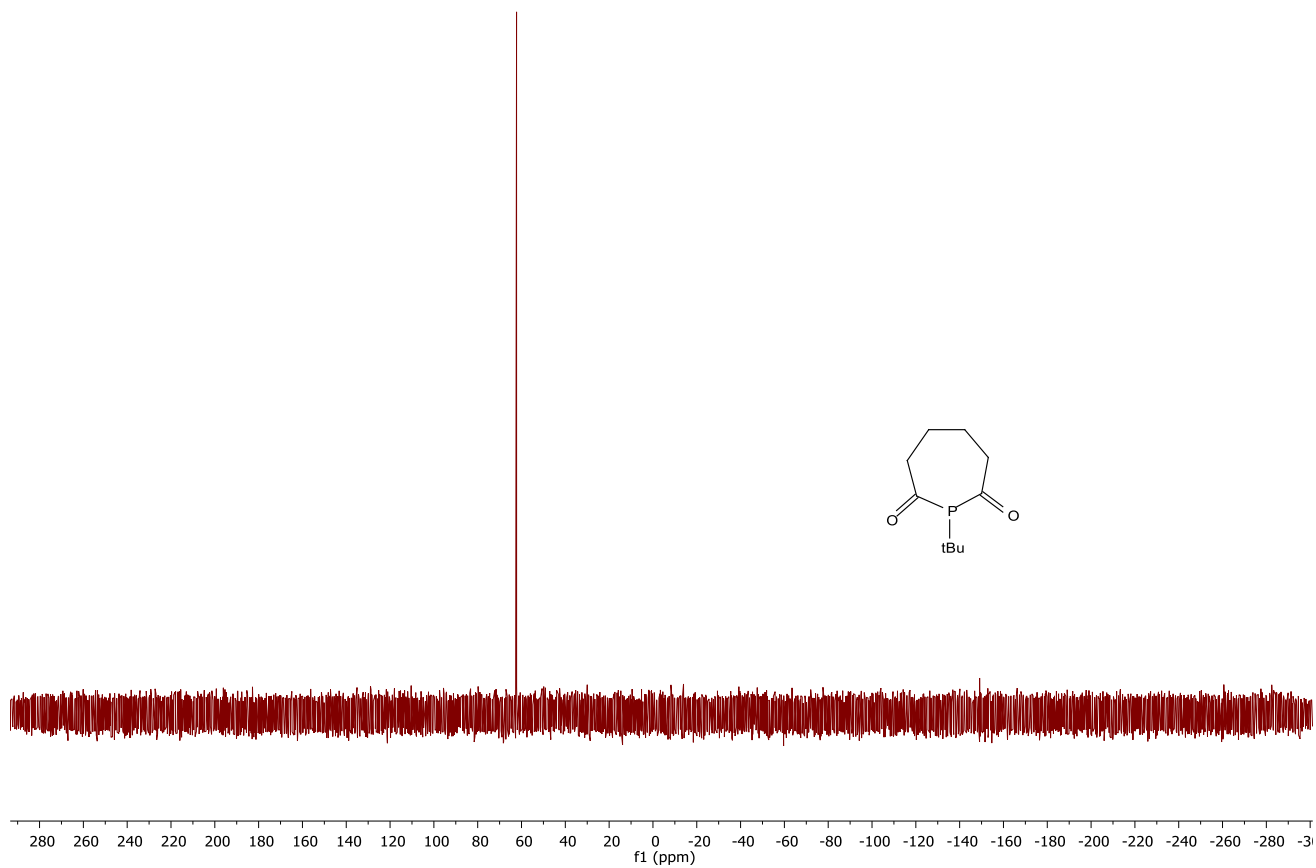

**Figure S42.**  $^{31}\text{P}\{^1\text{H}\}$  NMR Spectrum ( $\text{CDCl}_3$ , 303 K, 161.72 MHz) for compound **3c**.

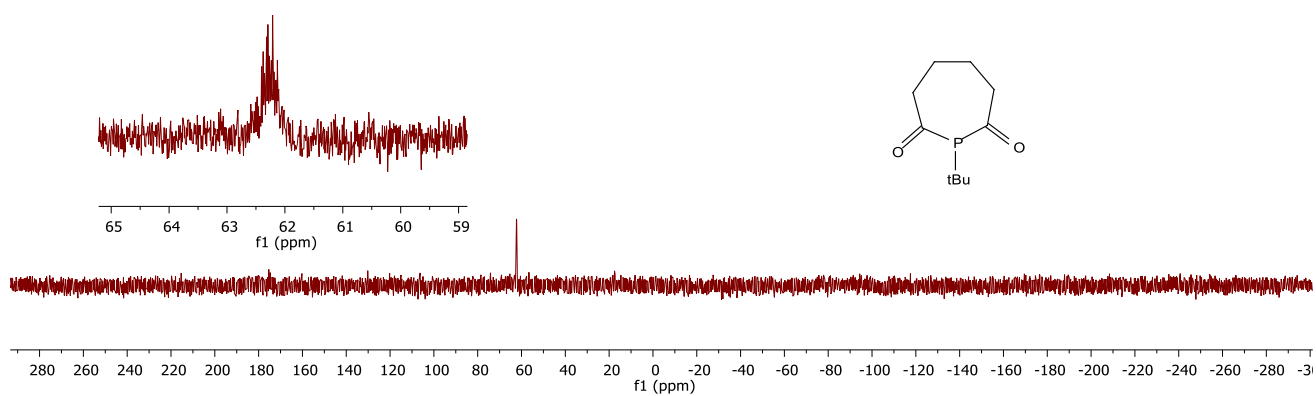

**Figure S43.**  $^{31}\text{P}$  NMR Spectrum ( $\text{CDCl}_3$ , 303 K, 161.72 MHz) for compound **3c**.

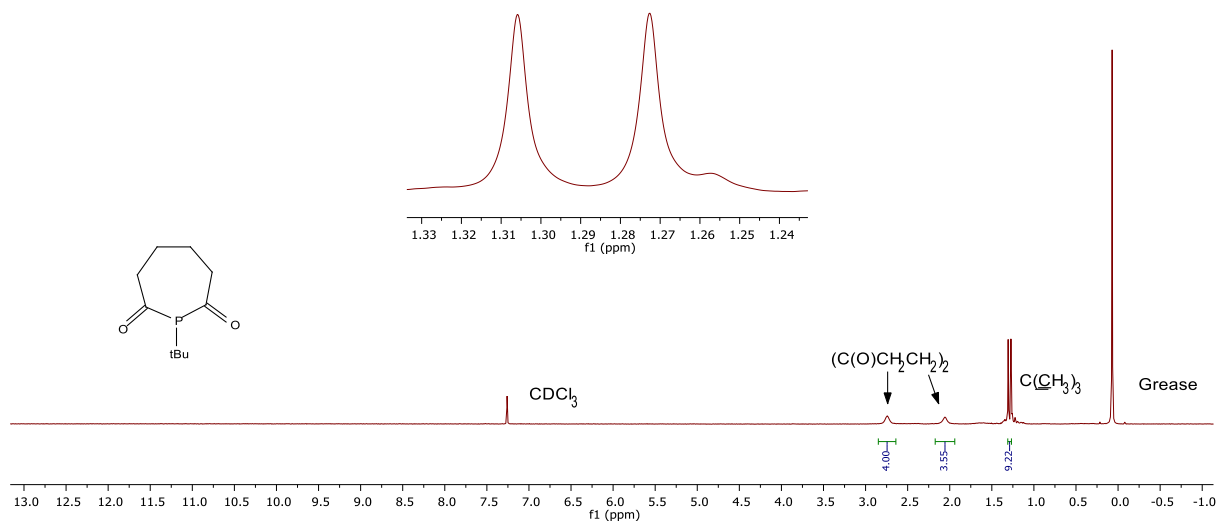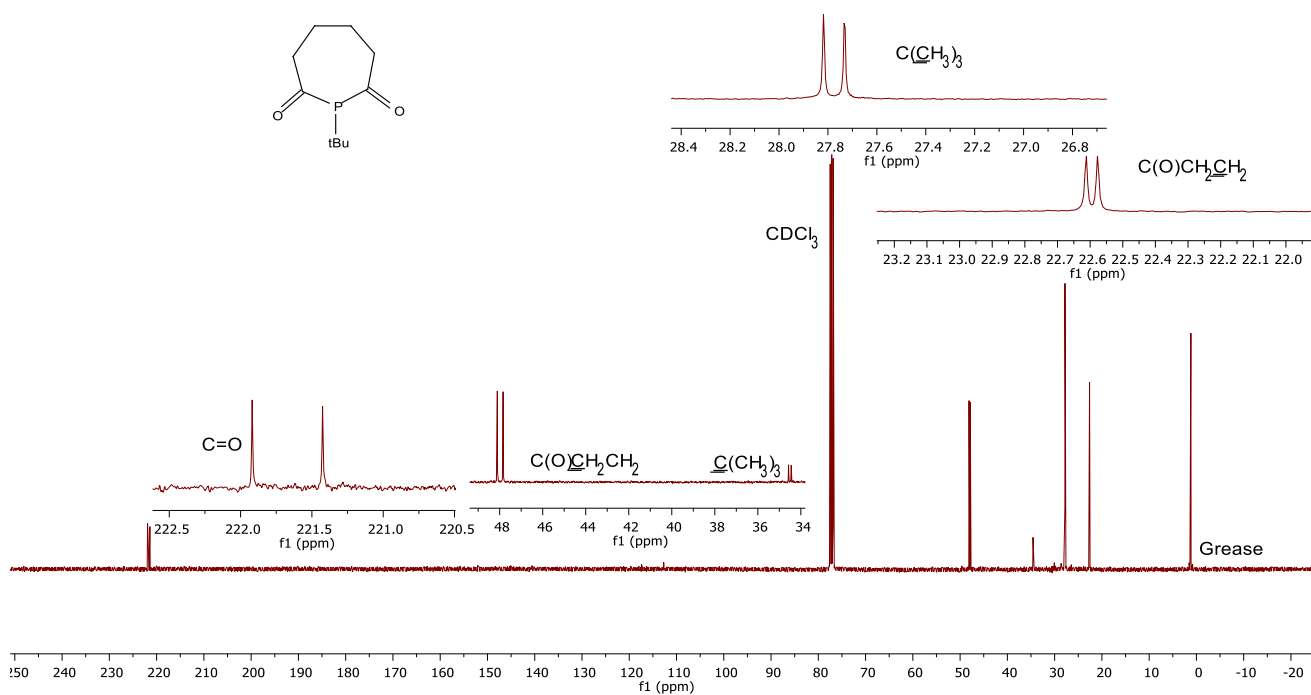



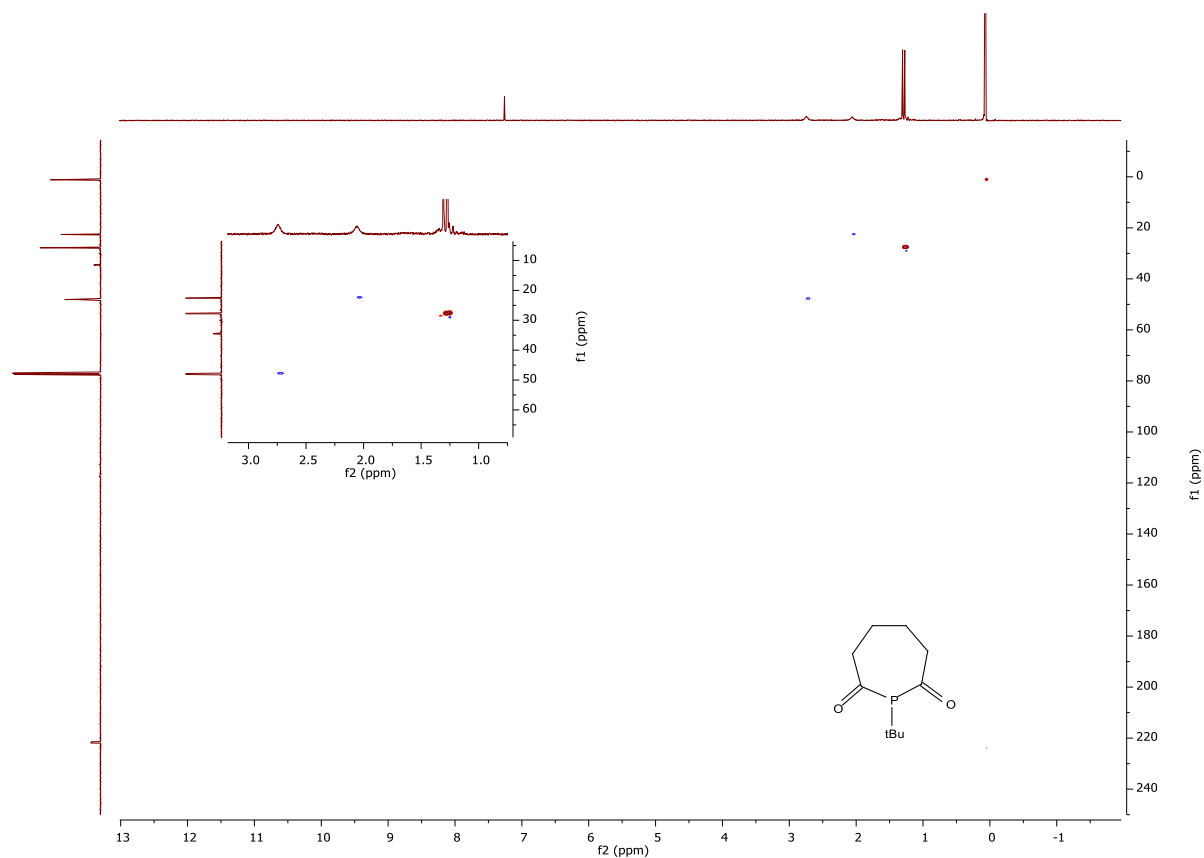

**Figure S46.**  $^1\text{H}$ - $^{13}\text{C}$  HSQC trace ( $\text{CDCl}_3$ , 303 K, 399.49, 100.46 MHz) for Compound **3c**.

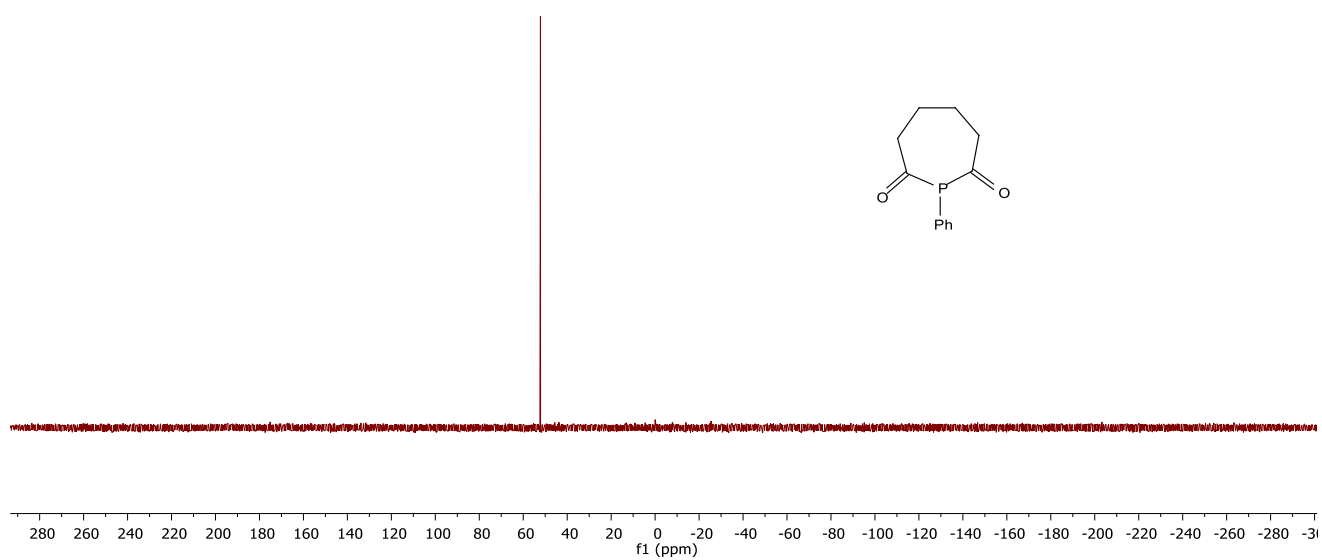

**Figure S47.**  $^{31}\text{P}\{^1\text{H}\}$  NMR Spectrum ( $\text{CDCl}_3$ , 303 K, 161.72 MHz) for compound **3d**.

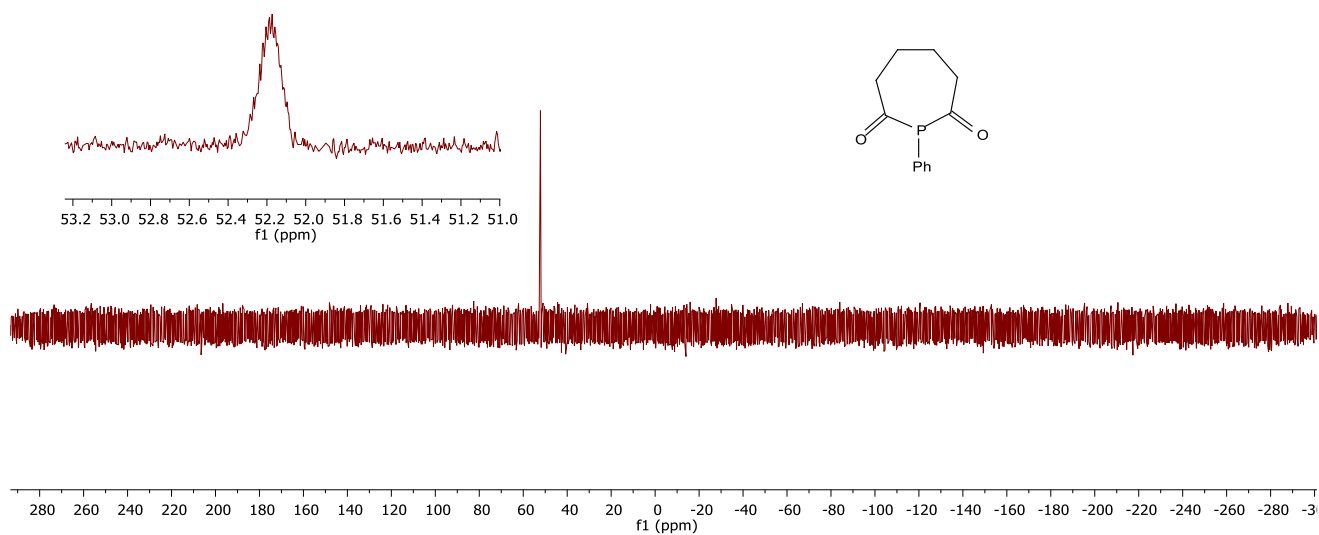

**Figure S48.**  $^{31}\text{P}$  NMR Spectrum ( $\text{CDCl}_3$ , 303 K, 161.72 MHz) for compound **3d**.

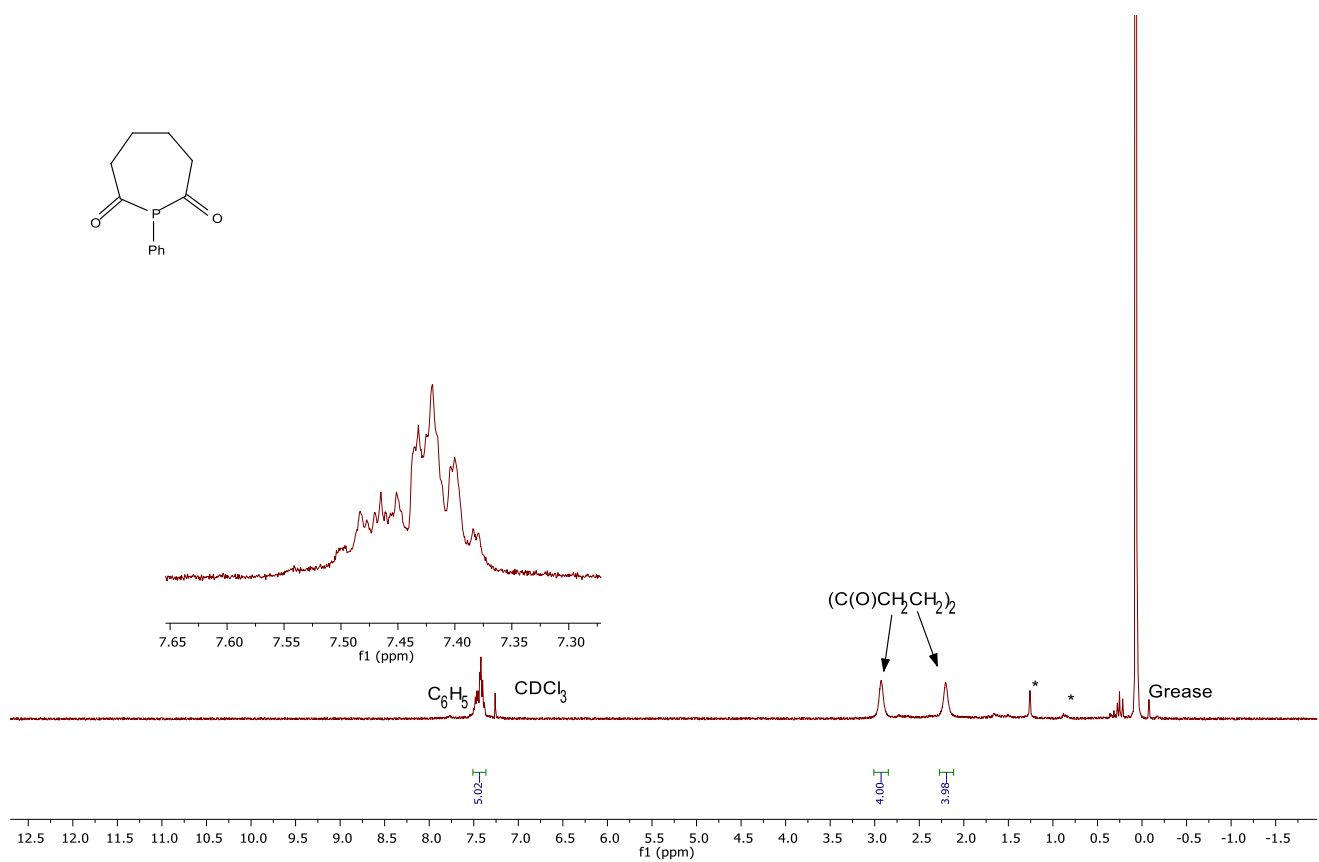

**Figure S49.**  $^1\text{H}$  NMR Spectrum ( $\text{CDCl}_3$ , 303 K, 399.49 MHz) for compound **3d**. \* corresponds to H Grease.

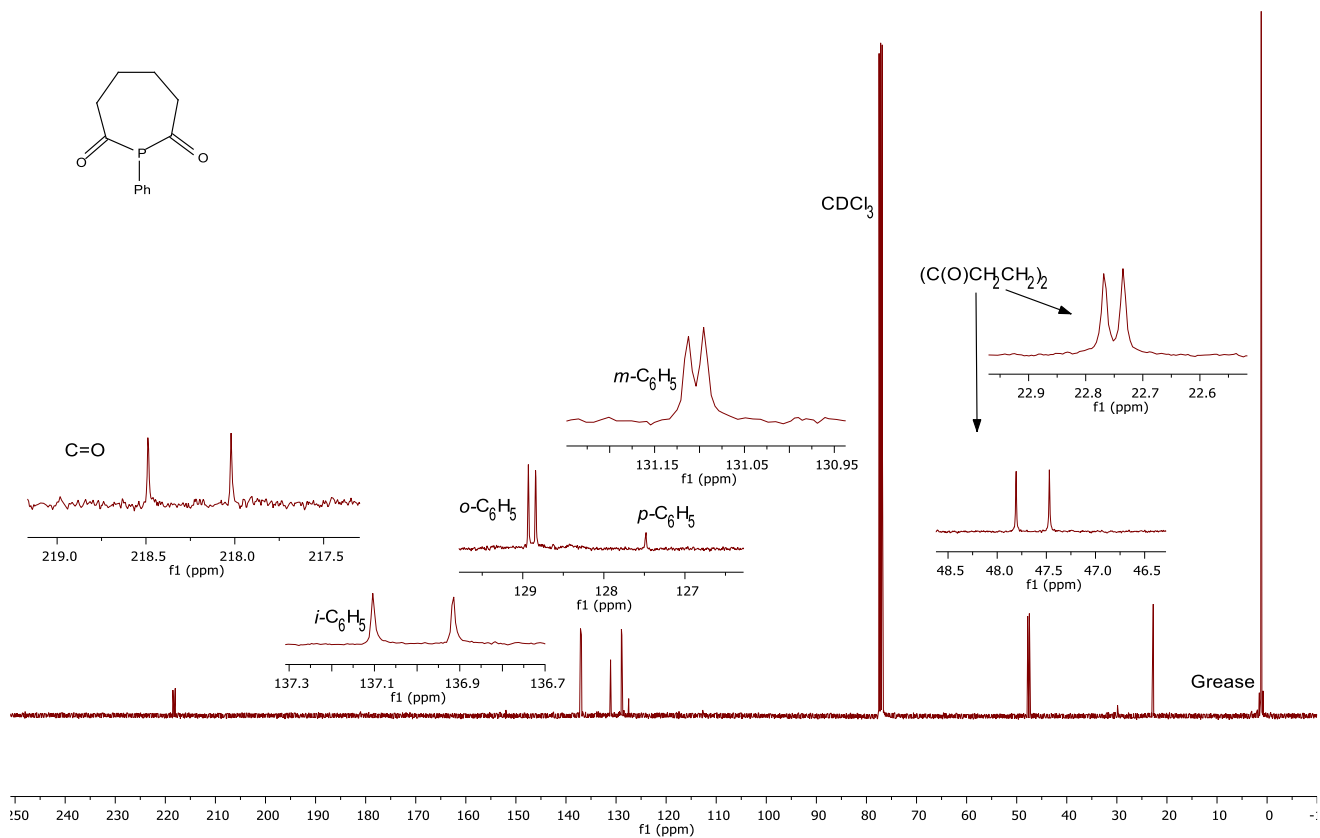

Figure S50.  $^{13}\text{C}\{^1\text{H}\}$  NMR Spectrum ( $\text{CDCl}_3$ , 303 K, 100.46 MHz) for compound 3d.

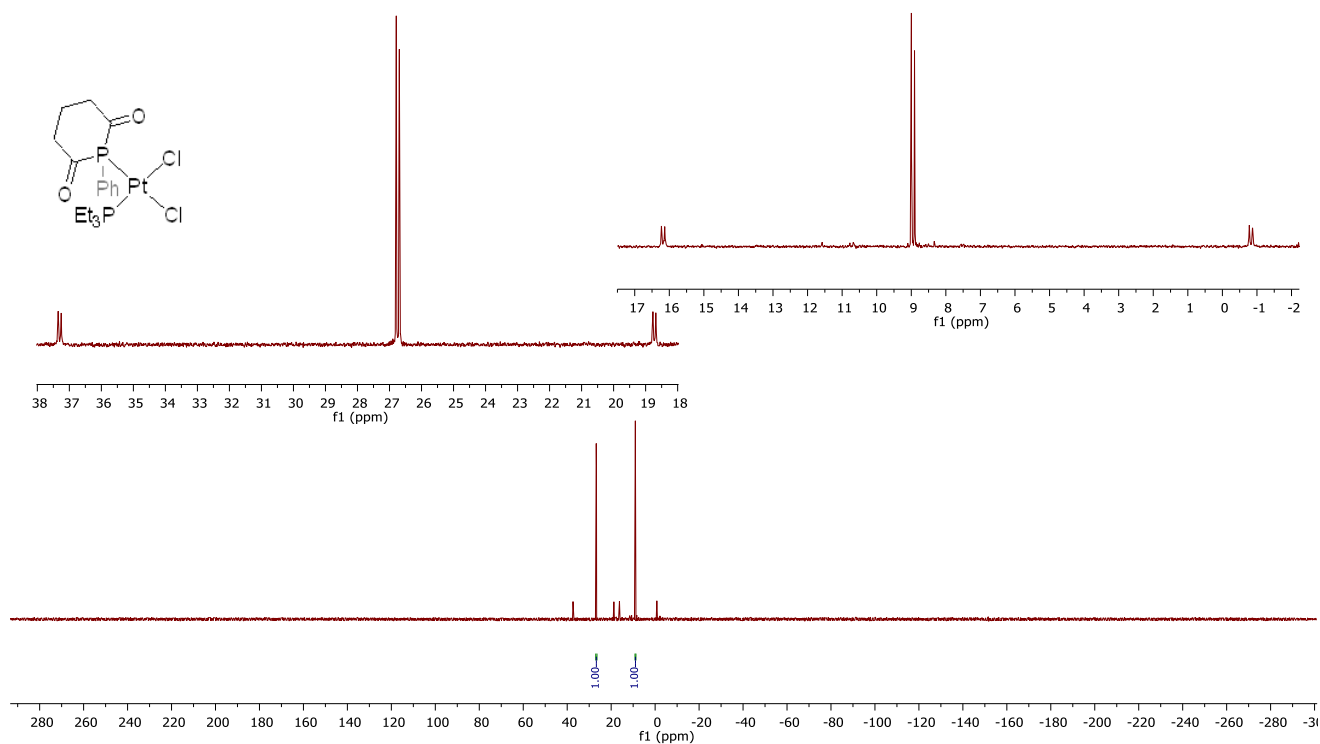

Figure S51.  $^{31}\text{P}\{^1\text{H}\}$  NMR Spectrum ( $\text{CD}_2\text{Cl}_2$ , 303 K, 161.72 MHz, D1 = 30 s) for compound 4.

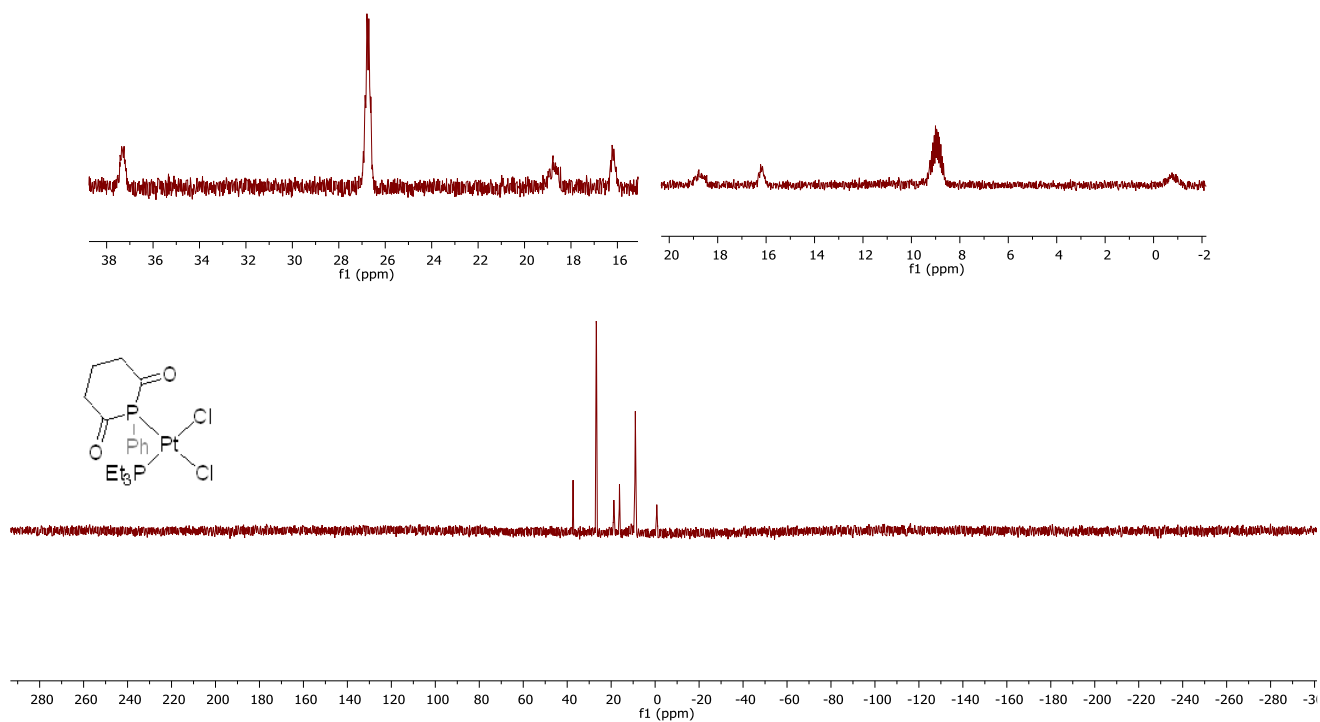

Figure S52.  $^{31}\text{P}$  NMR Spectrum ( $\text{CD}_2\text{Cl}_2$ , 303 K, 161.72 MHz,  $D1 = 30$  s) for compound 4.

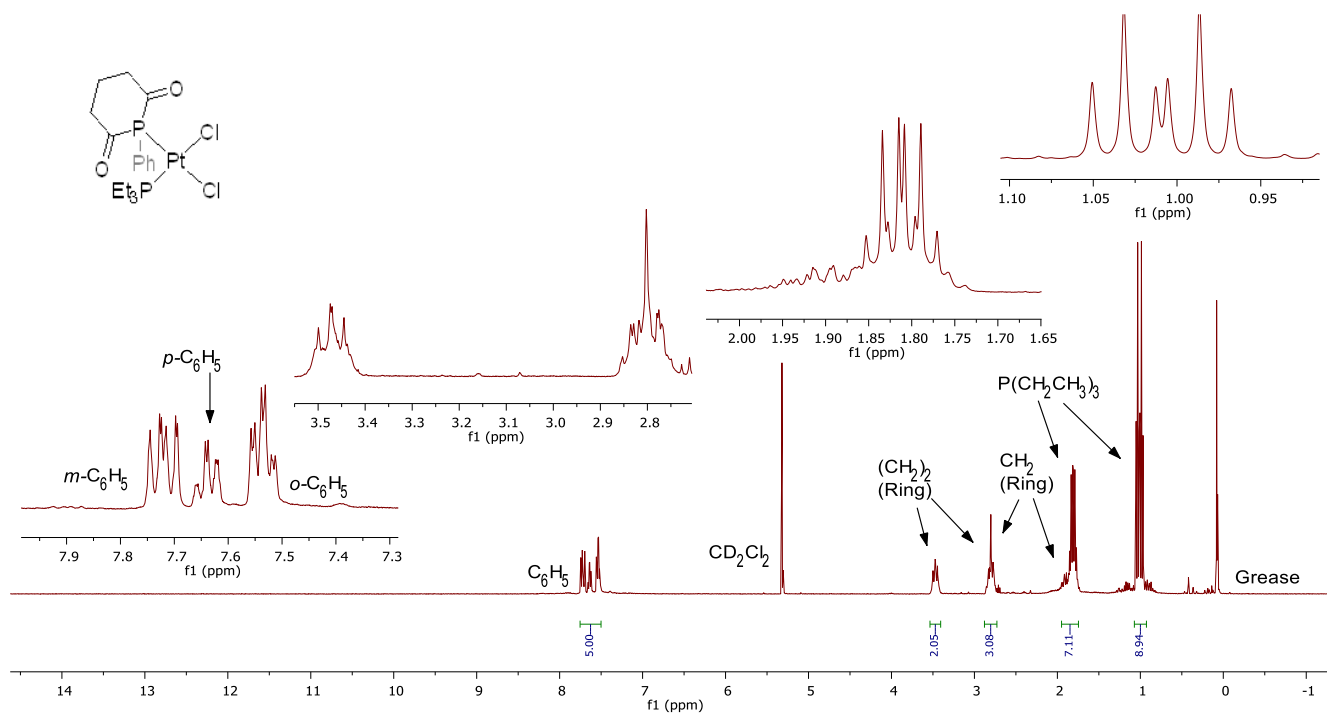

Figure S53.  $^1\text{H}$  NMR Spectrum ( $\text{CD}_2\text{Cl}_2$ , 303 K, 399.49 MHz) for compound 4.

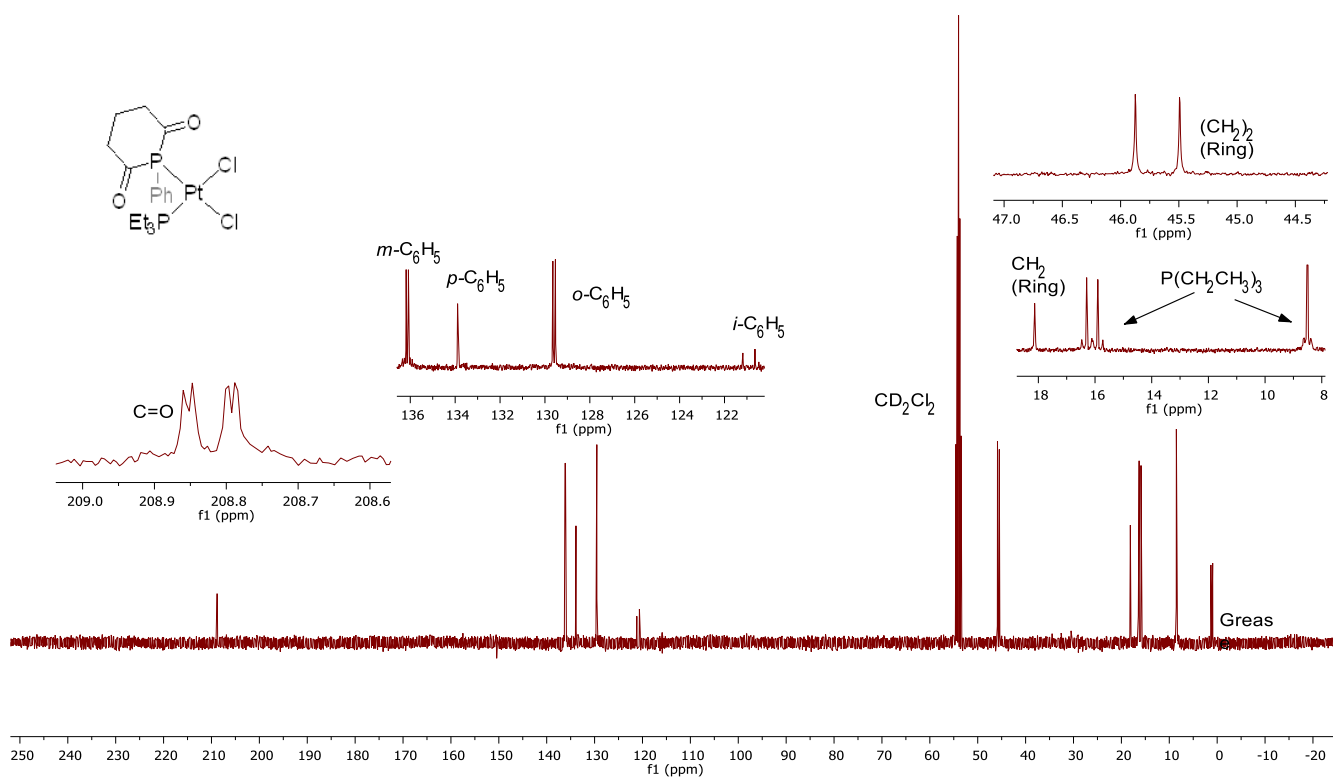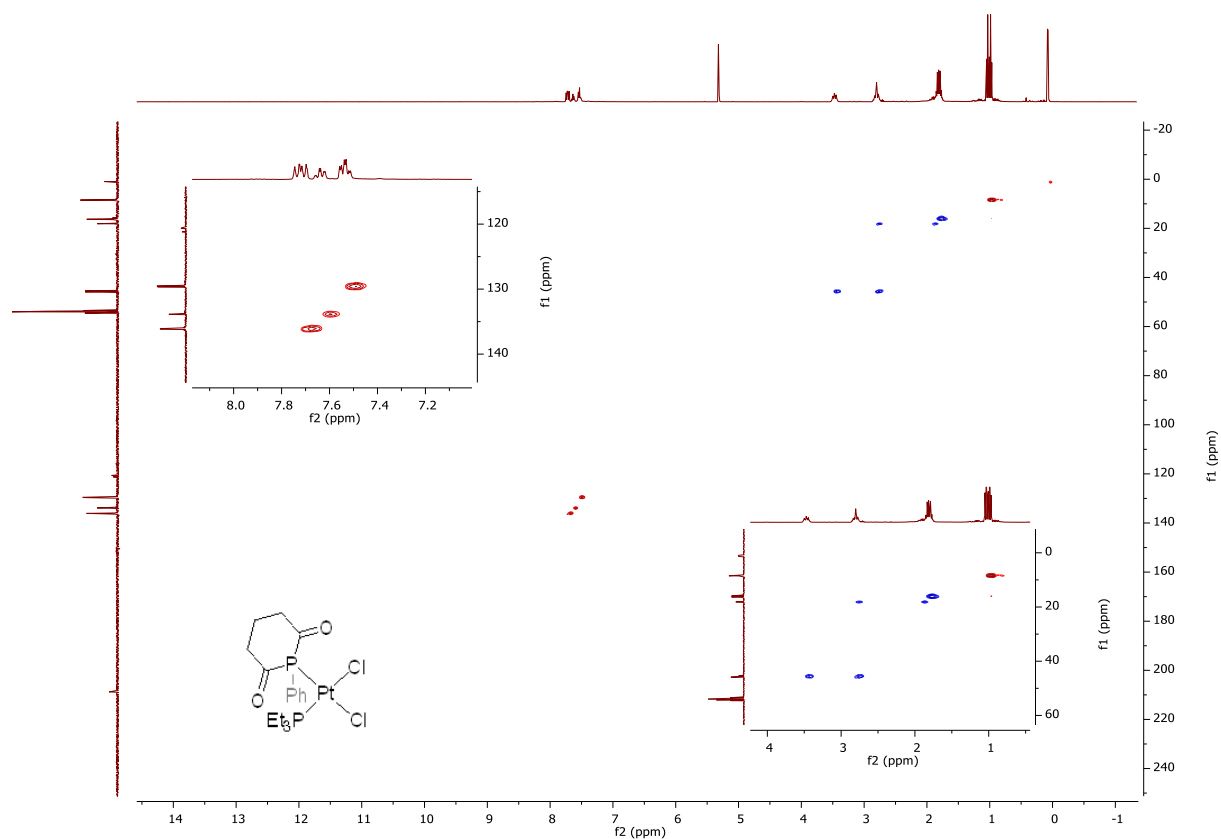

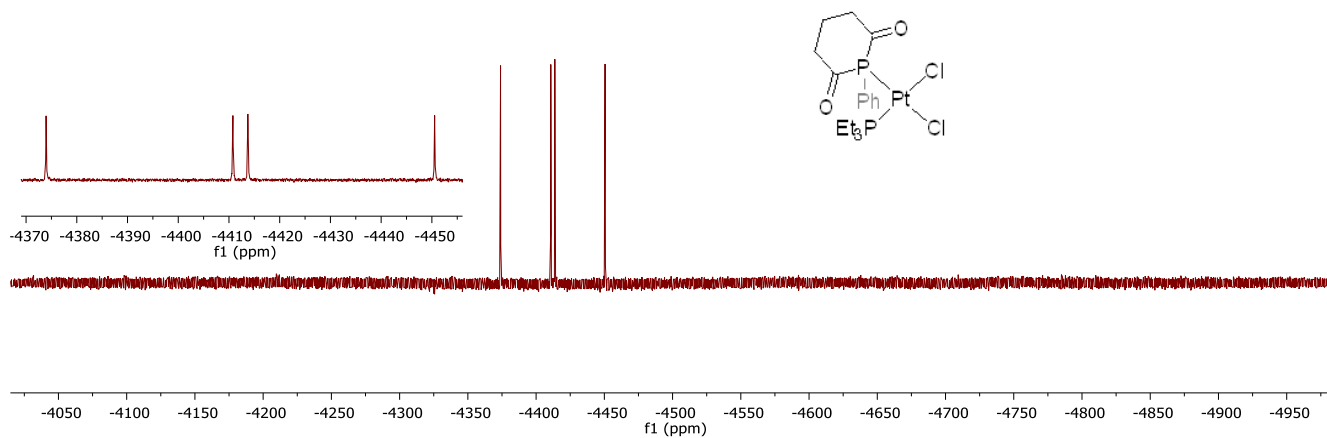

**Figure S56.**  $^{195}\text{Pt}\{^1\text{H}\}$  NMR Spectrum ( $\text{CD}_2\text{Cl}_2$ , 303 K, 85.49 MHz) for Compound 4.

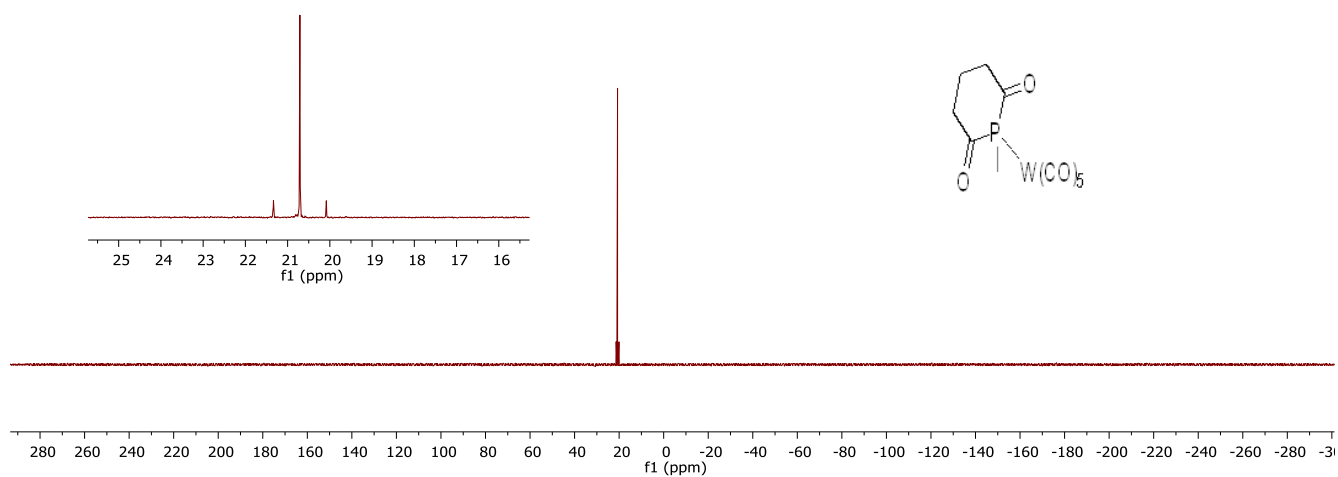

**Figure S57.**  $^{31}\text{P}\{^1\text{H}\}$  NMR Spectrum ( $\text{C}_6\text{D}_6$ , 303 K, 161.72 MHz) for compound 5a.

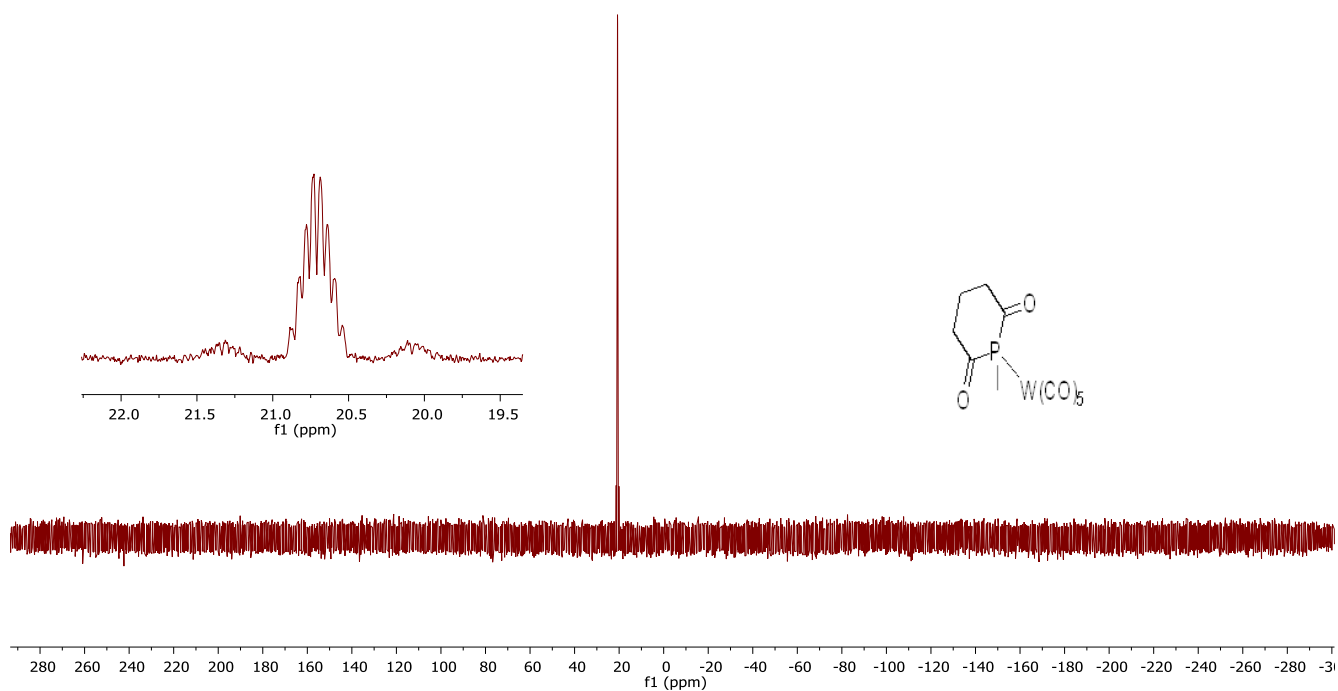

**Figure S58.**  $^{31}\text{P}$  NMR Spectrum ( $\text{C}_6\text{D}_6$ , 303 K, 161.72 MHz) for compound **5a**.

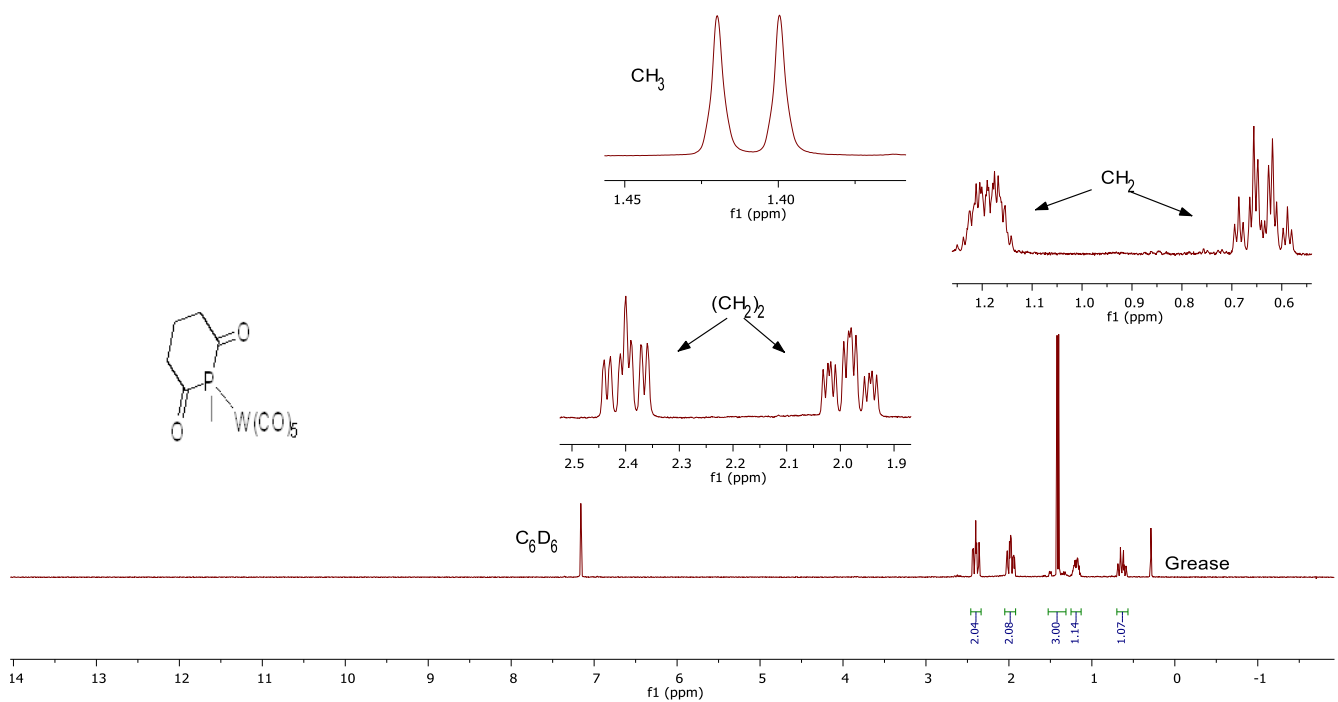

**Figure S59.**  $^1\text{H}$  NMR Spectrum ( $\text{C}_6\text{D}_6$ , 303 K, 399.49 MHz) for compound **5a**.

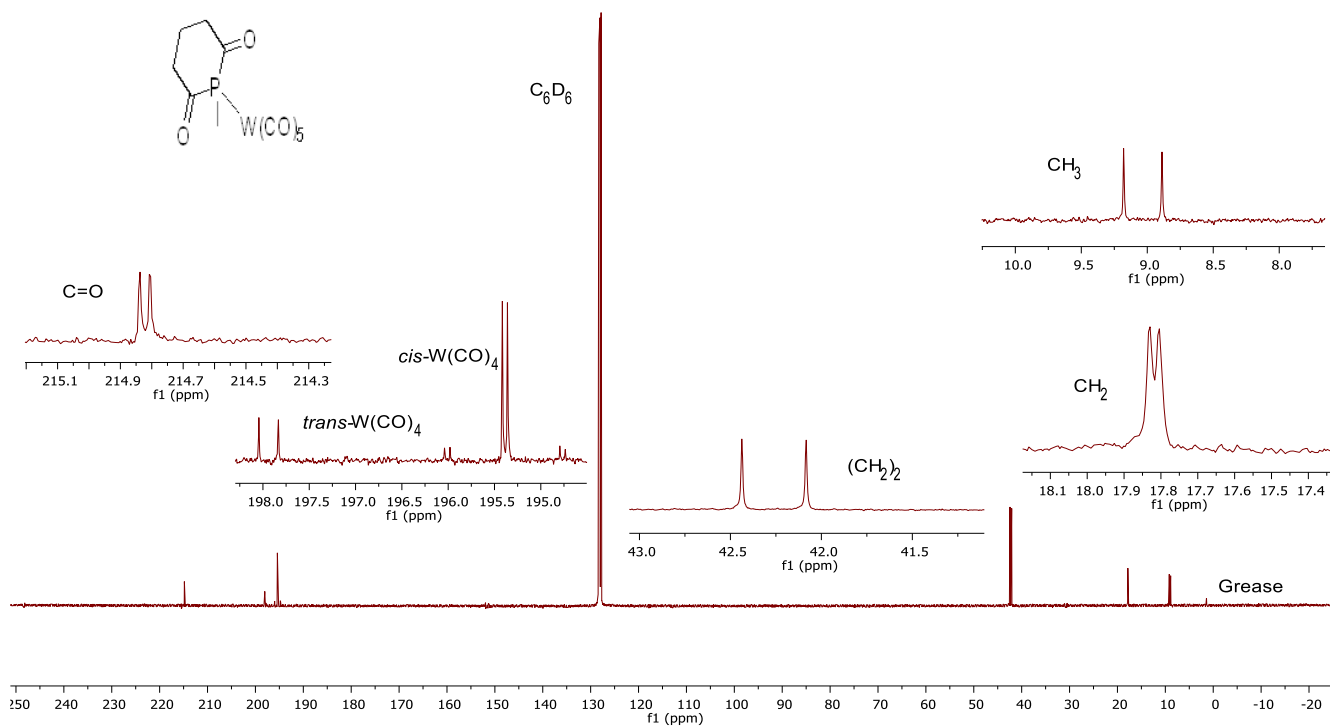

**Figure S60.**  $^{13}\text{C}\{^1\text{H}\}$  NMR Spectrum ( $\text{C}_6\text{D}_6$ , 303 K, 100.46 MHz) for compound **5a**.

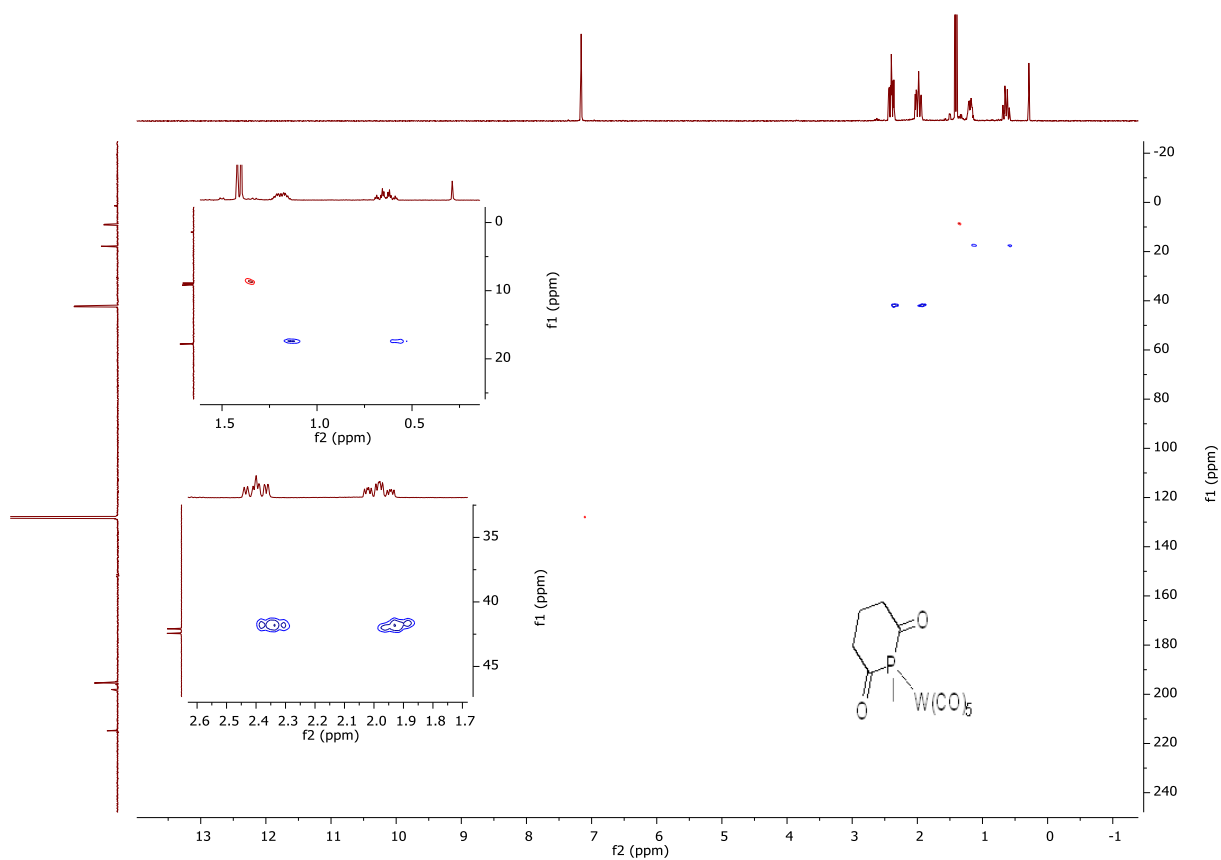

**Figure S61.**  $^1\text{H}$ - $^{13}\text{C}$  HSQC trace ( $\text{C}_6\text{D}_6$ , 303 K, 399.49, 100.46 MHz) for Compound **5a**.



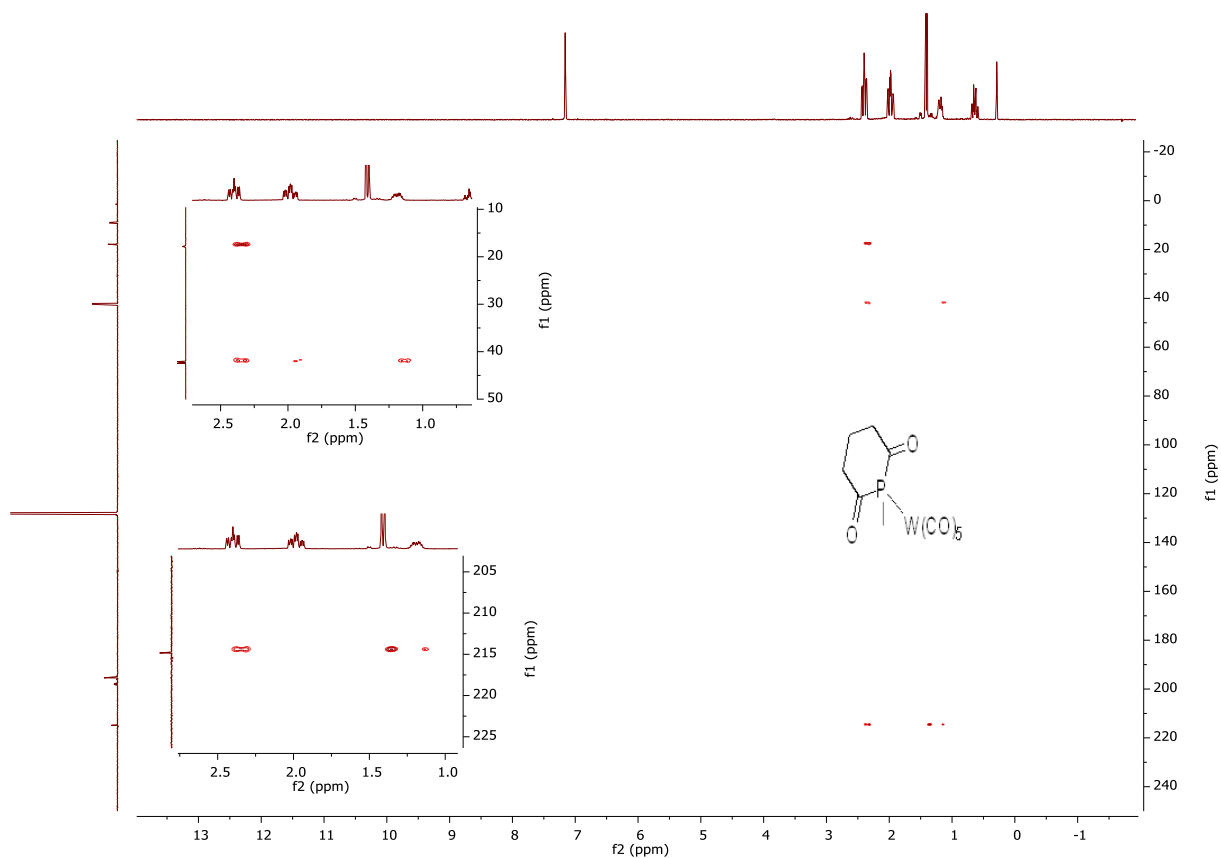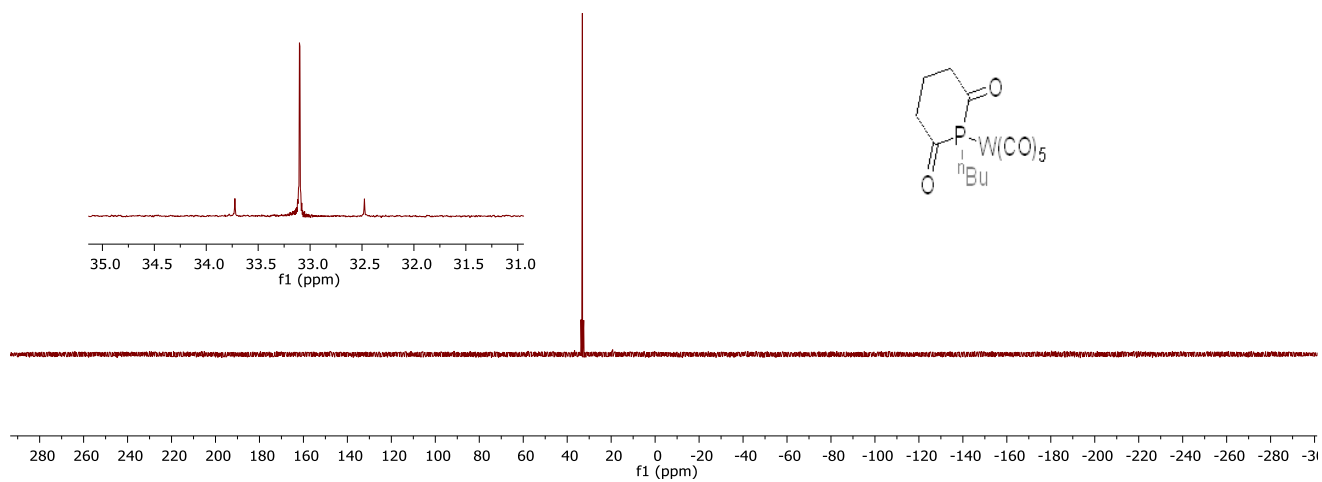

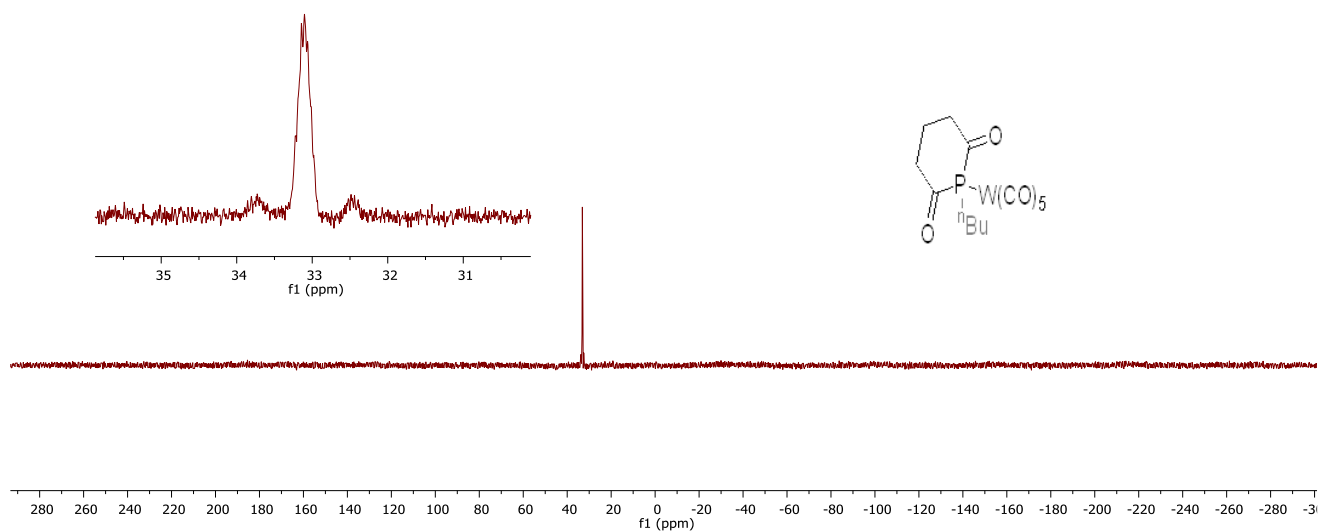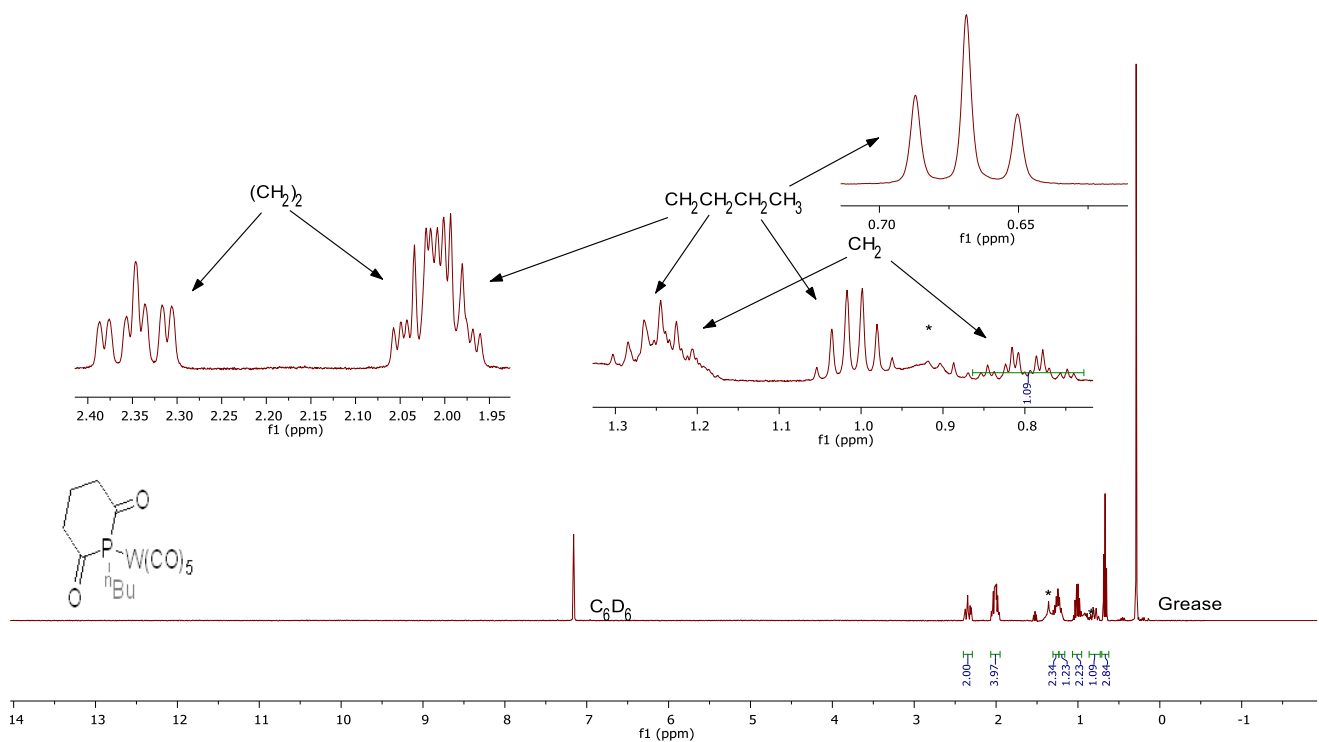

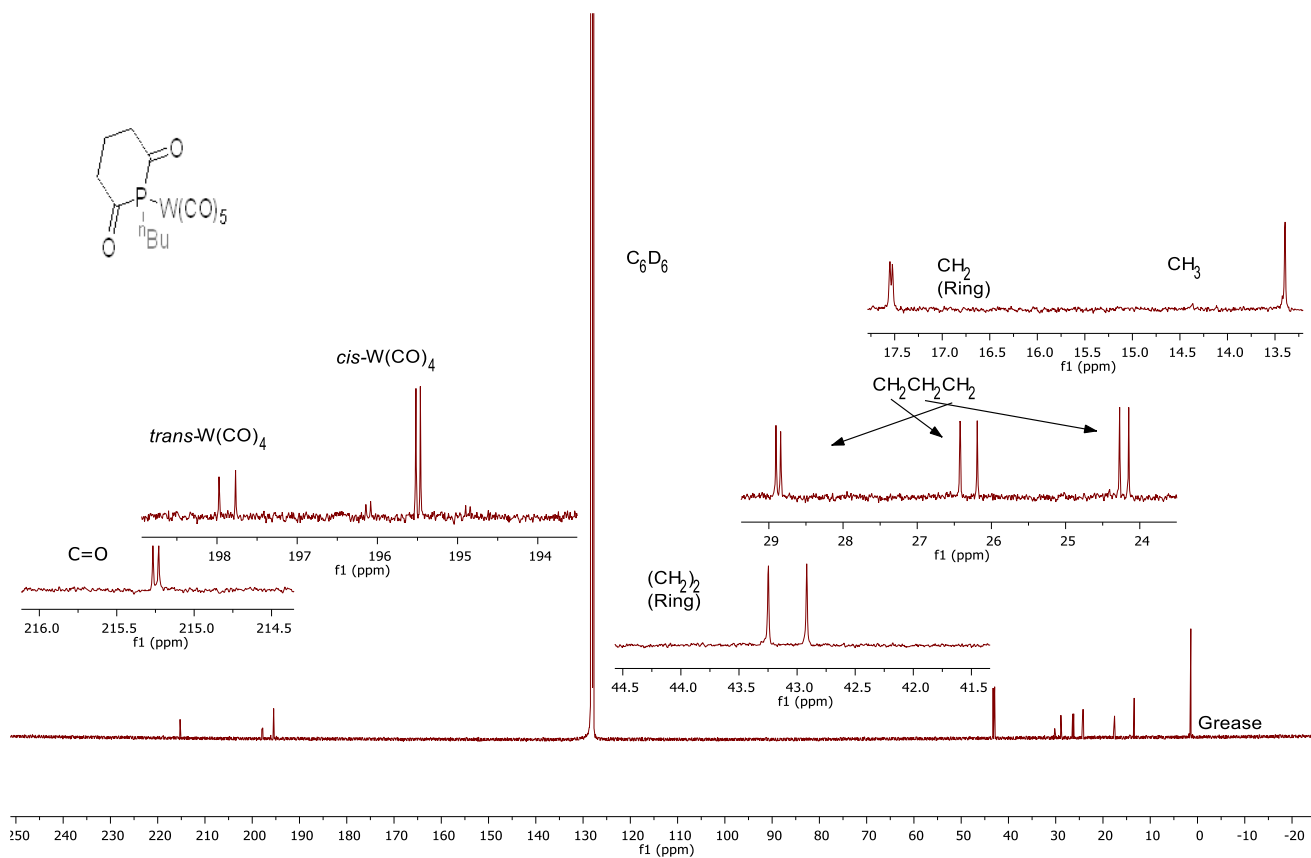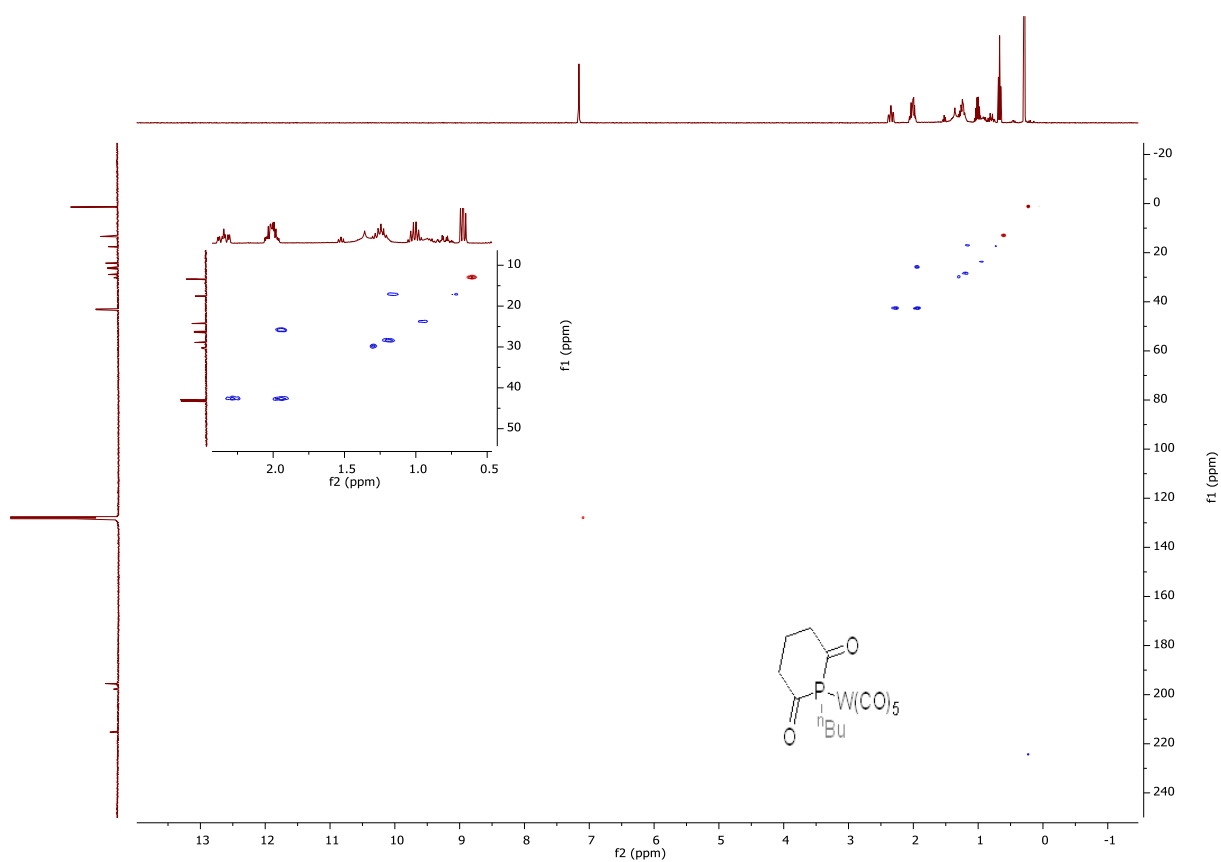

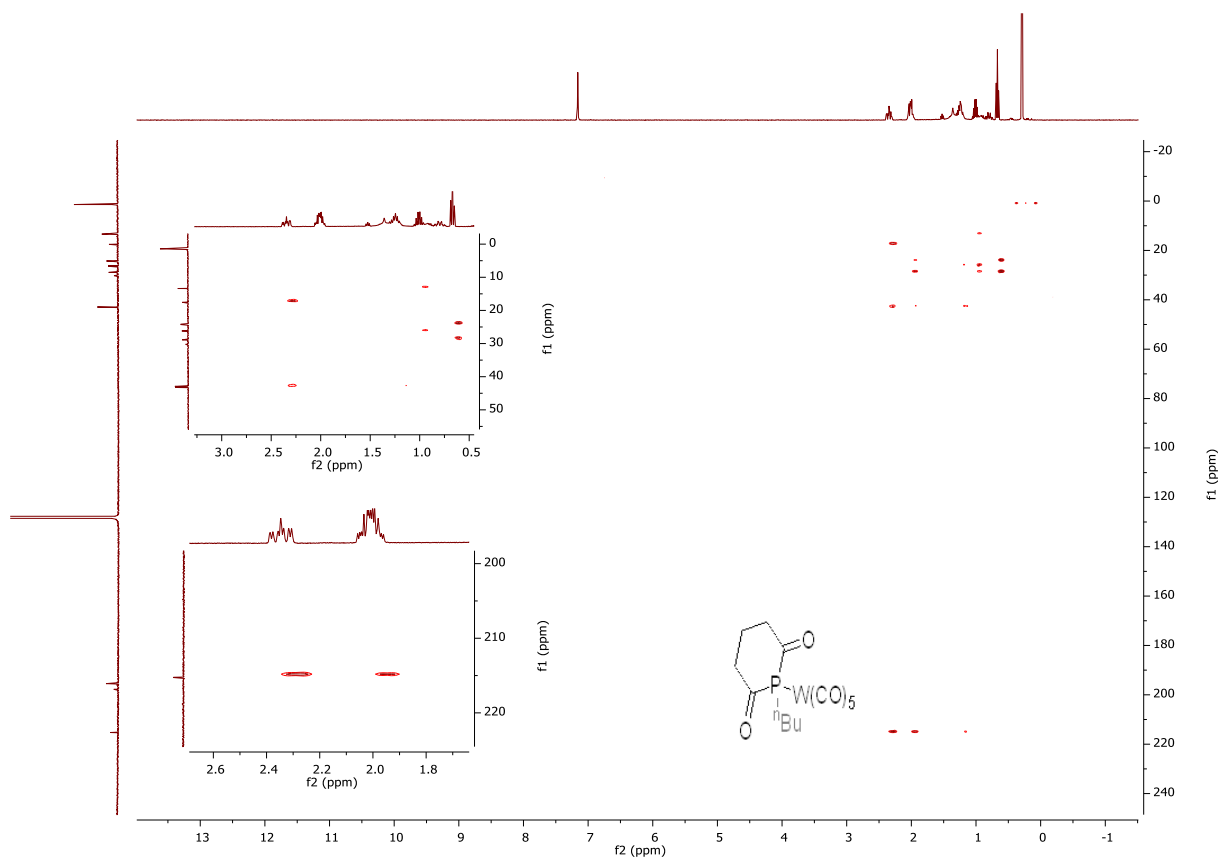

**Figure S68.**  $^1\text{H}$ - $^{13}\text{C}$  HMBC trace ( $\text{C}_6\text{D}_6$ , 303 K, 399.49, 100.46 MHz) for Compound **5b**.

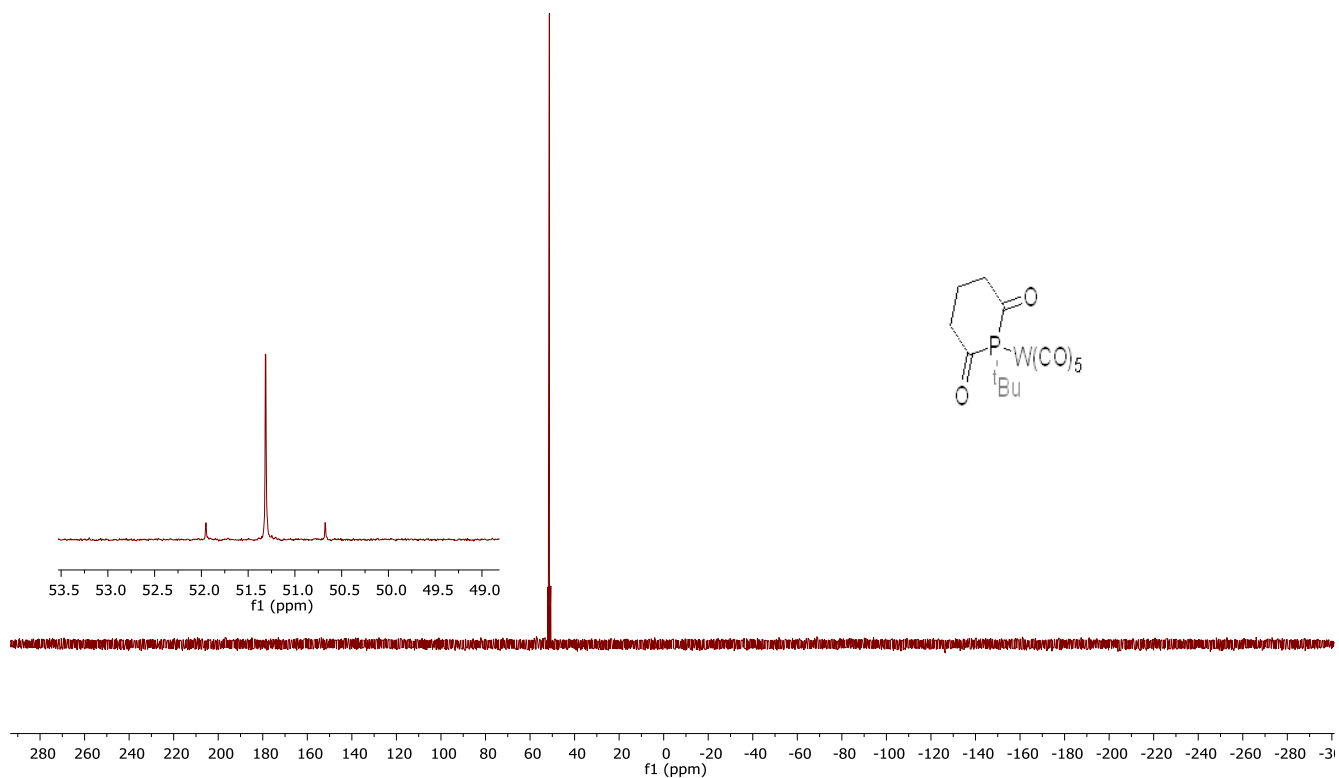

**Figure S69.**  $^{31}\text{P}\{^1\text{H}\}$  NMR Spectrum ( $\text{C}_6\text{D}_6$ , 303 K, 161.72 MHz) for compound **5c**.

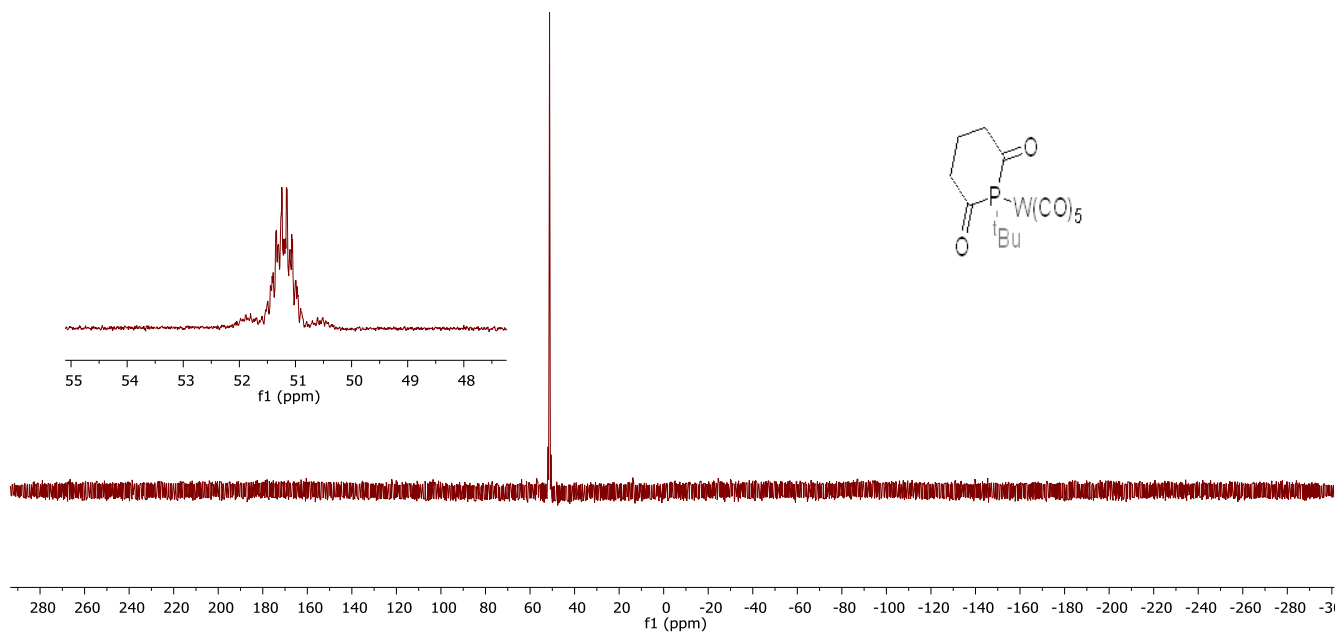

Figure S70.  $^{31}\text{P}$  NMR Spectrum ( $\text{C}_6\text{D}_6$ , 303 K, 161.72 MHz) for compound 5c.

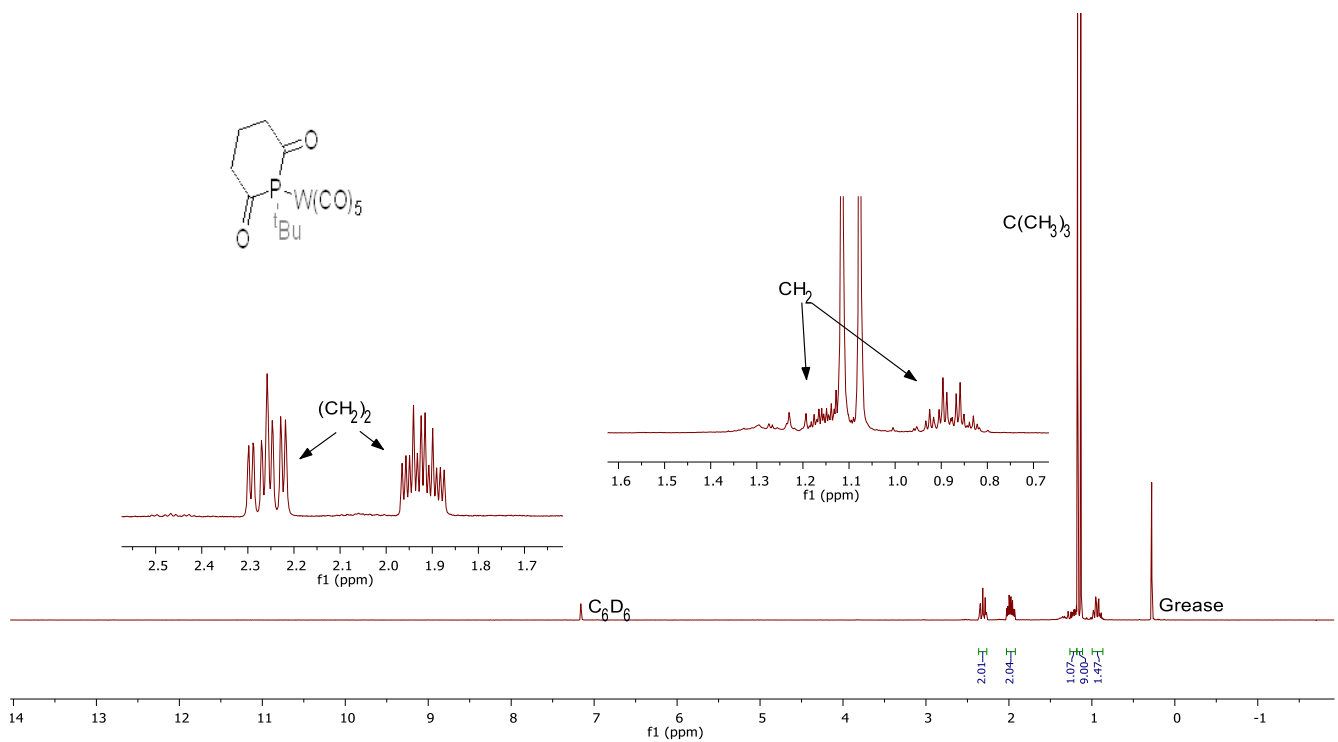

Figure S71.  $^1\text{H}$  NMR Spectrum ( $\text{C}_6\text{D}_6$ , 303 K, 399.49 MHz) for compound 5c.

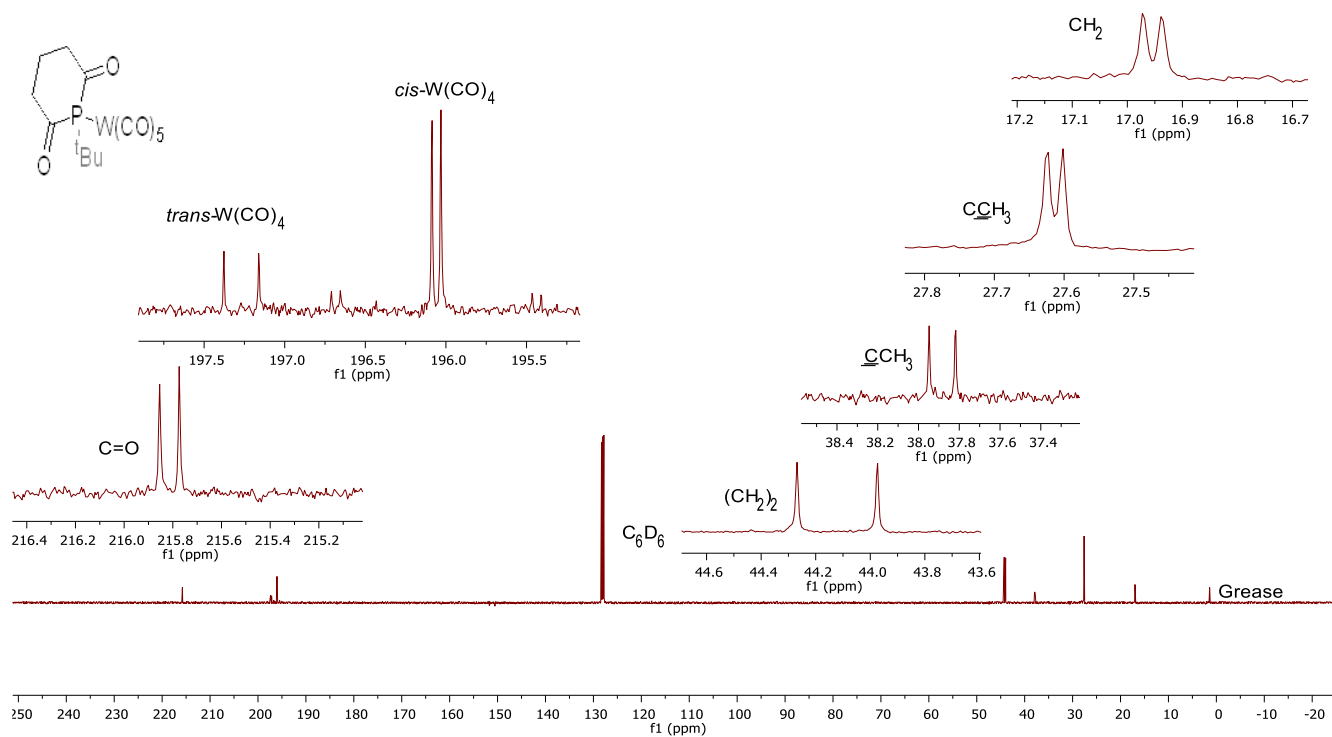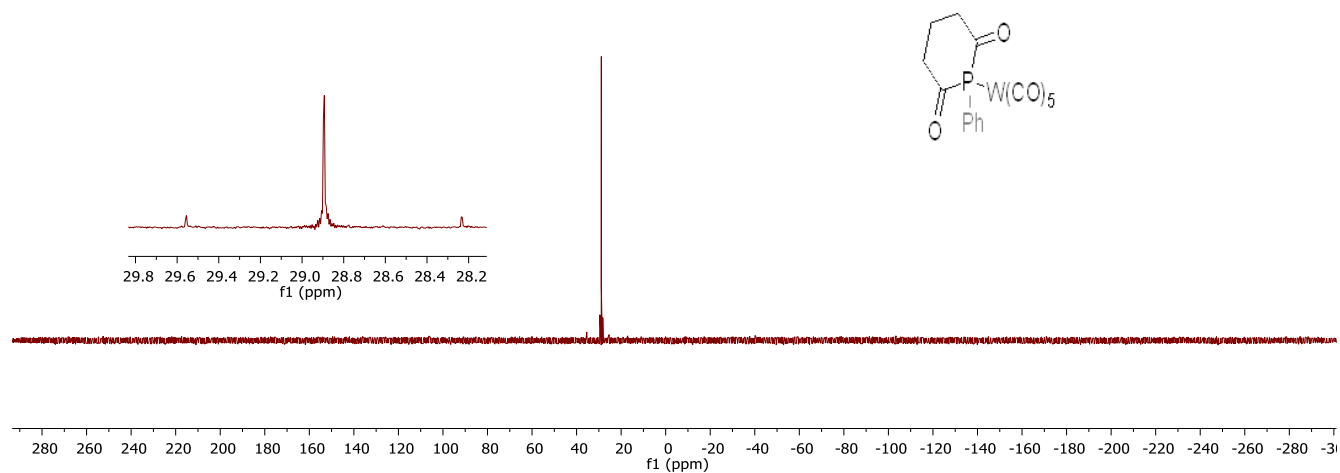

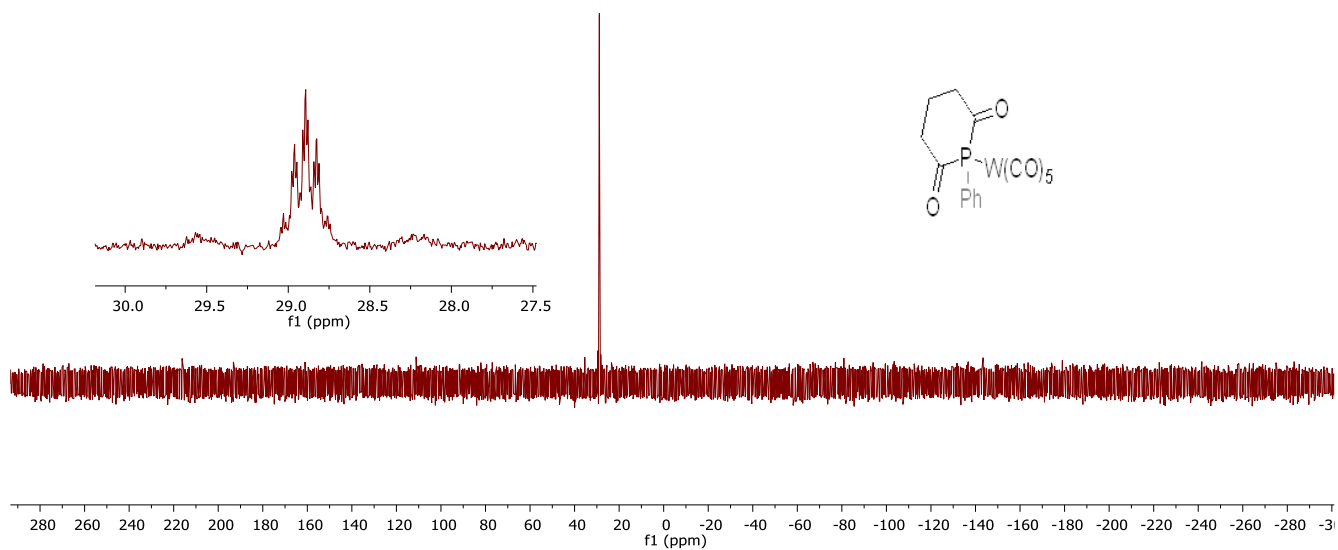

Figure S74.  $^{31}\text{P}$  NMR Spectrum ( $\text{C}_6\text{D}_6$ , 303 K, 161.72 MHz) for compound 5d.

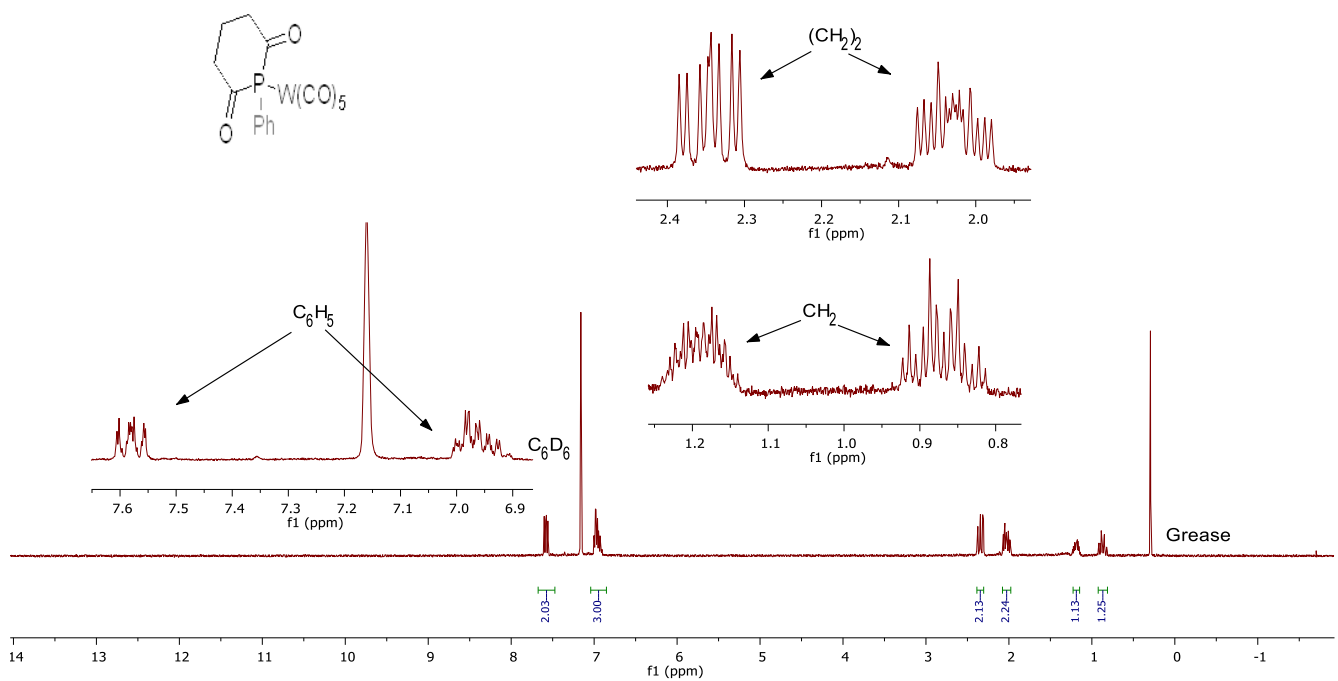

Figure S75.  $^1\text{H}$  NMR Spectrum ( $\text{C}_6\text{D}_6$ , 303 K, 399.49 MHz) for compound 5d.

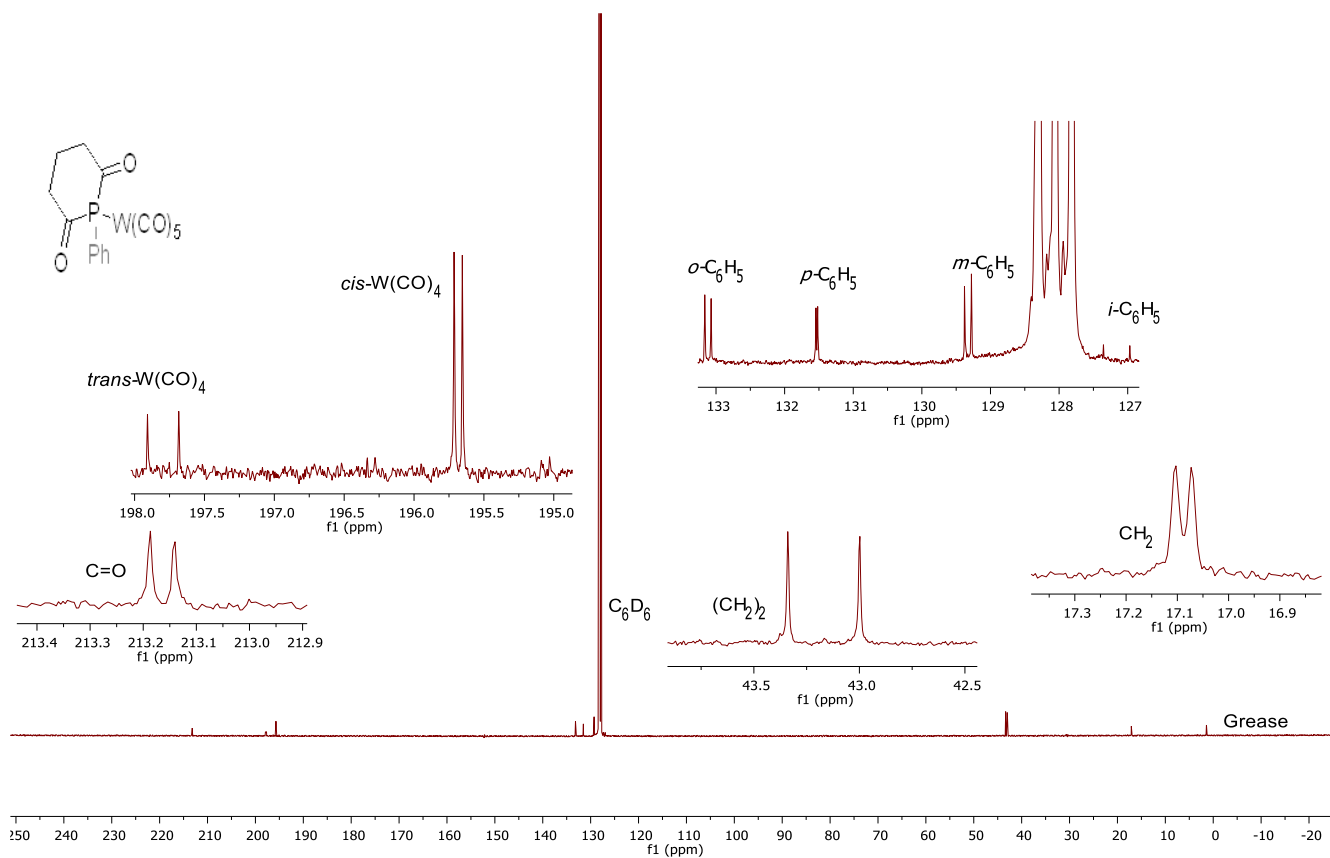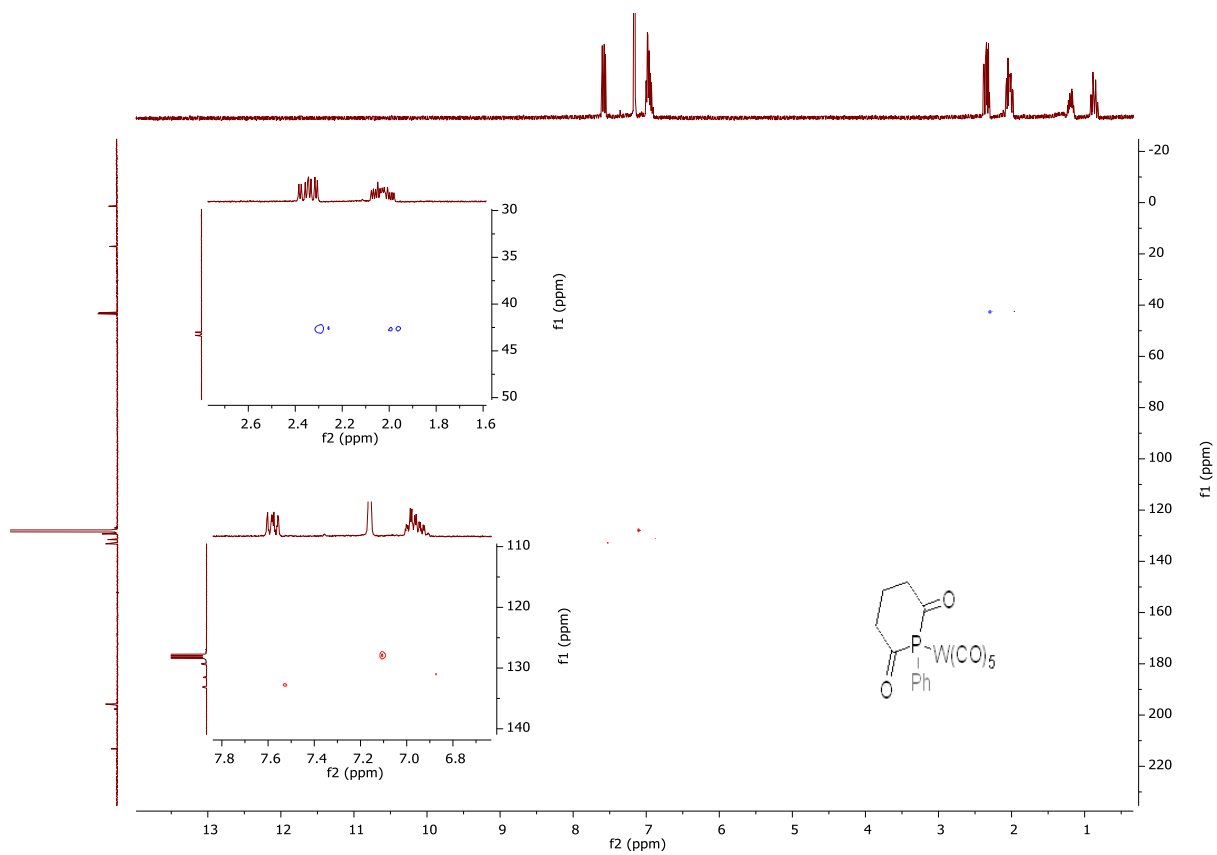



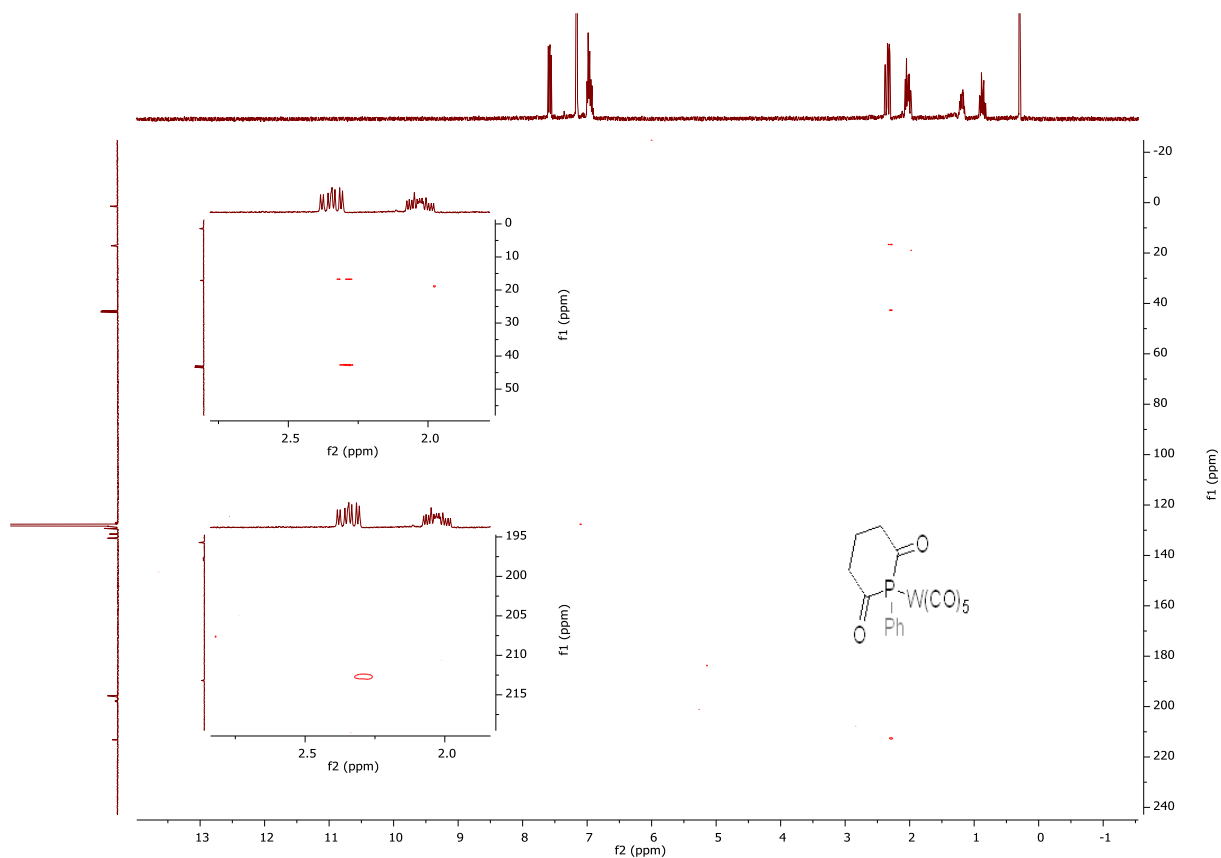

Figure S78.  $^1\text{H}$ - $^{13}\text{C}$  HMBC trace ( $\text{C}_6\text{D}_6$ , 303 K, 399.49, 100.46 MHz) for Compound 5d.

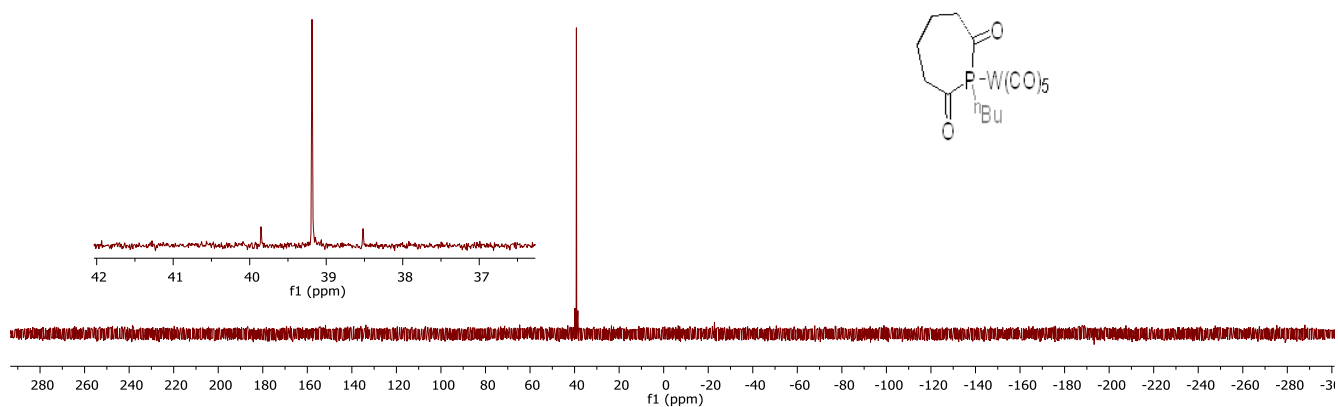

Figure S79.  $^{31}\text{P}\{^1\text{H}\}$  NMR Spectrum ( $\text{C}_6\text{D}_6$ , 303 K, 161.72 MHz) for compound 6.

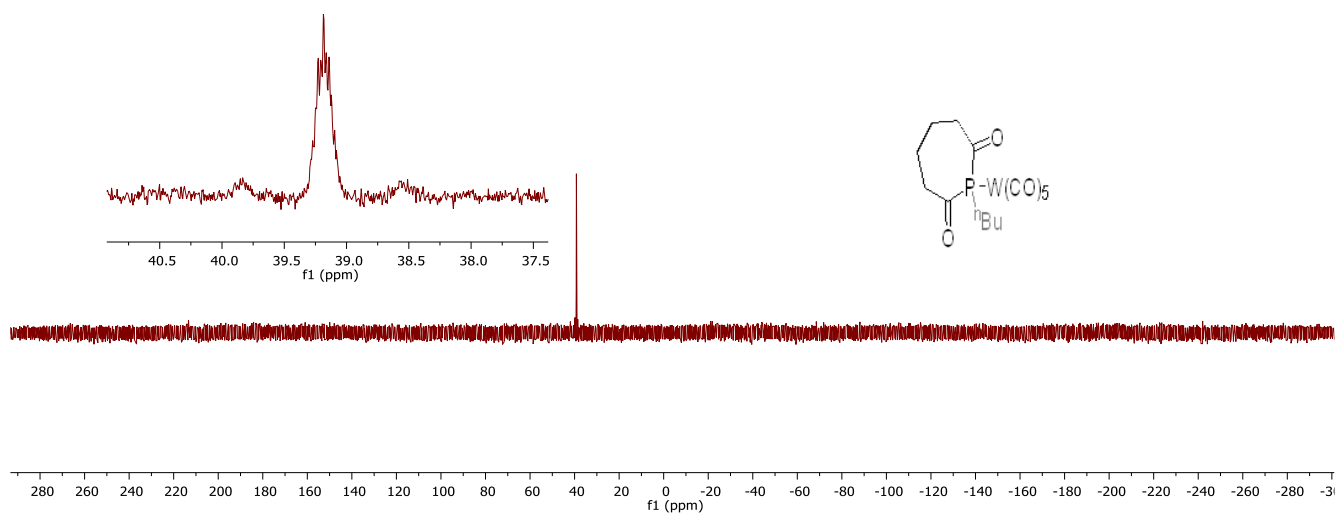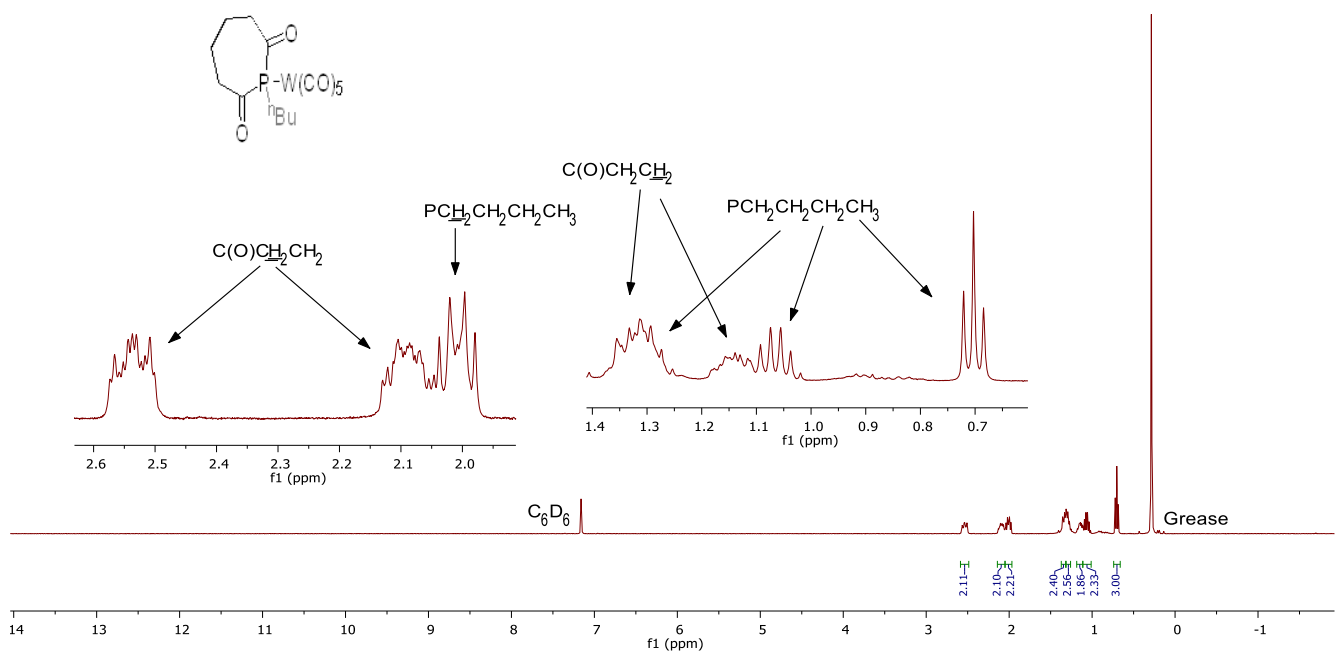

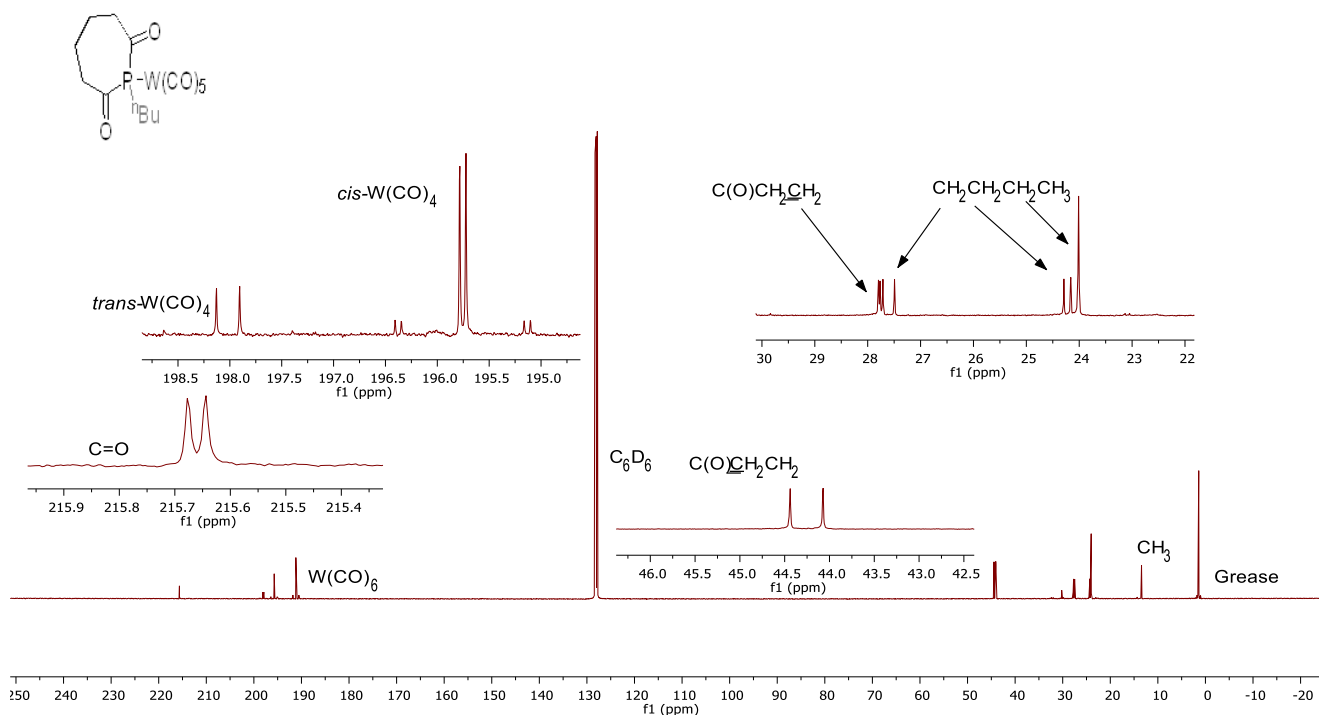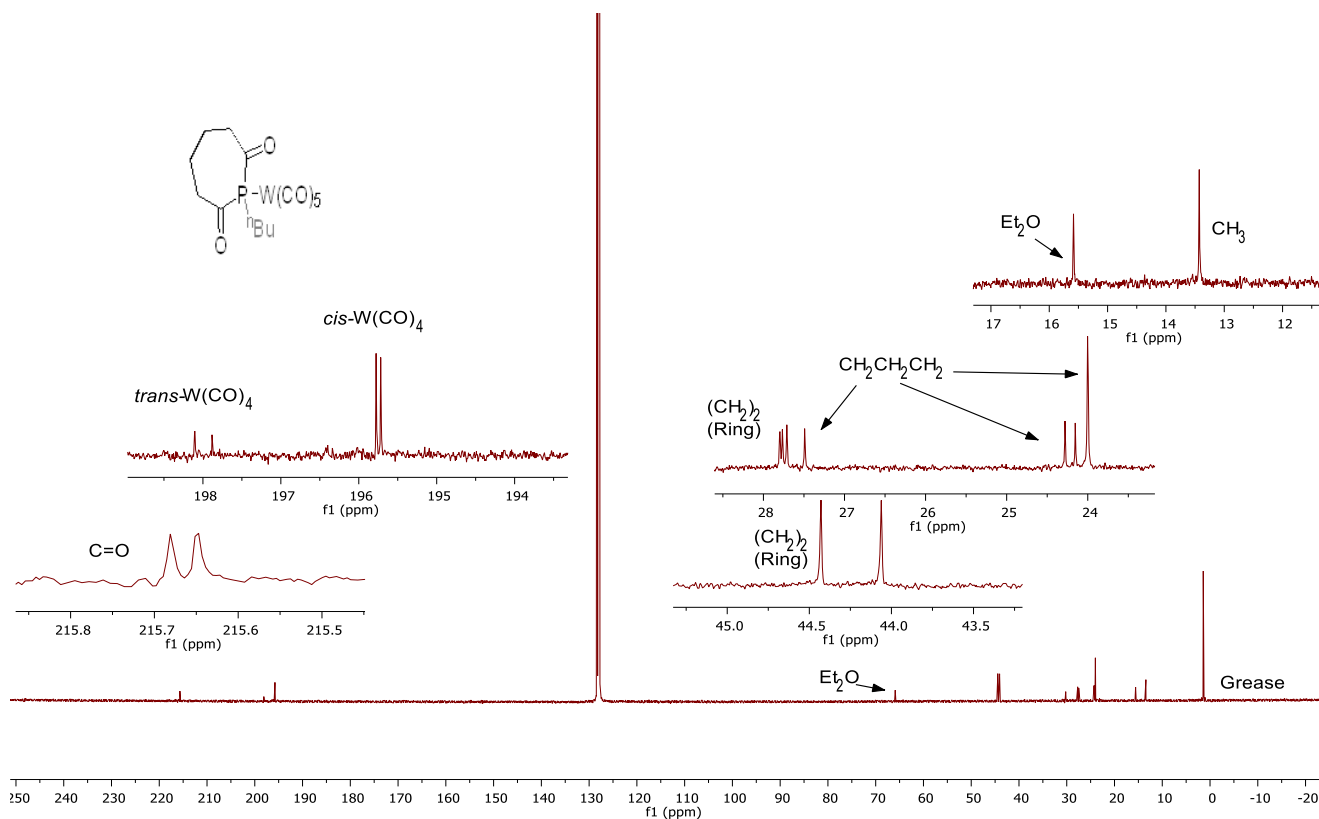

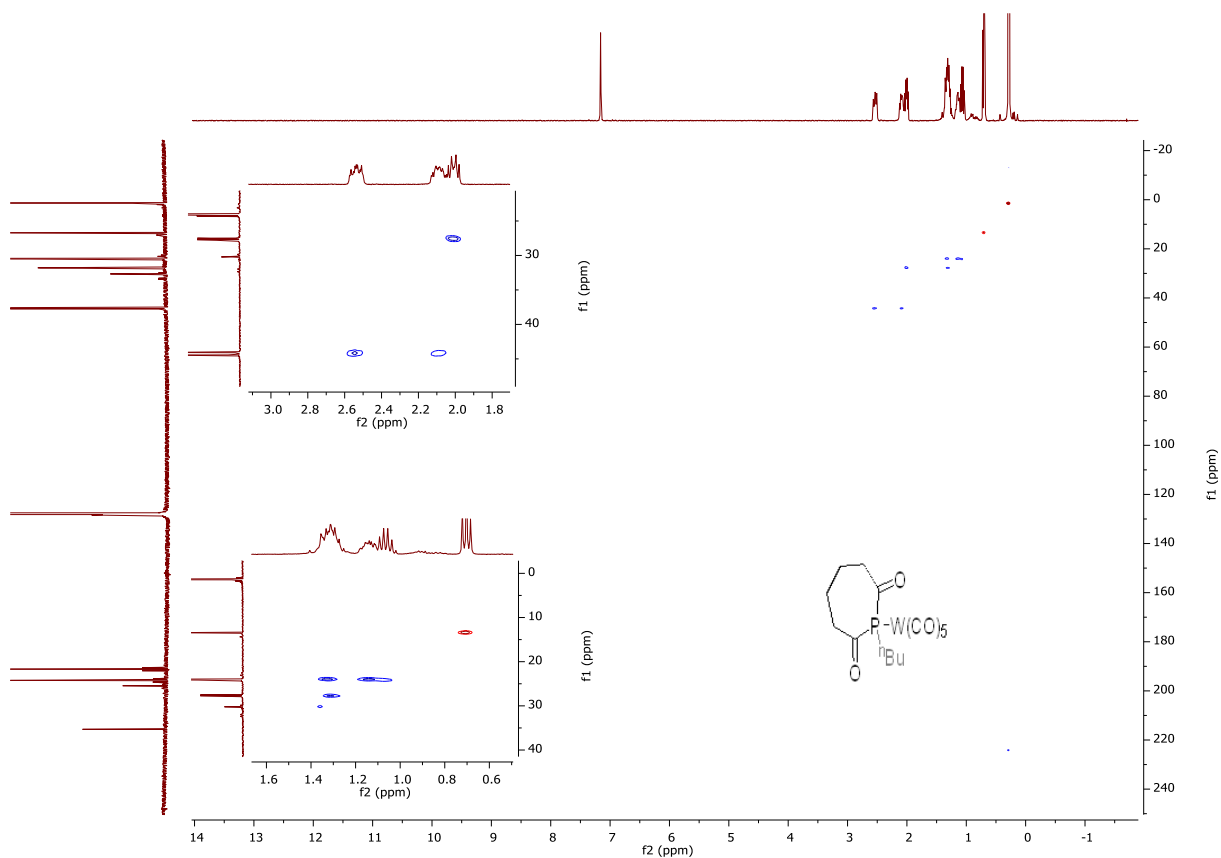

**Figure S84.**  $^1\text{H}$ - $^{13}\text{C}$  HSQC trace ( $\text{C}_6\text{D}_6$ , 303 K, 399.49, 100.46 MHz) for Compound **6**,  $\text{W}(\text{CO})_6$  present.

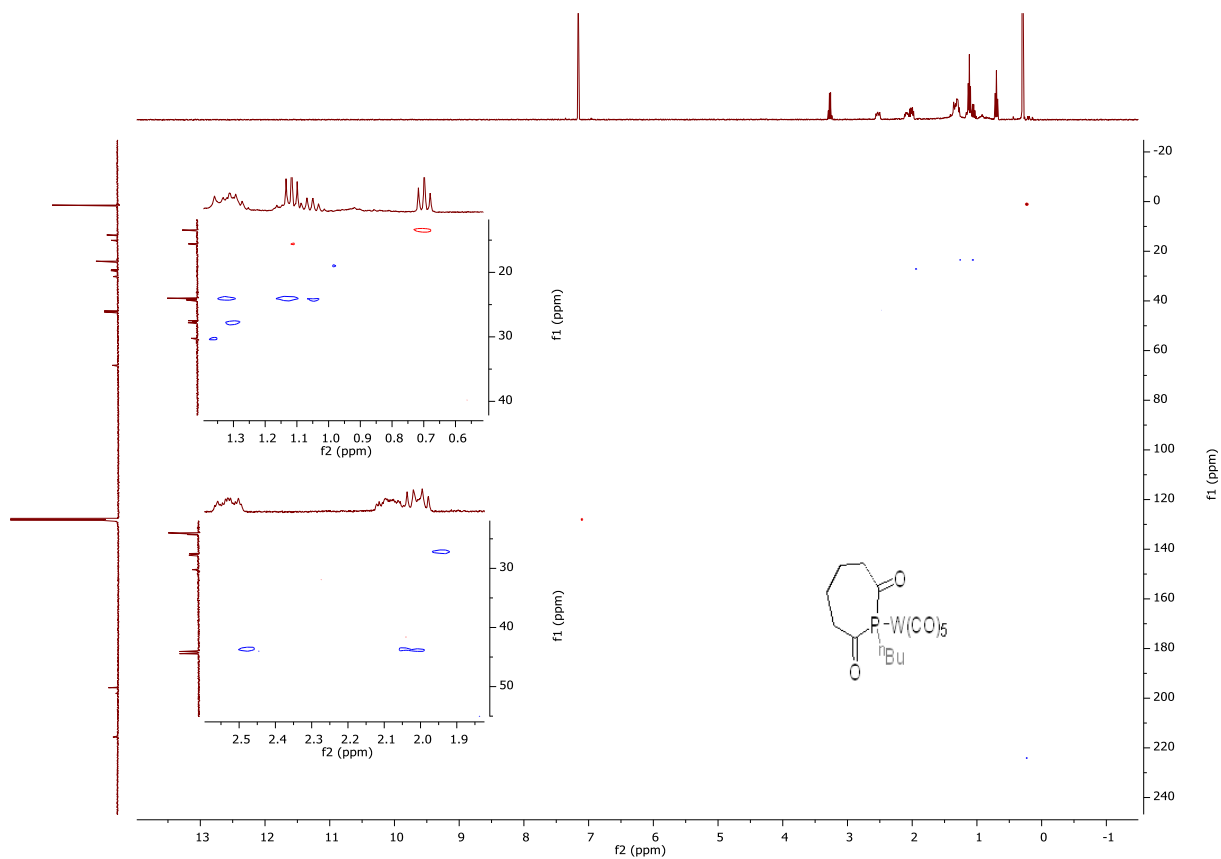

**Figure S85.**  $^1\text{H}$ - $^{13}\text{C}$  HSQC trace ( $\text{C}_6\text{D}_6$ , 303 K, 399.49, 100.46 MHz) for Compound **6**,  $\text{W}(\text{CO})_6$  removed.

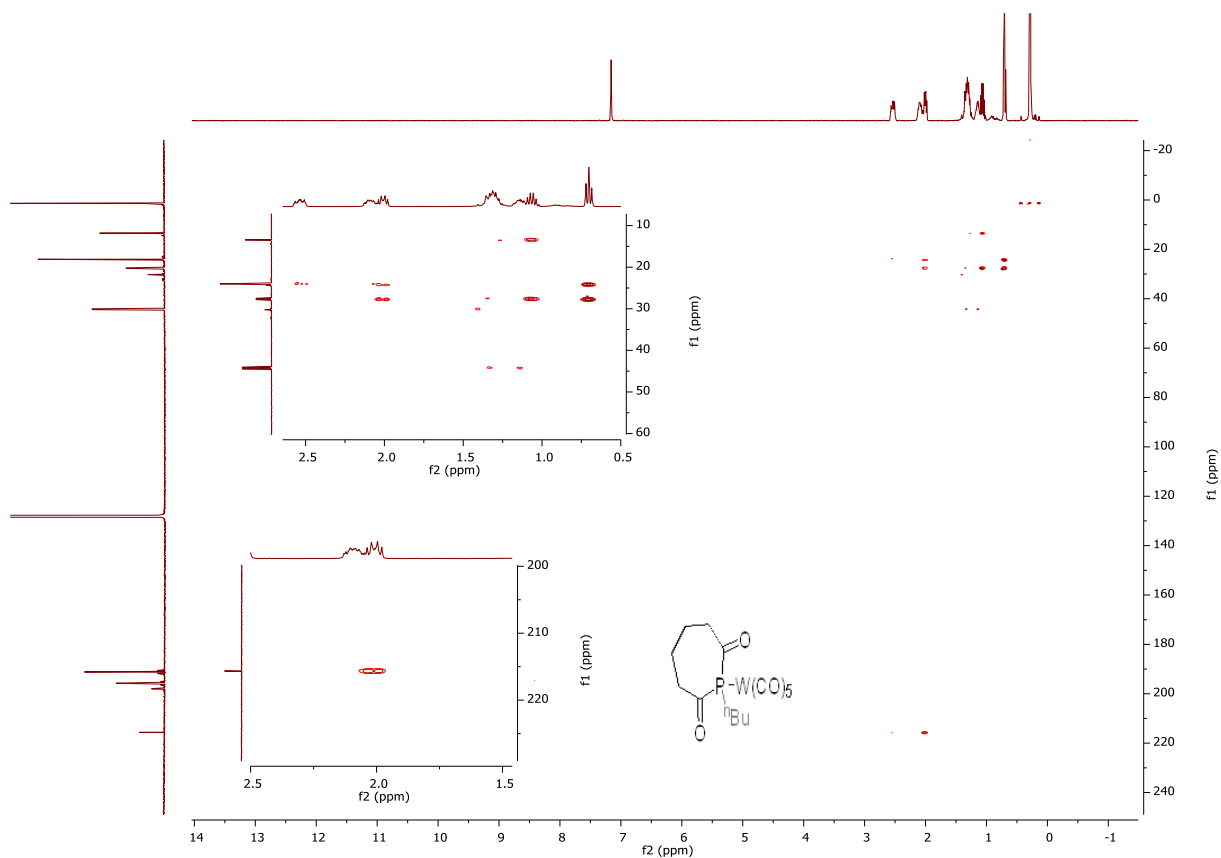

**Figure S86.**  $^1\text{H}$ - $^{13}\text{C}$  HMBC trace ( $\text{C}_6\text{D}_6$ , 303 K, 399.49, 100.46 MHz) for Compound **6**,  $\text{W}(\text{CO})_6$  present.

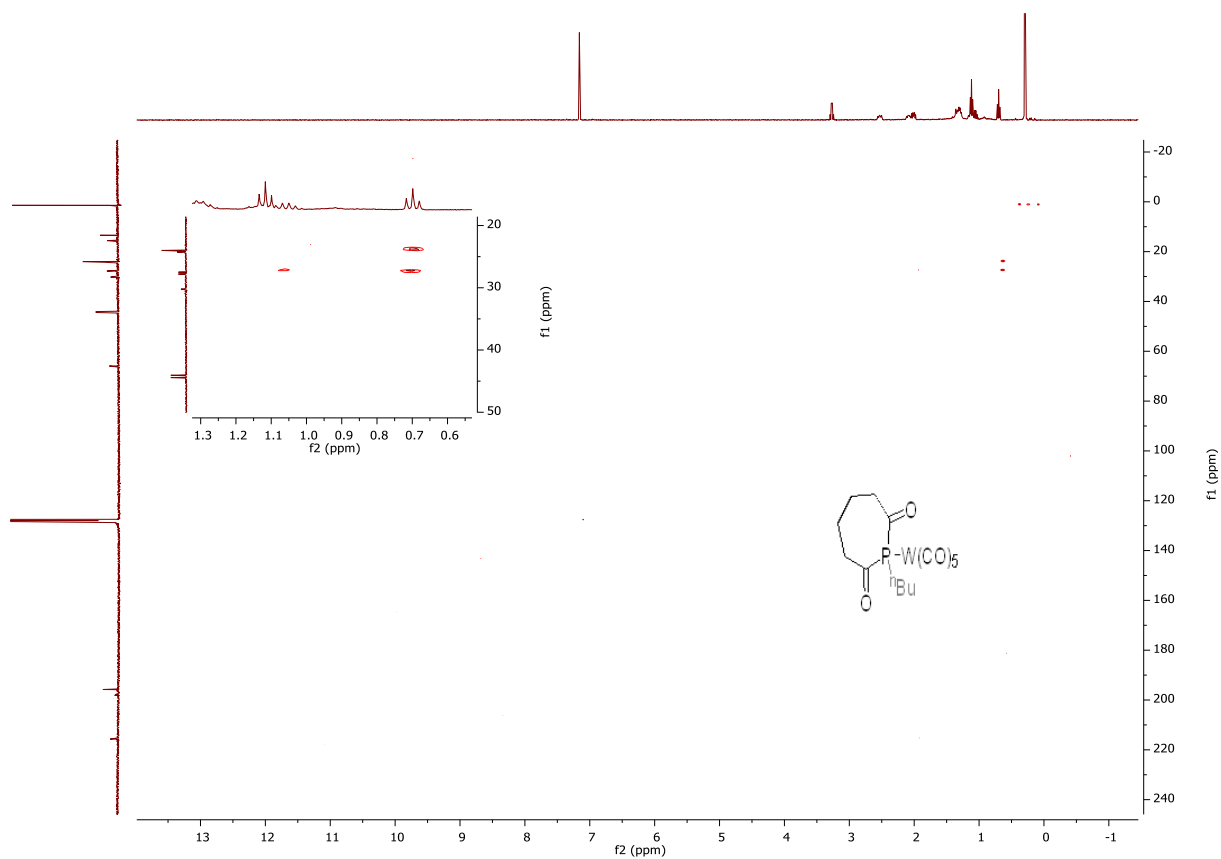

**Figure S87.**  $^1\text{H}$ - $^{13}\text{C}$  HMBC trace ( $\text{C}_6\text{D}_6$ , 303 K, 399.49, 100.46 MHz) for Compound **6**,  $\text{W}(\text{CO})_6$  removed.

Elemental Composition Report

Page 1

Single Mass Analysis

Tolerance = 70.0 PPM / DBE: min = -1.5, max = 50.0

Selected filters: None

Monoisotopic Mass, Odd and Even Electron Ions

12 formula(e) evaluated with 1 results within limits (all results (up to 1000) for each mass)

Elements Used:

C: 0-10 H: 0-1000 O: 0-2 P: 0-1

KGP-160

KYLE10885A 100 (7.174) Cm (94:106)

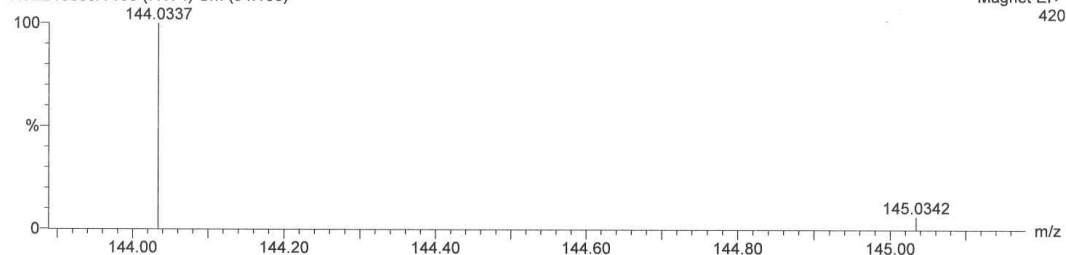

Minimum: -1.5  
Maximum: 5.0 70.0 50.0

| Mass     | Calc. Mass | mDa  | PPM  | DBE | i-FIT     | Formula    |
|----------|------------|------|------|-----|-----------|------------|
| 144.0337 | 144.0340   | -0.3 | -2.1 | 3.0 | 2773013.8 | C6 H9 O2 P |

Figure S88. HRMS-EI for Compound 2a.

Elemental Composition Report

Page 1

Single Mass Analysis

Tolerance = 50.0 PPM / DBE: min = -1.5, max = 50.0

Selected filters: None

Monoisotopic Mass, Odd and Even Electron Ions

7 formula(e) evaluated with 1 results within limits (all results (up to 1000) for each mass)

Elements Used:

C: 0-9 H: 0-1000 O: 0-2 P: 0-1

KGP-199

KYLE10883 24 (1.723)

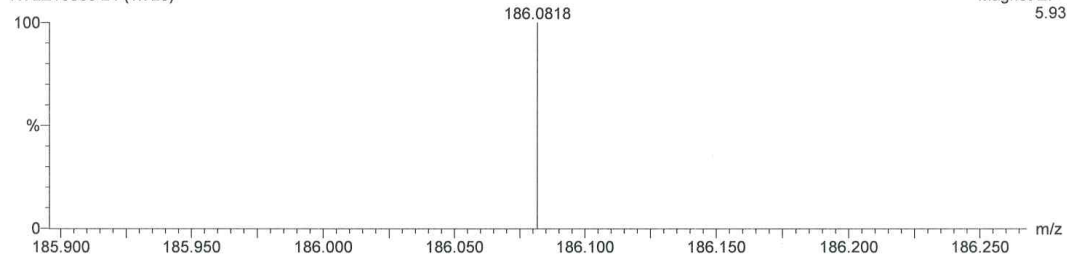

Minimum: -1.5  
Maximum: 5.0 50.0 50.0

| Mass     | Calc. Mass | mDa | PPM | DBE | i-FIT     | Formula     |
|----------|------------|-----|-----|-----|-----------|-------------|
| 186.0818 | 186.0810   | 0.8 | 4.3 | 3.0 | 5546025.5 | C9 H15 O2 P |

Figure S89. HRMS-EI for Compound 2b.

## Elemental Composition Report

Page 1

### Single Mass Analysis

Tolerance = 50.0 PPM / DBE: min = -1.5, max = 50.0

Selected filters: None

Monoisotopic Mass, Odd and Even Electron Ions

7 formula(e) evaluated with 1 results within limits (all results (up to 1000) for each mass)

Elements Used:

C: 0-9 H: 0-1000 O: 0-2 P: 0-1

KGP-181

KYLE10884 105 (7.540) Cm (101:105)

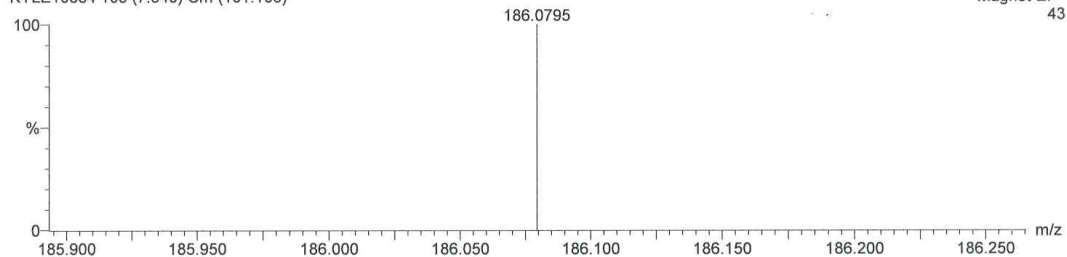

|          |            |      |      |      |           |             |
|----------|------------|------|------|------|-----------|-------------|
| Minimum: |            |      |      | -1.5 |           |             |
| Maximum: | 5.0        | 50.0 | 50.0 | 50.0 |           |             |
| Mass     | Calc. Mass | mDa  | PPM  | DBE  | i-FIT     | Formula     |
| 186.0795 | 186.0810   | -1.5 | -8.1 | 3.0  | 5546029.5 | C9 H15 O2 P |

Figure S90. HRMS-El for Compound 2c.

## Elemental Composition Report

Page 1

### Single Mass Analysis

Tolerance = 50.0 PPM / DBE: min = -1.5, max = 50.0

Selected filters: None

Monoisotopic Mass, Odd and Even Electron Ions

9 formula(e) evaluated with 1 results within limits (all results (up to 1000) for each mass)

Elements Used:

C: 0-12 H: 0-1000 O: 0-2 P: 0-1

KGP-198

KYLE10368 16 (1.253)

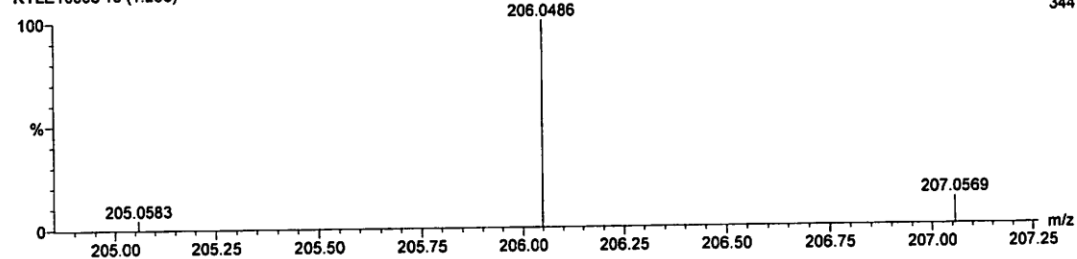

|          |            |      |      |      |           |              |
|----------|------------|------|------|------|-----------|--------------|
| Minimum: |            |      |      | -1.5 |           |              |
| Maximum: | 5.0        | 50.0 | 50.0 | 50.0 |           |              |
| Mass     | Calc. Mass | mDa  | PPM  | DBE  | i-FIT     | Formula      |
| 206.0486 | 206.0497   | -1.1 | -5.3 | 7.0  | 2773016.5 | C11 H11 O2 P |

Figure S91. HRMS-El for Compound 2d.

Elemental Composition Report

Page 1

Single Mass Analysis

Tolerance = 10.0 PPM / DBE: min = -1.5, max = 50.0

Selected filters: None

Monoisotopic Mass, Odd and Even Electron Ions

7 formula(e) evaluated with 1 results within limits (all results (up to 1000) for each mass)

Elements Used:

C: 0-14 H: 0-1000 O: 0-2 P: 0-1

VS013

KYLE10886 37 (2.657)

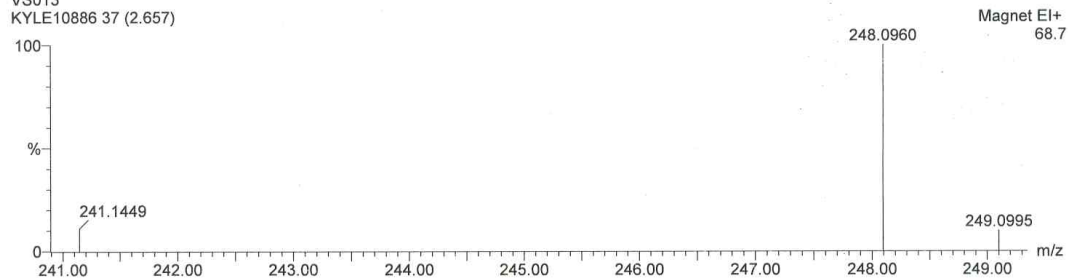

Minimum: -1.5  
Maximum: 5.0 10.0 50.0

| Mass     | Calc. Mass | mDa  | PPM  | DBE | i-FIT     | Formula      |
|----------|------------|------|------|-----|-----------|--------------|
| 248.0960 | 248.0966   | -0.6 | -2.4 | 7.0 | 2773013.5 | C14 H17 O2 P |

Figure S92. HRMS-EI for Compound 2e.

Elemental Composition Report

Page 1

Single Mass Analysis

Tolerance = 50.0 PPM / DBE: min = -1.5, max = 50.0

Selected filters: None

Monoisotopic Mass, Odd and Even Electron Ions

12 formula(e) evaluated with 1 results within limits (all results (up to 1000) for each mass)

Elements Used:

C: 0-10 H: 0-1000 O: 0-2 P: 0-1

KGP-217

KYLE10890A 35 (2.511) Cm (35:38)

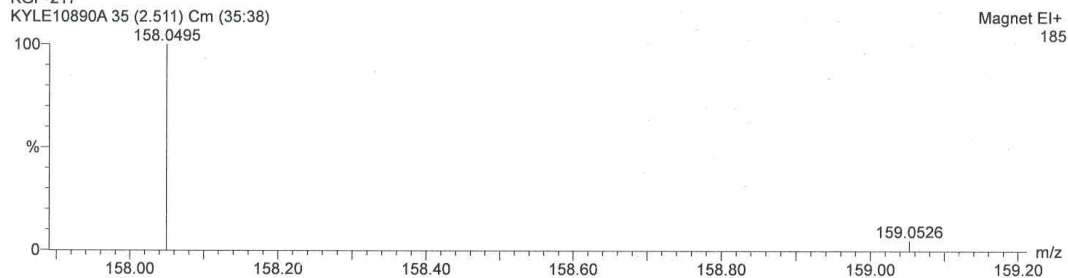

Minimum: -1.5  
Maximum: 5.0 50.0 50.0

| Mass     | Calc. Mass | mDa  | PPM  | DBE | i-FIT     | Formula     |
|----------|------------|------|------|-----|-----------|-------------|
| 158.0495 | 158.0497   | -0.2 | -1.3 | 3.0 | 2773014.3 | C7 H11 O2 P |

Figure S93. HRMS-EI for Compound 3a.



## Elemental Composition Report

Page 1

### Single Mass Analysis

Tolerance = 10000.0 PPM / DBE: min = -1.5, max = 50.0

Selected filters: None

Monoisotopic Mass, Odd and Even Electron Ions

7 formula(e) evaluated with 1 results within limits (all results (up to 1000) for each mass)

Elements Used:

C: 0-10 H: 0-1000 O: 0-2 P: 0-1

KGP-360

KYLE\_11052 12 (0.862)

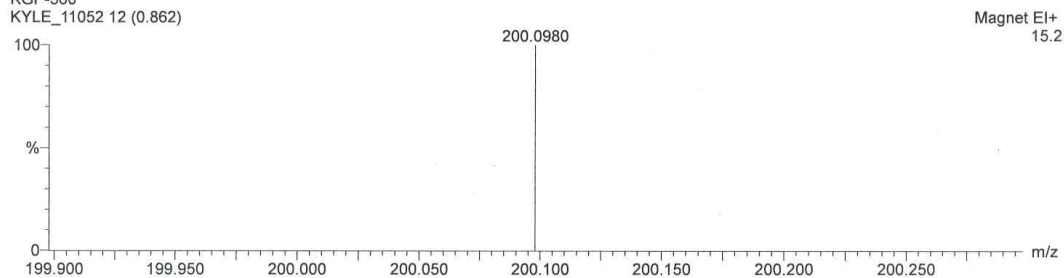

|          |            |     |         |      |        |              |  |
|----------|------------|-----|---------|------|--------|--------------|--|
| Minimum: |            |     |         | -1.5 |        |              |  |
| Maximum: |            | 5.0 | 10000.0 | 50.0 |        |              |  |
| Mass     | Calc. Mass | mDa | PPM     | DBE  | i-FIT  | Formula      |  |
| 200.0980 | 200.0966   | 1.4 | 7.0     | 3.0  | 5310.1 | C10 H17 O2 P |  |

Figure S94. HRMS-El for Compound 3b.

## Elemental Composition Report

Page 1

### Single Mass Analysis

Tolerance = 10000.0 PPM / DBE: min = -1.5, max = 50.0

Selected filters: None

Monoisotopic Mass, Odd and Even Electron Ions

7 formula(e) evaluated with 1 results within limits (all results (up to 1000) for each mass)

Elements Used:

C: 0-10 H: 0-1000 O: 0-2 P: 0-1

KGP-359

KYLE\_11051A 17 (1.221) Cm (2.41)

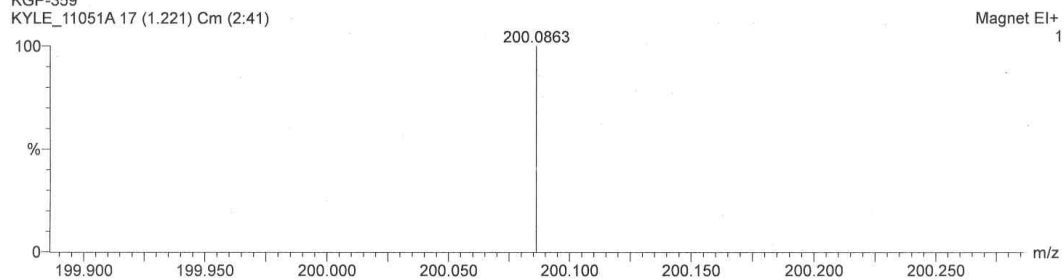

|          |            |       |         |      |       |              |  |
|----------|------------|-------|---------|------|-------|--------------|--|
| Minimum: |            |       |         | -1.5 |       |              |  |
| Maximum: |            | 5.0   | 10000.0 | 50.0 |       |              |  |
| Mass     | Calc. Mass | mDa   | PPM     | DBE  | i-FIT | Formula      |  |
| 200.0863 | 200.0966   | -10.3 | -51.5   | 3.0  | 353.6 | C10 H17 O2 P |  |

Figure S95. HRMS-El for Compound 3c (very volatile, gave only one scan out of 3 samples, leading to higher error).

## Elemental Composition Report

Page 1

### Single Mass Analysis

Tolerance = 10.0 PPM / DBE: min = -1.5, max = 50.0

Selected filters: None

Monoisotopic Mass, Odd and Even Electron Ions

7 formula(e) evaluated with 1 results within limits (all results (up to 1000) for each mass)

Elements Used:

C: 0-12 H: 0-1000 O: 0-2 P: 0-1

KGP-358

KYLE\_11050 39 (2.800) Cm (33:39)

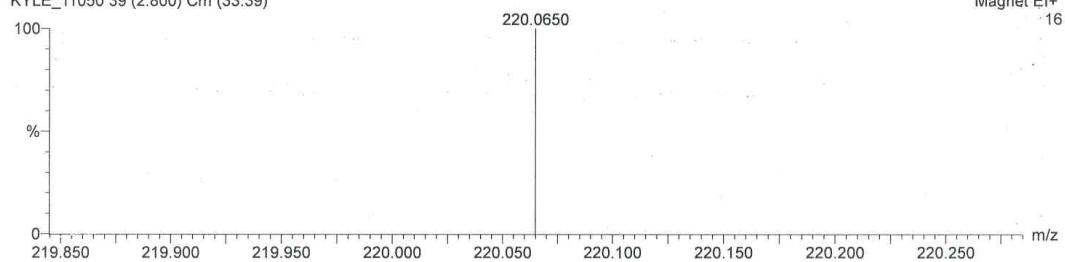

Minimum: -1.5  
Maximum: 5.0 10.0 50.0

| Mass     | Calc. Mass | mDa  | PPM  | DBE | i-FIT     | Formula      |
|----------|------------|------|------|-----|-----------|--------------|
| 220.0650 | 220.0653   | -0.3 | -1.4 | 7.0 | 5546026.0 | C12 H13 O2 P |

**Figure S96. HRMS-EI for Compound 3d.**

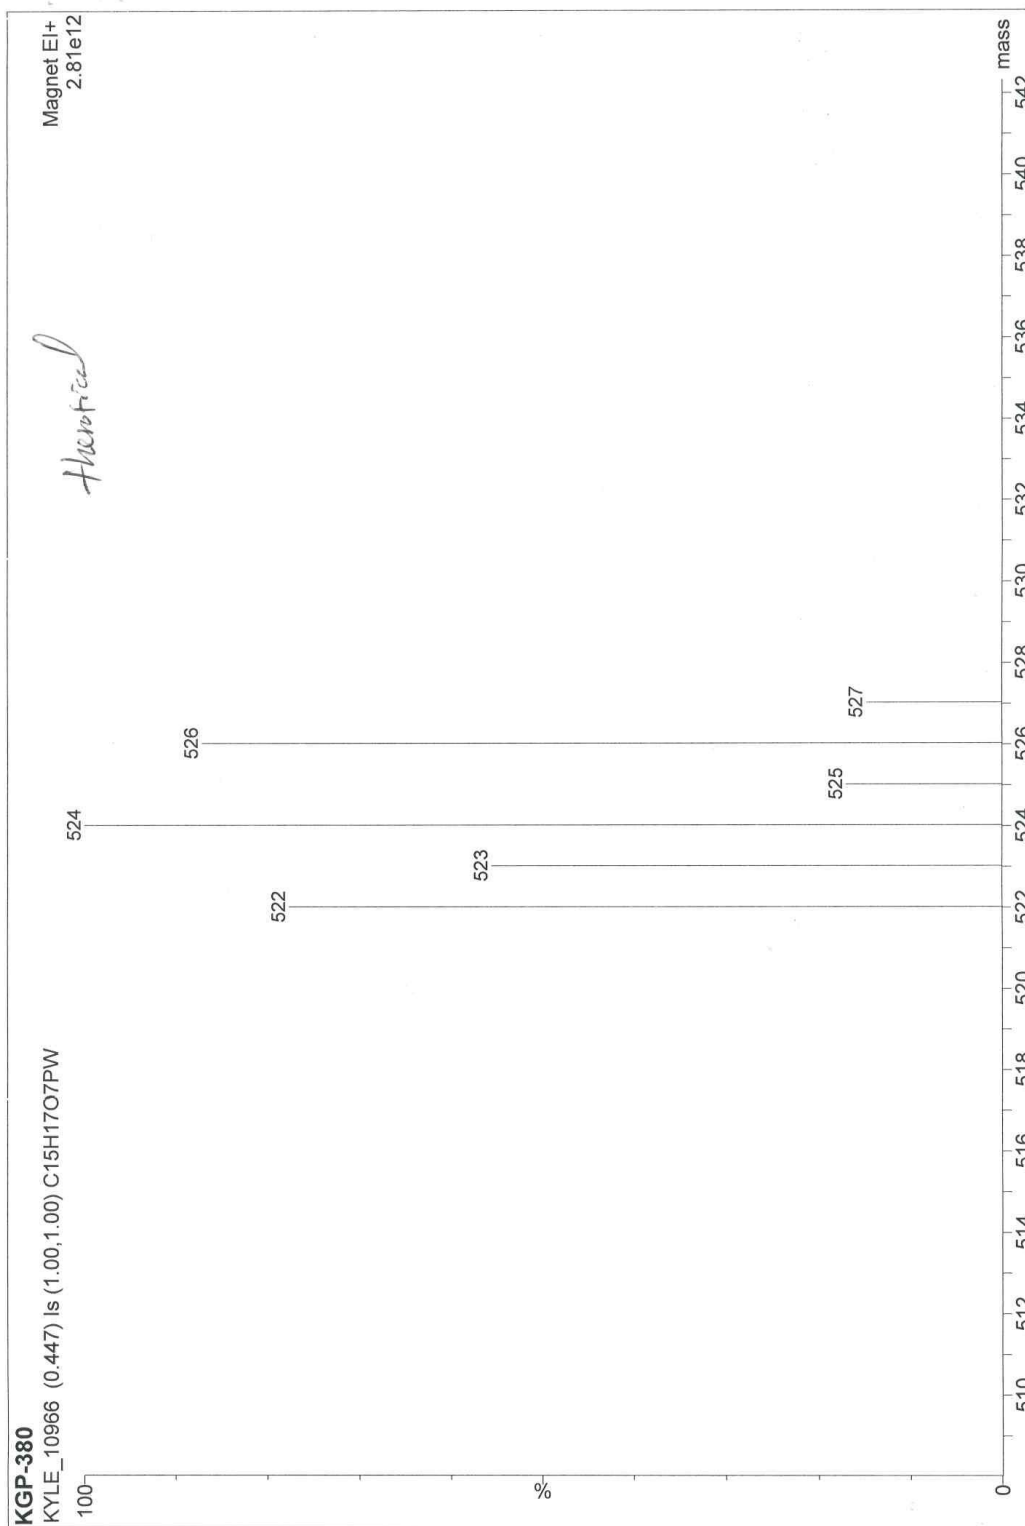

**Figure S97.** LRMS-EI Theoretical Isotope Distribution for Compound 6.

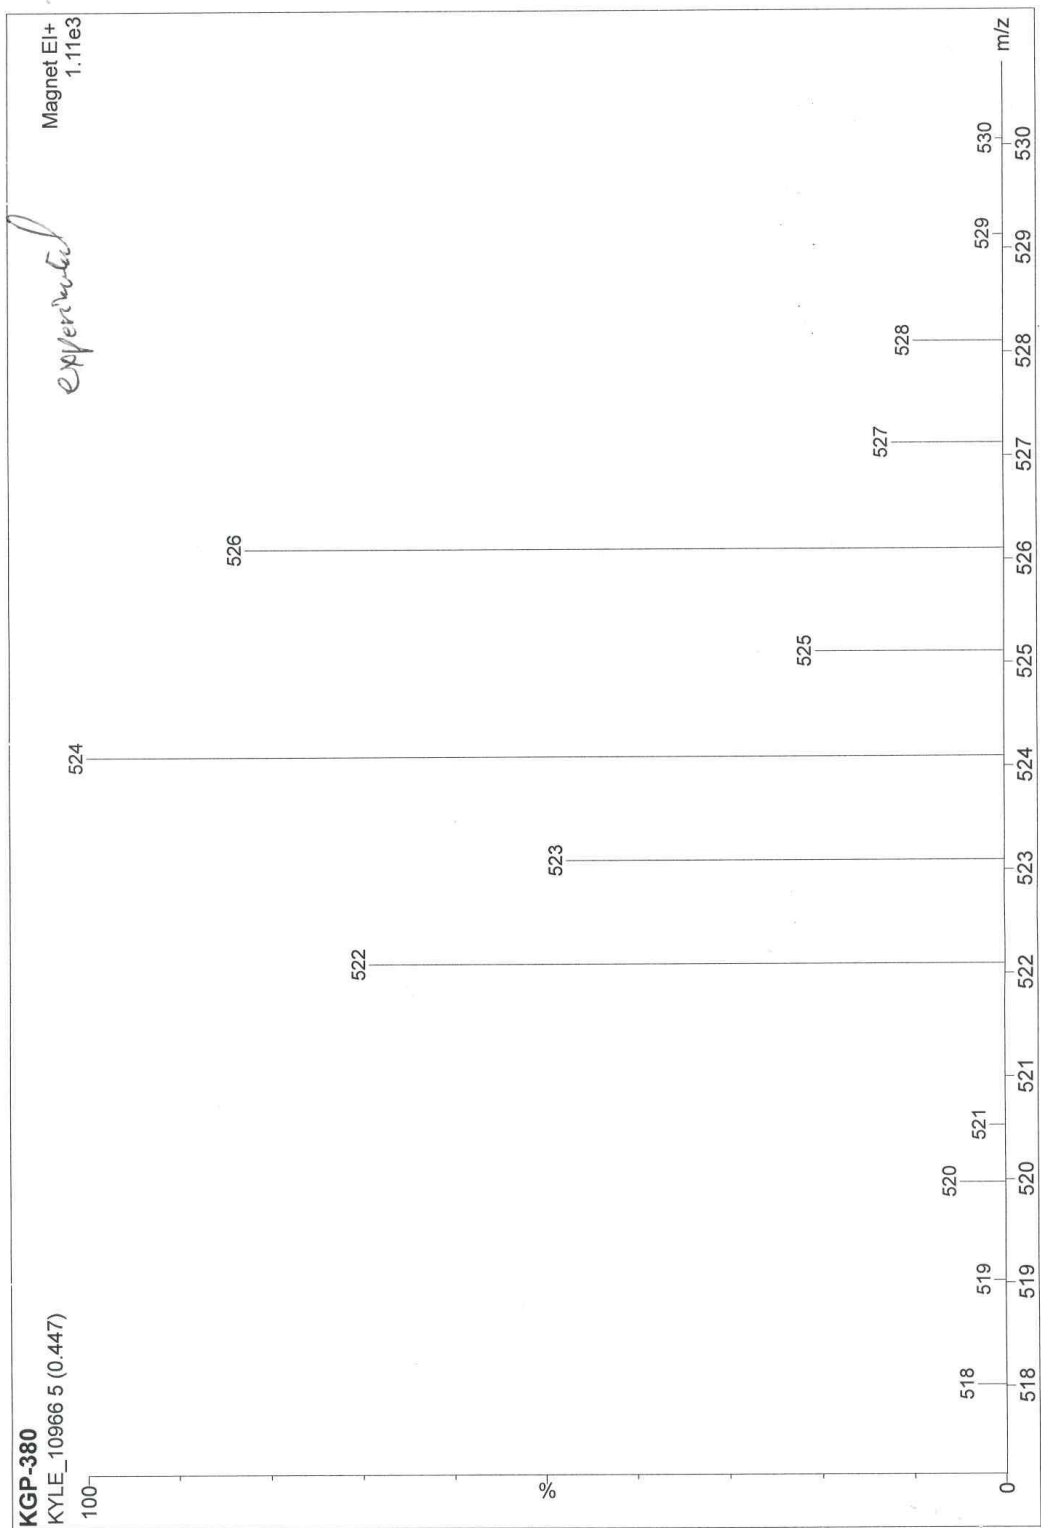

Figure S98. LRMS-EI for Compound 6.
